# Supplementary material for: A reference catalog of DNA palindromes in the human genome and their variations in 1000 Genomes
Source: PubMed Central journal article supplement (PMC7680136; doi:10.1038/s41439-020-00127-5), 2020-11-20
Supplement: 41439_2020_127_MOESM2_ESM.pdf [file 41439_2020_127_MOESM2_ESM.pdf]

Distribution of Palindromes in Different Regions

| Chromosome | Exons  | Introns | Upstream | Introns (that are not exons) | Upstream + Exon | Upstream + Intron | Exclusively Upstream | Crossover | Intergenic | Coding Exons | UTR    |
|------------|--------|---------|----------|------------------------------|-----------------|-------------------|----------------------|-----------|------------|--------------|--------|
| 1          | 46,461 | 542,660 | 106,941  | 523,284                      | 40,564          | 95,159            | 34,825               | 1,628     | 409,272    | 12,522       | 39,319 |
| 2          | 35,752 | 601,948 | 86,391   | 584,974                      | 30,418          | 77,957            | 26,595               | 1,172     | 494,363    | 8,310        | 31,010 |
| 3          | 29,081 | 537,186 | 72,324   | 523,040                      | 22,196          | 65,046            | 19,154               | 841       | 366,810    | 6,773        | 25,803 |
| 4          | 25,089 | 464,994 | 60,312   | 453,984                      | 22,766          | 55,447            | 20,455               | 1,134     | 470,687    | 6,493        | 21,576 |
| 5          | 25,110 | 432,497 | 62,645   | 420,656                      | 22,817          | 56,980            | 20,382               | 754       | 403,281    | 5,557        | 22,087 |
| 6          | 24,482 | 374,422 | 58,203   | 364,227                      | 25,192          | 53,068            | 22,621               | 783       | 398,772    | 5,977        | 20,678 |
| 7          | 24,634 | 409,200 | 61,032   | 397,897                      | 22,487          | 54,980            | 19,698               | 754       | 290,680    | 5,837        | 21,499 |
| 8          | 20,216 | 375,264 | 53,245   | 365,652                      | 18,505          | 48,140            | 16,305               | 613       | 282,279    | 4,342        | 17,954 |
| 9          | 19,372 | 247,475 | 45,288   | 240,053                      | 19,881          | 40,877            | 17,516               | 700       | 274,776    | 5,237        | 16,128 |
| 10         | 19,329 | 313,174 | 47,421   | 305,394                      | 18,241          | 43,387            | 16,228               | 672       | 260,403    | 4,878        | 16,135 |
| 11         | 27,025 | 327,418 | 67,642   | 313,973                      | 25,421          | 59,227            | 21,826               | 766       | 236,685    | 7,392        | 23,099 |
| 12         | 25,471 | 342,957 | 64,836   | 330,163                      | 20,081          | 57,302            | 16,865               | 719       | 236,819    | 6,306        | 22,240 |
| 13         | 9,610  | 187,158 | 25,229   | 183,771                      | 10,981          | 23,505            | 10,179               | 409       | 291,222    | 2,250        | 8,110  |
| 14         | 16,130 | 229,886 | 44,232   | 221,658                      | 15,834          | 39,286            | 13,859               | 461       | 162,472    | 3,956        | 14,083 |
| 15         | 17,885 | 237,556 | 44,912   | 228,224                      | 13,218          | 39,732            | 11,022               | 520       | 105,553    | 4,203        | 15,763 |
| 16         | 20,703 | 187,554 | 48,469   | 176,671                      | 15,854          | 40,266            | 12,249               | 631       | 121,786    | 5,859        | 18,245 |
| 17         | 24,625 | 193,888 | 56,806   | 180,946                      | 17,192          | 47,170            | 13,262               | 557       | 100,094    | 7,025        | 21,452 |
| 18         | 9,497  | 177,906 | 26,285   | 173,316                      | 8,764           | 24,019            | 7,749                | 274       | 173,458    | 1,980        | 8,449  |
| 19         | 25,701 | 128,582 | 52,511   | 115,461                      | 19,346          | 42,735            | 15,107               | 651       | 56,520     | 9,510        | 20,427 |
| 20         | 10,478 | 128,166 | 24,570   | 124,203                      | 10,580          | 21,936            | 9,188                | 397       | 107,793    | 3,178        | 8,334  |
| 21         | 5,939  | 84,144  | 15,806   | 81,216                       | 6,778           | 14,478            | 6,196                | 170       | 78,895     | 1,263        | 5,256  |
| 22         | 10,759 | 81,843  | 23,341   | 77,191                       | 9,589           | 20,070            | 7,963                | 333       | 40,720     | 2,926        | 9,136  |
| X          | 17,474 | 256,683 | 39,923   | 250,753                      | 21,737          | 36,963            | 19,992               | 762       | 452,750    | 4,863        | 13,846 |
| Y          | 2,199  | 29,049  | 6,767    | 28,535                       | 5,074           | 6,406             | 4,811                | 238       | 75,449     | 263          | 2,058  |

**Distribution of Palindromes in non-coding regions**

| <b>Chromosome</b> | <b>LincRNA</b> | <b>SnoRNA/miRNA</b> | <b>CpG islands</b> | <b>TFBS</b> |
|-------------------|----------------|---------------------|--------------------|-------------|
| 1                 | 69,145         | 37                  | 11,662             | 136,699     |
| 2                 | 95,612         | 23                  | 7,948              | 123,485     |
| 3                 | 74,725         | 20                  | 5,651              | 96,533      |
| 4                 | 103,683        | 8                   | 4,477              | 88,102      |
| 5                 | 76,994         | 11                  | 5,897              | 88,253      |
| 6                 | 54,534         | 9                   | 5,592              | 96,158      |
| 7                 | 55,878         | 9                   | 7,039              | 82,483      |
| 8                 | 37,873         | 20                  | 5,423              | 70,538      |
| 9                 | 46,416         | 9                   | 6,013              | 60,767      |
| 10                | 40,144         | 15                  | 6,230              | 71,554      |
| 11                | 26,018         | 18                  | 6,559              | 71,007      |
| 12                | 31,398         | 30                  | 5,299              | 72,801      |
| 13                | 35,562         | 3                   | 2,815              | 42,857      |
| 14                | 23,243         | 27                  | 3,913              | 46,952      |
| 15                | 28,216         | 11                  | 4,229              | 45,408      |
| 16                | 24,795         | 27                  | 6,868              | 49,569      |
| 17                | 15,870         | 32                  | 7,335              | 57,775      |
| 18                | 20,767         | 5                   | 2,916              | 34,012      |
| 19                | 12,106         | 53                  | 9,651              | 43,916      |
| 20                | 16,131         | 22                  | 4,050              | 45,472      |
| 21                | 21,455         | 2                   | 1,611              | 19,631      |
| 22                | 9,549          | 0                   | 3,789              | 28,228      |
| X                 | 31,989         | 29                  | 3,282              | 41,530      |
| Y                 | 6,967          | No Sno/miRNA        | 226                | 790         |
