# Supplementary material for: A reference catalog of DNA palindromes in the human genome and their variations in 1000 Genomes
Source: PubMed Central journal article supplement (PMC7680136; doi:10.1038/s41439-020-00127-5), 2020-11-20
Supplement: 41439_2020_127_MOESM3_ESM.pdf [file 41439_2020_127_MOESM3_ESM.pdf]

**Supplementary Table 3.**

Intentionally left blank.

A large data file of catalog of palindromes will be uploaded at the time of publication.
