# Supplementary material for: A reference catalog of DNA palindromes in the human genome and their variations in 1000 Genomes
Source: PubMed Central journal article supplement (PMC7680136; doi:10.1038/s41439-020-00127-5), 2020-11-20
Supplement: 41439_2020_127_MOESM4_ESM.pdf [file 41439_2020_127_MOESM4_ESM.pdf]

| 1000 Genomes Sample ID | No.of Identical palindromes | No.of Smaller palindromes | No.of longer palindromes | No.of Different palindromes |
|------------------------|-----------------------------|---------------------------|--------------------------|-----------------------------|
| HG03270                | 14,293,757                  | 276,771                   | 141,278                  | 240,875                     |
| NA19676                | 14,474,629                  | 242,601                   | 126,320                  | 206,619                     |
| HG03271                | 14,415,698                  | 268,027                   | 134,635                  | 230,908                     |
| HG03279                | 14,296,665                  | 274,610                   | 140,813                  | 240,177                     |
| NA19679                | 14,509,763                  | 233,395                   | 118,420                  | 194,256                     |
| NA19678                | 14,384,836                  | 244,544                   | 125,719                  | 205,686                     |
| HG01398                | 14,473,653                  | 243,314                   | 125,461                  | 207,625                     |
| HG01390                | 14,352,161                  | 255,776                   | 131,826                  | 217,639                     |
| HG01393                | 14,375,600                  | 248,428                   | 126,699                  | 210,374                     |
| HG01392                | 14,465,859                  | 247,527                   | 126,518                  | 210,260                     |
| HG01395                | 14,477,802                  | 242,189                   | 124,119                  | 205,578                     |
| HG01396                | 14,380,642                  | 246,811                   | 125,561                  | 208,527                     |
| HG00421                | 14,490,315                  | 237,386                   | 121,896                  | 201,045                     |
| HG00422                | 14,410,460                  | 236,502                   | 119,296                  | 196,951                     |
| HG00428                | 14,412,177                  | 235,611                   | 119,433                  | 196,784                     |
| NA19773                | 14,395,616                  | 241,602                   | 123,505                  | 201,834                     |
| HG02477                | 14,301,064                  | 273,811                   | 139,887                  | 237,984                     |
| HG02476                | 14,297,373                  | 274,693                   | 140,290                  | 238,298                     |
| HG02471                | 14,288,243                  | 277,576                   | 143,260                  | 241,734                     |
| HG02470                | 14,394,112                  | 274,817                   | 139,656                  | 236,447                     |
| NA20808                | 14,406,221                  | 235,708                   | 121,159                  | 198,567                     |
| HG02479                | 14,293,710                  | 276,240                   | 140,827                  | 239,439                     |
| HG02277                | 14,510,052                  | 232,513                   | 118,934                  | 195,082                     |
| HG02275                | 14,426,417                  | 229,396                   | 117,485                  | 191,934                     |
| HG02274                | 14,468,133                  | 249,175                   | 126,496                  | 210,280                     |
| HG01260                | 14,379,174                  | 247,176                   | 126,781                  | 209,126                     |
| HG02271                | 14,499,581                  | 233,131                   | 120,987                  | 197,626                     |
| HG01269                | 14,386,215                  | 242,239                   | 125,832                  | 205,461                     |
| HG02278                | 14,419,350                  | 232,291                   | 118,093                  | 194,805                     |
| HG01067                | 14,394,826                  | 240,884                   | 123,645                  | 203,133                     |
| NA19074                | 14,412,933                  | 234,974                   | 119,981                  | 197,381                     |
| NA19077                | 14,407,351                  | 237,030                   | 121,119                  | 198,146                     |
| HG01064                | 14,381,453                  | 246,348                   | 125,371                  | 207,979                     |
| HG01063                | 14,457,428                  | 251,918                   | 127,076                  | 213,090                     |
| NA19070                | 14,507,751                  | 234,089                   | 118,491                  | 195,628                     |
| HG01061                | 14,389,225                  | 243,855                   | 124,019                  | 203,843                     |
| NA19072                | 14,503,405                  | 234,130                   | 119,977                  | 196,678                     |
| NA19079                | 14,512,947                  | 232,464                   | 117,346                  | 194,411                     |
| NA19078                | 14,409,634                  | 235,437                   | 120,097                  | 197,822                     |
| HG01069                | 14,489,238                  | 241,753                   | 122,078                  | 201,501                     |
| HG02512                | 14,508,842                  | 232,011                   | 118,150                  | 195,469                     |
| HG02513                | 14,409,548                  | 235,701                   | 120,456                  | 198,351                     |
| HG02511                | 14,294,594                  | 276,553                   | 141,309                  | 238,649                     |
| HG03018                | 14,477,471                  | 242,436                   | 125,071                  | 205,353                     |
| HG03019                | 14,402,612                  | 238,561                   | 121,587                  | 199,570                     |
| HG03012                | 14,500,698                  | 237,405                   | 119,570                  | 198,408                     |
| HG03015                | 14,501,051                  | 236,197                   | 119,715                  | 197,907                     |
| HG03016                | 14,395,520                  | 241,905                   | 123,104                  | 202,639                     |
| HG00280                | 14,490,551                  | 237,669                   | 122,808                  | 201,686                     |
| HG00281                | 14,410,970                  | 235,609                   | 120,649                  | 197,475                     |
| HG00282                | 14,404,810                  | 237,952                   | 121,424                  | 198,653                     |
| NA11919                | 14,497,608                  | 236,346                   | 121,426                  | 199,538                     |
| HG00284                | 14,509,082                  | 232,635                   | 119,015                  | 195,271                     |
| HG00285                | 14,413,876                  | 234,913                   | 119,624                  | 196,623                     |
| HG00288                | 14,404,731                  | 236,850                   | 123,101                  | 199,698                     |
| HG02604                | 14,412,797                  | 234,073                   | 121,498                  | 196,771                     |
| HG02603                | 14,490,986                  | 239,373                   | 123,298                  | 200,961                     |
| HG02600                | 14,469,677                  | 244,950                   | 127,764                  | 207,946                     |
| HG02601                | 14,381,163                  | 246,183                   | 127,916                  | 207,044                     |
| HG03705                | 14,499,343                  | 237,746                   | 119,586                  | 197,880                     |
| HG03706                | 14,399,478                  | 240,075                   | 121,918                  | 201,021                     |
| HG03702                | 14,495,676                  | 238,283                   | 121,243                  | 200,704                     |
| HG03703                | 14,396,057                  | 240,780                   | 123,469                  | 202,073                     |
| HG03708                | 14,479,877                  | 241,565                   | 124,744                  | 205,630                     |
| HG03709                | 14,393,080                  | 241,783                   | 124,345                  | 202,798                     |
| HG01885                | 14,414,469                  | 268,850                   | 134,940                  | 230,587                     |
| HG01886                | 14,283,711                  | 280,341                   | 144,859                  | 243,715                     |
| HG01880                | 14,319,554                  | 267,674                   | 137,734                  | 231,163                     |

|         |            |         |         |         |
|---------|------------|---------|---------|---------|
| HG01883 | 14,297,362 | 275,887 | 140,498 | 238,291 |
| HG01882 | 14,398,722 | 272,773 | 137,838 | 236,980 |
| HG01080 | 14,387,966 | 243,285 | 125,068 | 206,120 |
| HG01889 | 14,242,011 | 281,193 | 145,342 | 282,349 |
| HG03649 | 14,494,164 | 238,717 | 121,200 | 200,637 |
| HG03640 | 14,394,712 | 241,099 | 123,346 | 202,856 |
| HG03643 | 14,389,928 | 243,654 | 125,244 | 204,428 |
| HG03642 | 14,385,718 | 244,089 | 126,354 | 205,766 |
| HG03645 | 14,398,457 | 239,345 | 122,165 | 201,361 |
| HG03644 | 14,466,610 | 246,222 | 128,089 | 208,705 |
| HG03646 | 14,500,995 | 236,495 | 120,052 | 197,914 |
| HG00268 | 14,410,663 | 235,814 | 119,998 | 197,536 |
| HG00542 | 14,508,482 | 233,361 | 118,001 | 194,485 |
| HG04042 | 14,402,704 | 237,714 | 121,857 | 200,689 |
| HG04047 | 14,396,313 | 241,119 | 122,219 | 201,805 |
| HG03803 | 14,494,994 | 239,048 | 121,658 | 199,744 |
| HG03802 | 14,391,464 | 242,583 | 125,083 | 204,909 |
| HG03800 | 14,492,776 | 239,973 | 122,140 | 200,687 |
| HG03805 | 14,399,813 | 238,858 | 122,646 | 201,801 |
| HG03809 | 14,476,965 | 232,259 | 117,119 | 231,736 |
| HG03808 | 14,400,275 | 239,243 | 122,010 | 201,502 |
| HG03548 | 14,288,813 | 278,164 | 141,849 | 244,337 |
| HG02860 | 14,396,982 | 273,150 | 138,596 | 237,494 |
| HG02861 | 14,298,135 | 275,478 | 140,585 | 239,011 |
| NA20581 | 14,504,739 | 233,661 | 119,848 | 197,591 |
| NA20582 | 14,419,701 | 232,525 | 119,533 | 195,564 |
| NA20585 | 14,417,685 | 233,206 | 118,789 | 194,593 |
| HG03625 | 14,414,259 | 233,810 | 119,264 | 195,596 |
| NA20587 | 14,400,592 | 239,189 | 123,672 | 200,995 |
| NA20586 | 14,489,829 | 237,384 | 123,338 | 201,180 |
| NA20589 | 14,404,594 | 237,361 | 121,757 | 199,700 |
| NA20588 | 14,488,213 | 237,891 | 123,435 | 203,160 |
| HG03624 | 14,480,694 | 240,917 | 125,039 | 204,456 |
| NA18553 | 14,404,264 | 238,791 | 121,259 | 199,392 |
| HG04134 | 14,481,342 | 240,203 | 124,396 | 204,748 |
| HG00129 | 14,513,216 | 231,384 | 117,540 | 193,955 |
| HG00128 | 14,413,664 | 233,990 | 119,805 | 197,145 |
| HG04131 | 14,492,995 | 238,650 | 121,611 | 200,344 |
| HG00125 | 14,410,912 | 235,448 | 120,268 | 197,935 |
| HG00127 | 14,410,923 | 234,260 | 121,956 | 196,996 |
| HG00126 | 14,490,192 | 236,225 | 123,720 | 201,166 |
| HG00121 | 14,418,473 | 232,075 | 119,395 | 195,721 |
| HG00120 | 14,410,649 | 235,753 | 120,402 | 197,476 |
| HG00123 | 14,405,797 | 237,730 | 121,436 | 198,362 |
| HG00122 | 14,410,807 | 235,788 | 120,449 | 196,630 |
| HG01468 | 14,423,730 | 230,987 | 117,213 | 194,085 |
| NA18557 | 14,506,507 | 233,630 | 119,045 | 195,161 |
| HG01462 | 14,364,640 | 252,021 | 128,779 | 214,107 |
| HG01461 | 14,479,564 | 244,794 | 123,243 | 205,803 |
| HG01465 | 14,411,113 | 235,353 | 119,338 | 197,827 |
| HG01464 | 14,468,569 | 248,262 | 126,259 | 209,065 |
| NA20127 | 14,295,279 | 276,076 | 142,493 | 240,106 |
| NA20126 | 14,410,093 | 267,842 | 136,906 | 230,943 |
| NA20832 | 14,410,479 | 235,971 | 120,088 | 197,655 |
| HG00638 | 14,372,798 | 248,158 | 128,242 | 211,898 |
| HG00631 | 14,501,808 | 235,864 | 121,227 | 197,095 |
| HG00632 | 14,403,464 | 238,688 | 122,695 | 199,696 |
| HG00634 | 14,506,830 | 233,708 | 119,783 | 195,300 |
| HG00637 | 14,489,427 | 241,405 | 122,195 | 202,933 |
| HG02282 | 14,285,876 | 278,511 | 144,769 | 241,624 |
| HG02283 | 14,414,001 | 268,380 | 135,473 | 231,608 |
| HG02281 | 14,407,604 | 272,076 | 137,011 | 233,223 |
| HG02286 | 14,410,245 | 235,189 | 119,949 | 198,271 |
| HG02284 | 14,415,256 | 268,406 | 134,896 | 229,912 |
| HG02285 | 14,491,751 | 236,480 | 122,813 | 200,088 |
| NA20905 | 14,497,280 | 237,573 | 120,260 | 199,323 |
| NA20904 | 14,481,838 | 240,940 | 124,221 | 204,418 |
| HG01098 | 14,390,754 | 242,548 | 124,601 | 204,425 |
| NA20906 | 14,398,393 | 239,427 | 122,644 | 202,029 |

|         |            |         |         |         |
|---------|------------|---------|---------|---------|
| HG02048 | 14,391,588 | 242,987 | 125,215 | 203,149 |
| NA20900 | 14,397,802 | 239,835 | 123,784 | 203,568 |
| NA20903 | 14,499,407 | 236,664 | 121,020 | 198,775 |
| NA20902 | 14,399,947 | 239,143 | 122,552 | 200,863 |
| HG01092 | 14,371,745 | 250,318 | 127,746 | 211,706 |
| HG02047 | 14,509,043 | 234,030 | 118,167 | 195,158 |
| HG02040 | 14,508,186 | 234,113 | 118,061 | 195,393 |
| NA20908 | 14,399,012 | 239,749 | 122,329 | 202,224 |
| HG01094 | 14,489,313 | 240,818 | 121,654 | 203,175 |
| HG01095 | 14,381,368 | 245,584 | 127,003 | 207,973 |
| HG00705 | 14,409,362 | 236,363 | 119,935 | 197,508 |
| HG00704 | 14,510,700 | 233,193 | 117,626 | 193,784 |
| HG00707 | 14,510,470 | 232,994 | 117,925 | 193,881 |
| HG00701 | 14,503,942 | 234,462 | 119,360 | 196,730 |
| NA19682 | 14,491,771 | 238,129 | 122,488 | 200,954 |
| NA19681 | 14,392,859 | 240,957 | 123,559 | 202,739 |
| HG00708 | 14,408,817 | 236,061 | 120,454 | 198,175 |
| NA19684 | 14,397,507 | 240,566 | 123,099 | 201,753 |
| HG03095 | 14,288,954 | 278,180 | 141,227 | 242,612 |
| NA19118 | 14,297,442 | 274,520 | 140,743 | 239,798 |
| NA19119 | 14,398,957 | 273,197 | 138,220 | 234,995 |
| NA19448 | 14,417,242 | 268,526 | 134,701 | 228,811 |
| NA19449 | 14,297,146 | 275,741 | 140,176 | 238,860 |
| NA19445 | 14,293,781 | 276,700 | 140,466 | 240,068 |
| NA19446 | 14,292,116 | 276,762 | 142,160 | 241,088 |
| NA19440 | 14,293,647 | 277,036 | 142,252 | 240,604 |
| NA19117 | 14,418,662 | 267,886 | 133,660 | 229,452 |
| NA19114 | 14,290,053 | 276,926 | 143,280 | 241,731 |
| NA19443 | 14,396,509 | 273,856 | 138,288 | 236,328 |
| NA19664 | 14,482,035 | 240,943 | 123,791 | 204,509 |
| NA19661 | 14,492,207 | 240,167 | 122,234 | 200,319 |
| NA19663 | 14,402,792 | 238,912 | 121,509 | 200,221 |
| HG03247 | 14,293,516 | 276,945 | 140,965 | 240,116 |
| HG03246 | 14,420,361 | 266,763 | 133,213 | 228,561 |
| HG03241 | 14,288,218 | 278,876 | 142,697 | 243,188 |
| HG03240 | 14,414,971 | 269,016 | 134,740 | 230,657 |
| HG03428 | 14,291,952 | 277,424 | 141,713 | 241,560 |
| HG01384 | 14,393,818 | 240,663 | 123,506 | 202,809 |
| HG01383 | 14,498,842 | 236,720 | 120,890 | 198,604 |
| HG01389 | 14,481,306 | 236,379 | 120,610 | 216,697 |
| NA18648 | 14,510,821 | 232,393 | 118,357 | 194,268 |
| NA18645 | 14,510,490 | 232,550 | 117,742 | 194,689 |
| NA18644 | 14,412,416 | 234,861 | 119,779 | 197,075 |
| NA18647 | 14,466,696 | 233,317 | 119,240 | 234,560 |
| NA18646 | 14,410,480 | 235,190 | 120,738 | 197,564 |
| NA18641 | 14,411,035 | 236,043 | 120,042 | 197,117 |
| NA18640 | 14,411,113 | 235,376 | 120,228 | 197,921 |
| NA18643 | 14,510,796 | 231,972 | 118,089 | 195,581 |
| NA18642 | 14,410,693 | 235,932 | 120,192 | 197,649 |
| NA19206 | 14,294,896 | 276,604 | 141,013 | 239,785 |
| HG00410 | 14,397,216 | 240,656 | 124,172 | 201,451 |
| NA19204 | 14,286,403 | 279,108 | 143,794 | 242,902 |
| NA19200 | 14,392,412 | 274,306 | 140,638 | 237,529 |
| NA19201 | 14,296,598 | 275,692 | 140,541 | 238,964 |
| HG00419 | 14,407,537 | 237,206 | 120,475 | 198,582 |
| HG02374 | 14,488,748 | 237,759 | 122,811 | 202,955 |
| NA19209 | 14,293,627 | 276,596 | 141,586 | 240,573 |
| HG02375 | 14,487,354 | 239,351 | 122,176 | 202,644 |
| HG02462 | 14,283,609 | 279,885 | 145,856 | 243,657 |
| HG02461 | 14,412,983 | 270,084 | 135,918 | 230,467 |
| HG02464 | 14,391,006 | 275,293 | 140,363 | 238,407 |
| HG02465 | 14,282,958 | 279,843 | 145,549 | 243,696 |
| HG01272 | 14,380,326 | 247,116 | 125,069 | 208,378 |
| HG02265 | 14,526,271 | 226,230 | 115,002 | 189,262 |
| HG02266 | 14,428,171 | 229,225 | 117,062 | 191,381 |
| HG01271 | 14,489,989 | 239,831 | 121,294 | 202,563 |
| HG02260 | 14,417,003 | 232,936 | 119,123 | 195,096 |
| HG01277 | 14,508,754 | 234,063 | 118,276 | 195,621 |
| HG02262 | 14,489,463 | 236,731 | 123,302 | 201,654 |

|         |            |         |         |         |
|---------|------------|---------|---------|---------|
| HG01275 | 14,414,987 | 233,431 | 119,529 | 195,264 |
| HG03391 | 14,406,295 | 272,064 | 135,992 | 233,733 |
| HG03397 | 14,403,856 | 273,151 | 137,455 | 234,318 |
| HG03394 | 14,410,891 | 270,473 | 135,676 | 232,601 |
| NA19062 | 14,507,623 | 233,721 | 118,878 | 195,895 |
| NA19063 | 14,487,917 | 239,138 | 122,771 | 201,846 |
| NA19060 | 14,489,473 | 238,453 | 122,614 | 201,675 |
| HG01077 | 14,370,801 | 248,908 | 127,874 | 211,711 |
| NA19066 | 14,484,014 | 240,235 | 124,413 | 202,963 |
| NA19067 | 14,501,044 | 235,411 | 120,228 | 197,909 |
| NA19064 | 14,405,597 | 237,682 | 121,393 | 198,893 |
| HG01073 | 14,395,454 | 241,867 | 123,082 | 203,081 |
| NA19068 | 14,500,471 | 237,655 | 120,529 | 196,941 |
| HG01079 | 14,483,270 | 243,667 | 122,589 | 204,441 |
| HG04238 | 14,497,987 | 236,563 | 120,631 | 199,501 |
| HG03025 | 14,297,901 | 274,918 | 140,618 | 240,792 |
| HG03024 | 14,401,636 | 271,643 | 137,637 | 235,432 |
| HG03027 | 14,410,627 | 270,898 | 136,579 | 231,464 |
| HG03021 | 14,497,703 | 237,302 | 120,615 | 198,796 |
| HG03022 | 14,410,401 | 235,374 | 119,966 | 197,914 |
| HG03028 | 14,282,391 | 279,259 | 146,058 | 245,408 |
| HG02676 | 14,284,341 | 279,646 | 145,358 | 243,741 |
| HG02675 | 14,389,671 | 275,657 | 141,276 | 238,492 |
| HG02679 | 14,281,644 | 281,298 | 146,680 | 244,841 |
| HG02678 | 14,422,220 | 266,860 | 134,425 | 228,087 |
| HG03731 | 14,389,917 | 242,275 | 125,484 | 203,964 |
| HG03730 | 14,389,976 | 242,796 | 125,206 | 204,112 |
| HG03733 | 14,409,692 | 235,787 | 120,179 | 198,777 |
| HG03736 | 14,400,050 | 239,508 | 122,084 | 201,895 |
| HG03738 | 14,505,157 | 233,769 | 119,294 | 196,908 |
| NA12814 | 14,494,135 | 235,800 | 122,047 | 200,710 |
| NA12815 | 14,412,059 | 235,548 | 119,496 | 196,939 |
| NA12812 | 14,499,164 | 235,926 | 120,301 | 198,517 |
| NA12813 | 14,411,120 | 235,618 | 120,246 | 197,276 |
| HG00273 | 14,508,896 | 233,473 | 118,500 | 195,481 |
| HG03944 | 14,402,823 | 237,837 | 121,643 | 200,464 |
| HG01892 | 14,475,103 | 242,186 | 126,423 | 206,310 |
| HG01893 | 14,384,094 | 244,666 | 125,313 | 206,571 |
| HG01890 | 14,412,112 | 270,076 | 135,866 | 231,135 |
| HG00368 | 14,406,369 | 236,685 | 121,933 | 199,646 |
| HG03652 | 14,491,447 | 240,390 | 122,295 | 200,423 |
| HG03653 | 14,392,650 | 242,331 | 123,396 | 203,297 |
| HG01894 | 14,299,254 | 274,491 | 140,876 | 238,542 |
| HG00381 | 14,414,784 | 234,186 | 119,736 | 196,444 |
| HG03829 | 14,399,457 | 239,038 | 122,475 | 201,315 |
| HG00383 | 14,415,521 | 234,165 | 118,869 | 195,925 |
| HG00382 | 14,512,529 | 232,021 | 118,247 | 193,798 |
| HG00384 | 14,409,670 | 236,002 | 120,688 | 198,212 |
| HG00272 | 14,408,089 | 236,208 | 121,145 | 198,260 |
| NA18934 | 14,410,405 | 270,398 | 135,633 | 231,412 |
| NA18933 | 14,292,772 | 276,453 | 142,253 | 240,113 |
| HG03539 | 14,298,444 | 274,408 | 140,966 | 238,336 |
| HG00187 | 14,507,009 | 232,975 | 119,795 | 195,968 |
| HG03538 | 14,402,506 | 270,757 | 137,422 | 234,408 |
| HG02703 | 14,286,183 | 279,108 | 145,006 | 242,648 |
| HG02702 | 14,410,546 | 270,895 | 136,973 | 231,889 |
| NA18939 | 14,410,276 | 235,292 | 119,667 | 198,259 |
| HG02700 | 14,400,410 | 239,562 | 122,240 | 200,705 |
| NA11894 | 14,409,163 | 235,458 | 120,818 | 198,565 |
| NA11893 | 14,507,073 | 233,738 | 119,367 | 196,050 |
| NA11892 | 14,409,708 | 236,368 | 121,106 | 198,414 |
| HG03949 | 14,401,746 | 238,522 | 121,602 | 200,057 |
| HG00257 | 14,410,522 | 236,840 | 119,601 | 197,300 |
| HG00256 | 14,507,922 | 234,072 | 118,613 | 195,602 |
| HG00255 | 14,405,756 | 237,547 | 121,899 | 199,074 |
| HG00254 | 14,412,282 | 234,491 | 120,085 | 197,435 |
| HG00253 | 14,409,573 | 235,902 | 120,426 | 198,228 |
| HG00252 | 14,511,916 | 232,177 | 117,656 | 193,677 |
| HG00251 | 14,511,589 | 232,697 | 118,378 | 195,133 |

|         |            |         |         |         |
|---------|------------|---------|---------|---------|
| HG03817 | 14,404,029 | 237,924 | 121,130 | 199,835 |
| HG00259 | 14,409,170 | 236,171 | 120,758 | 198,735 |
| HG00258 | 14,410,627 | 236,350 | 120,210 | 197,173 |
| HG02819 | 14,416,069 | 268,959 | 134,197 | 231,053 |
| HG02813 | 14,420,109 | 267,027 | 133,708 | 229,836 |
| HG02811 | 14,289,154 | 279,067 | 142,253 | 242,272 |
| HG02810 | 14,424,544 | 265,300 | 134,010 | 226,806 |
| HG02817 | 14,298,991 | 274,557 | 140,227 | 238,938 |
| HG02816 | 14,415,947 | 269,421 | 134,248 | 230,254 |
| HG02814 | 14,293,704 | 276,523 | 141,187 | 241,214 |
| HG00138 | 14,490,595 | 237,486 | 122,436 | 201,306 |
| HG04140 | 14,498,933 | 237,462 | 119,708 | 197,927 |
| HG04146 | 14,489,434 | 239,491 | 122,236 | 201,866 |
| HG04144 | 14,392,324 | 242,129 | 123,717 | 203,292 |
| HG00132 | 14,408,235 | 235,961 | 121,440 | 198,277 |
| HG00133 | 14,403,910 | 238,596 | 121,201 | 198,841 |
| HG00130 | 14,416,455 | 232,623 | 118,829 | 196,685 |
| HG00131 | 14,492,184 | 236,093 | 122,456 | 200,626 |
| HG00136 | 14,507,602 | 233,612 | 119,176 | 195,925 |
| HG00137 | 14,419,706 | 232,254 | 118,692 | 194,363 |
| HG02272 | 14,432,563 | 226,384 | 116,144 | 189,468 |
| HG01479 | 14,504,878 | 234,582 | 119,209 | 196,378 |
| HG01474 | 14,402,038 | 237,942 | 121,939 | 199,748 |
| HG02923 | 14,409,972 | 271,301 | 136,868 | 231,819 |
| HG02922 | 14,279,705 | 281,982 | 146,321 | 244,859 |
| HG02807 | 14,406,343 | 273,156 | 137,606 | 232,792 |
| NA20826 | 14,406,433 | 236,936 | 121,541 | 198,869 |
| NA20827 | 14,508,808 | 233,058 | 118,613 | 194,767 |
| NA20822 | 14,399,576 | 238,981 | 124,226 | 202,392 |
| NA20821 | 14,399,086 | 239,248 | 124,355 | 200,997 |
| NA20828 | 14,410,573 | 235,509 | 120,792 | 198,553 |
| HG00626 | 14,414,476 | 233,765 | 119,971 | 197,463 |
| HG00625 | 14,511,338 | 231,750 | 118,559 | 194,632 |
| HG00622 | 14,482,760 | 240,667 | 124,934 | 203,194 |
| HG00623 | 14,401,899 | 238,434 | 123,016 | 200,758 |
| HG00620 | 14,409,202 | 236,409 | 120,519 | 197,936 |
| HG01710 | 14,404,049 | 237,427 | 121,294 | 200,131 |
| HG00628 | 14,511,820 | 232,139 | 118,605 | 194,387 |
| HG00629 | 14,410,438 | 235,330 | 121,542 | 198,101 |
| HG02131 | 14,500,963 | 236,022 | 120,025 | 197,828 |
| HG04090 | 14,400,235 | 239,462 | 121,651 | 201,037 |
| HG04093 | 14,466,986 | 234,205 | 119,505 | 234,426 |
| HG04094 | 14,500,292 | 236,948 | 119,730 | 197,654 |
| HG04096 | 14,486,508 | 238,473 | 123,331 | 203,146 |
| HG04099 | 14,399,561 | 239,050 | 122,105 | 201,972 |
| HG04098 | 14,478,160 | 242,427 | 124,880 | 205,217 |
| NA20895 | 14,501,279 | 235,657 | 119,972 | 198,205 |
| HG02079 | 14,500,163 | 236,772 | 121,058 | 197,808 |
| HG02078 | 14,400,976 | 239,509 | 122,638 | 200,145 |
| NA20910 | 14,400,969 | 237,500 | 123,042 | 201,467 |
| NA20911 | 14,499,238 | 237,039 | 120,375 | 198,547 |
| HG02070 | 14,499,593 | 237,161 | 120,792 | 197,095 |
| HG02073 | 14,484,384 | 241,051 | 123,490 | 203,226 |
| HG02072 | 14,394,704 | 242,208 | 123,790 | 202,094 |
| HG02075 | 14,398,281 | 239,989 | 123,259 | 201,574 |
| HG00335 | 14,455,609 | 236,711 | 122,203 | 238,593 |
| HG02076 | 14,489,046 | 238,796 | 123,663 | 201,218 |
| HG01669 | 14,504,601 | 234,810 | 119,539 | 197,015 |
| HG01668 | 14,410,297 | 234,602 | 120,358 | 198,540 |
| HG00717 | 14,409,916 | 236,297 | 119,507 | 197,269 |
| NA20890 | 14,503,881 | 234,975 | 119,598 | 197,638 |
| HG04152 | 14,478,922 | 241,176 | 125,116 | 205,289 |
| HG04153 | 14,397,226 | 241,063 | 122,673 | 202,737 |
| NA19471 | 14,294,312 | 277,085 | 140,598 | 240,617 |
| NA19473 | 14,296,180 | 275,659 | 140,684 | 239,463 |
| NA19472 | 14,292,483 | 276,309 | 141,965 | 241,274 |
| NA19475 | 14,290,205 | 277,914 | 141,425 | 241,700 |
| NA19474 | 14,295,631 | 276,594 | 140,558 | 238,968 |
| HG04155 | 14,498,839 | 236,748 | 120,832 | 198,833 |

|         |            |         |         |         |
|---------|------------|---------|---------|---------|
| NA19651 | 14,394,734 | 241,618 | 122,446 | 202,719 |
| HG02382 | 14,486,392 | 239,412 | 122,522 | 202,215 |
| HG03258 | 14,409,067 | 271,910 | 136,301 | 231,955 |
| NA19652 | 14,496,493 | 238,994 | 120,589 | 199,064 |
| NA19655 | 14,499,347 | 236,669 | 120,242 | 198,196 |
| NA19654 | 14,395,360 | 241,960 | 123,548 | 202,453 |
| NA19309 | 14,397,083 | 272,616 | 139,222 | 237,227 |
| NA19308 | 14,395,403 | 273,417 | 138,908 | 237,909 |
| NA19307 | 14,392,215 | 274,655 | 140,010 | 238,015 |
| NA19658 | 14,501,932 | 236,143 | 119,438 | 197,621 |
| HG02389 | 14,510,966 | 232,493 | 117,858 | 194,886 |
| NA11918 | 14,408,611 | 235,766 | 120,777 | 198,476 |
| HG01101 | 14,466,333 | 247,553 | 127,306 | 209,976 |
| NA21087 | 14,498,328 | 238,183 | 120,055 | 198,378 |
| NA21086 | 14,399,500 | 240,312 | 122,296 | 200,986 |
| HG01102 | 14,382,379 | 245,394 | 125,852 | 208,098 |
| NA12829 | 14,507,991 | 233,764 | 118,900 | 195,692 |
| HG03086 | 14,286,746 | 279,163 | 142,537 | 243,007 |
| NA21088 | 14,400,174 | 239,496 | 121,924 | 200,854 |
| NA19783 | 14,505,746 | 234,610 | 119,365 | 195,513 |
| NA19782 | 14,392,589 | 242,695 | 123,978 | 203,647 |
| NA19780 | 14,497,864 | 238,306 | 120,167 | 198,615 |
| NA19786 | 14,501,579 | 235,952 | 120,236 | 198,277 |
| NA19785 | 14,395,595 | 240,590 | 123,646 | 203,078 |
| NA19789 | 14,564,596 | 245,073 | 126,216 | 207,387 |
| NA19788 | 14,392,786 | 243,379 | 123,652 | 202,850 |
| HG00409 | 14,503,733 | 236,239 | 120,078 | 196,654 |
| HG00406 | 14,509,200 | 232,889 | 117,714 | 194,931 |
| HG00407 | 14,407,424 | 236,518 | 120,522 | 198,499 |
| HG00404 | 14,408,104 | 236,090 | 121,675 | 198,720 |
| HG00403 | 14,490,317 | 236,850 | 123,442 | 201,525 |
| HG04019 | 14,480,289 | 240,217 | 124,882 | 205,383 |
| NA20517 | 14,409,121 | 235,635 | 121,406 | 198,132 |
| HG00331 | 14,410,700 | 235,555 | 120,522 | 197,277 |
| HG02497 | 14,296,185 | 276,221 | 140,723 | 239,018 |
| HG02496 | 14,420,340 | 267,317 | 133,428 | 228,037 |
| HG02494 | 14,396,719 | 240,388 | 123,699 | 201,817 |
| HG02493 | 14,494,681 | 238,389 | 121,508 | 200,170 |
| HG02491 | 14,392,584 | 241,920 | 125,216 | 203,280 |
| HG02490 | 14,481,436 | 240,657 | 125,120 | 204,164 |
| HG03388 | 14,406,382 | 270,922 | 136,290 | 232,842 |
| HG02250 | 14,500,346 | 235,622 | 120,045 | 198,148 |
| HG02253 | 14,508,840 | 233,029 | 117,759 | 195,081 |
| HG02252 | 14,405,841 | 235,907 | 121,386 | 200,210 |
| HG02255 | 14,418,695 | 267,675 | 134,331 | 228,278 |
| HG02256 | 14,305,992 | 271,592 | 139,154 | 236,130 |
| HG02259 | 14,521,973 | 227,561 | 116,165 | 190,391 |
| HG01286 | 14,473,558 | 245,452 | 125,316 | 207,894 |
| HG03382 | 14,407,347 | 273,038 | 135,001 | 232,496 |
| HG01284 | 14,390,765 | 241,842 | 123,211 | 203,822 |
| HG03385 | 14,416,863 | 268,411 | 133,915 | 229,700 |
| HG01281 | 14,400,858 | 238,677 | 122,402 | 201,703 |
| HG01280 | 14,498,803 | 237,131 | 121,000 | 198,393 |
| NA19099 | 14,295,568 | 275,608 | 140,863 | 240,752 |
| HG01046 | 14,416,745 | 233,917 | 118,434 | 195,833 |
| HG01049 | 14,365,481 | 251,641 | 128,662 | 213,155 |
| HG01048 | 14,491,614 | 239,925 | 122,017 | 201,351 |
| NA19095 | 14,291,590 | 276,792 | 141,805 | 241,020 |
| NA19093 | 14,290,336 | 277,598 | 144,080 | 243,363 |
| NA19092 | 14,415,067 | 269,255 | 134,622 | 230,618 |
| NA19091 | 14,492,721 | 235,577 | 122,512 | 200,592 |
| NA19090 | 14,411,558 | 235,034 | 119,768 | 197,799 |
| NA20518 | 14,505,975 | 233,561 | 119,644 | 196,682 |
| NA19750 | 14,500,160 | 236,043 | 120,647 | 198,614 |
| HG03039 | 14,409,310 | 272,325 | 136,638 | 232,619 |
| NA12890 | 14,403,880 | 237,360 | 122,568 | 199,946 |
| NA19010 | 14,410,342 | 236,006 | 120,206 | 197,276 |
| HG03190 | 14,400,076 | 271,104 | 137,958 | 235,600 |
| HG02660 | 14,478,658 | 241,429 | 126,511 | 205,672 |

|         |            |         |         |         |
|---------|------------|---------|---------|---------|
| HG02661 | 14,386,576 | 243,942 | 126,566 | 205,419 |
| HG02666 | 14,387,361 | 277,028 | 141,957 | 239,086 |
| HG02667 | 14,299,345 | 274,080 | 141,491 | 238,097 |
| HG03729 | 14,490,718 | 240,650 | 123,100 | 200,929 |
| HG03727 | 14,491,828 | 240,073 | 122,932 | 200,726 |
| HG03722 | 14,395,437 | 240,606 | 124,581 | 202,349 |
| HG03720 | 14,481,934 | 239,977 | 124,167 | 204,984 |
| HG01869 | 14,406,865 | 236,738 | 120,838 | 199,044 |
| HG01868 | 14,410,076 | 235,558 | 119,790 | 198,058 |
| HG01867 | 14,509,535 | 233,364 | 118,815 | 195,662 |
| HG01866 | 14,489,121 | 237,464 | 122,712 | 202,273 |
| HG03629 | 14,492,978 | 240,032 | 122,607 | 201,289 |
| HG01864 | 14,505,770 | 234,420 | 118,958 | 196,377 |
| HG01863 | 14,411,006 | 235,160 | 120,068 | 197,971 |
| HG01862 | 14,410,002 | 236,413 | 119,367 | 197,472 |
| HG01861 | 14,507,886 | 233,236 | 118,353 | 195,478 |
| HG01860 | 14,509,778 | 232,753 | 117,588 | 195,251 |
| NA18924 | 14,290,755 | 278,025 | 142,660 | 241,182 |
| NA18923 | 14,412,613 | 269,965 | 135,760 | 231,027 |
| HG02715 | 14,388,522 | 276,621 | 141,288 | 239,128 |
| HG02716 | 14,281,704 | 280,806 | 145,955 | 245,148 |
| HG02181 | 14,411,370 | 235,458 | 119,492 | 197,946 |
| HG02180 | 14,411,168 | 236,158 | 119,634 | 197,594 |
| NA11881 | 14,508,891 | 232,567 | 118,739 | 195,810 |
| NA12045 | 14,511,296 | 233,716 | 117,907 | 194,350 |
| NA12044 | 14,406,528 | 237,250 | 121,462 | 198,598 |
| NA12046 | 14,407,010 | 236,844 | 121,322 | 199,256 |
| NA12043 | 14,497,894 | 235,386 | 120,815 | 199,152 |
| HG02185 | 14,412,569 | 235,637 | 119,896 | 196,765 |
| NA18613 | 14,510,029 | 233,120 | 118,186 | 194,436 |
| HG00244 | 14,504,839 | 234,810 | 119,188 | 196,215 |
| HG00245 | 14,412,244 | 235,546 | 118,687 | 197,468 |
| HG00246 | 14,507,785 | 233,830 | 118,735 | 194,900 |
| HG00240 | 14,403,990 | 237,598 | 122,739 | 200,806 |
| NA18610 | 14,409,025 | 236,416 | 120,290 | 197,737 |
| HG00242 | 14,508,112 | 233,786 | 119,230 | 195,409 |
| HG00243 | 14,486,311 | 237,911 | 124,246 | 203,129 |
| HG03824 | 14,495,303 | 238,865 | 120,455 | 198,990 |
| HG03826 | 14,394,703 | 240,714 | 123,921 | 203,376 |
| HG03821 | 14,498,130 | 237,642 | 119,939 | 198,929 |
| HG01708 | 14,509,430 | 233,580 | 118,551 | 194,722 |
| HG03823 | 14,398,733 | 239,270 | 122,651 | 202,710 |
| HG02808 | 14,292,340 | 276,420 | 143,569 | 240,894 |
| NA18595 | 14,410,222 | 236,598 | 119,789 | 197,744 |
| NA12275 | 14,371,108 | 235,197 | 120,785 | 235,934 |
| HG00657 | 14,408,643 | 236,686 | 120,542 | 197,708 |
| HG02804 | 14,409,551 | 271,728 | 136,643 | 232,441 |
| HG02805 | 14,295,517 | 275,511 | 143,358 | 240,170 |
| NA12273 | 14,403,674 | 237,750 | 122,001 | 200,359 |
| HG02223 | 14,413,346 | 234,461 | 120,110 | 197,739 |
| NA18591 | 14,410,959 | 235,436 | 119,818 | 197,254 |
| HG01917 | 14,497,265 | 235,367 | 120,982 | 198,626 |
| HG01444 | 14,400,244 | 239,293 | 121,669 | 201,883 |
| HG01447 | 14,388,762 | 244,028 | 124,224 | 205,771 |
| HG01914 | 14,421,433 | 266,539 | 134,340 | 226,966 |
| HG01441 | 14,402,892 | 238,334 | 121,714 | 200,028 |
| HG01912 | 14,397,802 | 272,608 | 138,782 | 236,913 |
| HG04156 | 14,399,288 | 239,854 | 122,493 | 201,741 |
| HG04158 | 14,479,121 | 241,473 | 125,242 | 205,266 |
| HG04159 | 14,400,971 | 239,013 | 122,284 | 201,742 |
| HG01918 | 14,413,060 | 235,015 | 120,541 | 195,909 |
| HG01241 | 14,401,904 | 270,794 | 139,539 | 234,357 |
| HG00525 | 14,410,002 | 235,529 | 120,940 | 197,871 |
| HG02938 | 14,412,923 | 269,903 | 135,812 | 231,840 |
| NA20853 | 14,403,053 | 238,426 | 121,123 | 201,230 |
| NA20852 | 14,505,254 | 234,358 | 119,669 | 197,320 |
| NA20851 | 14,402,645 | 238,563 | 121,383 | 200,176 |
| NA20850 | 14,487,919 | 238,544 | 123,128 | 202,534 |
| NA20856 | 14,405,095 | 237,106 | 121,192 | 199,682 |

|         |            |         |         |         |
|---------|------------|---------|---------|---------|
| NA20854 | 14,397,945 | 241,114 | 121,965 | 201,216 |
| NA20859 | 14,403,027 | 237,784 | 121,338 | 200,443 |
| NA20858 | 14,501,014 | 236,157 | 120,141 | 197,742 |
| HG00653 | 14,505,734 | 234,459 | 118,825 | 196,279 |
| HG00651 | 14,412,860 | 234,600 | 120,152 | 196,697 |
| HG01709 | 14,514,571 | 232,588 | 116,747 | 194,220 |
| NA12272 | 14,509,211 | 232,998 | 118,803 | 195,294 |
| HG00656 | 14,488,697 | 238,013 | 123,407 | 202,284 |
| HG00654 | 14,412,293 | 234,904 | 119,771 | 197,046 |
| HG01702 | 14,415,685 | 232,970 | 119,381 | 196,705 |
| HG01700 | 14,518,188 | 229,948 | 116,697 | 192,467 |
| HG01707 | 14,410,896 | 235,077 | 120,706 | 197,838 |
| HG01704 | 14,405,194 | 237,288 | 121,233 | 199,666 |
| HG01705 | 14,506,190 | 234,177 | 119,122 | 196,379 |
| HG00097 | 14,409,402 | 235,530 | 120,419 | 197,574 |
| HG00096 | 14,489,297 | 237,881 | 122,990 | 201,912 |
| HG00099 | 14,409,772 | 235,676 | 119,613 | 197,366 |
| HG03563 | 14,291,025 | 277,772 | 142,132 | 242,224 |
| HG04080 | 14,497,195 | 237,788 | 121,208 | 199,655 |
| HG02067 | 14,487,520 | 238,847 | 122,708 | 202,653 |
| HG02064 | 14,501,739 | 235,483 | 119,813 | 197,533 |
| HG02060 | 14,408,707 | 236,944 | 120,173 | 198,076 |
| HG02061 | 14,488,439 | 237,484 | 122,626 | 202,473 |
| HG00232 | 14,414,964 | 233,548 | 120,328 | 195,770 |
| HG02069 | 14,394,314 | 242,561 | 124,707 | 202,184 |
| HG01676 | 14,405,940 | 237,448 | 121,371 | 198,515 |
| HG01675 | 14,507,988 | 233,041 | 119,106 | 195,291 |
| HG01672 | 14,491,394 | 236,485 | 122,850 | 201,458 |
| HG01673 | 14,409,356 | 236,049 | 120,907 | 197,271 |
| HG01670 | 14,412,506 | 234,060 | 120,072 | 197,373 |
| NA21114 | 14,478,450 | 241,434 | 125,343 | 207,072 |
| HG01678 | 14,508,148 | 233,596 | 118,930 | 195,635 |
| HG01679 | 14,410,281 | 235,032 | 120,760 | 197,390 |
| NA19466 | 14,418,997 | 268,236 | 133,030 | 228,352 |
| NA19467 | 14,302,170 | 274,189 | 139,687 | 238,029 |
| NA19462 | 14,295,315 | 276,032 | 141,315 | 240,112 |
| NA19463 | 14,289,421 | 278,060 | 142,112 | 241,040 |
| NA19461 | 14,417,721 | 267,044 | 133,700 | 229,812 |
| NA19468 | 14,297,167 | 275,137 | 140,862 | 239,829 |
| HG03048 | 14,409,916 | 270,886 | 137,034 | 232,341 |
| NA12748 | 14,505,288 | 234,685 | 119,903 | 196,432 |
| HG02390 | 14,493,157 | 236,586 | 121,817 | 200,742 |
| HG02391 | 14,507,162 | 233,825 | 118,873 | 195,309 |
| HG02392 | 14,509,161 | 233,387 | 118,422 | 194,514 |
| NA19318 | 14,407,690 | 271,330 | 136,766 | 232,423 |
| HG02395 | 14,504,192 | 235,036 | 118,151 | 196,164 |
| NA19648 | 14,412,644 | 234,984 | 119,320 | 196,517 |
| NA19649 | 14,485,001 | 239,044 | 123,560 | 203,893 |
| NA19314 | 14,293,756 | 275,564 | 141,381 | 240,041 |
| HG02399 | 14,487,293 | 237,964 | 123,144 | 202,158 |
| NA19316 | 14,289,038 | 278,047 | 142,555 | 240,910 |
| NA19317 | 14,397,225 | 272,471 | 139,400 | 236,842 |
| NA19310 | 14,297,217 | 276,108 | 140,066 | 239,369 |
| NA19312 | 14,419,588 | 267,560 | 133,413 | 228,741 |
| NA21094 | 14,500,545 | 236,369 | 120,123 | 197,984 |
| NA21095 | 14,502,625 | 235,669 | 120,054 | 198,108 |
| NA21097 | 14,400,187 | 239,307 | 122,355 | 200,730 |
| NA21090 | 14,495,101 | 238,314 | 120,982 | 199,631 |
| NA21091 | 14,505,759 | 234,598 | 119,332 | 197,063 |
| NA21092 | 14,496,153 | 238,172 | 121,467 | 199,303 |
| NA21093 | 14,498,744 | 236,830 | 120,086 | 198,138 |
| NA21098 | 14,498,214 | 238,289 | 120,945 | 198,384 |
| NA21099 | 14,502,863 | 236,793 | 119,671 | 197,603 |
| NA19792 | 14,486,157 | 242,479 | 123,792 | 202,934 |
| NA19794 | 14,399,771 | 239,666 | 122,462 | 201,703 |
| NA19795 | 14,494,488 | 238,742 | 120,798 | 200,464 |
| NA19904 | 14,401,882 | 270,976 | 138,238 | 233,621 |
| HG00479 | 14,409,125 | 236,153 | 120,019 | 197,774 |
| HG00478 | 14,489,762 | 237,595 | 122,248 | 201,806 |



|         |            |         |         |         |
|---------|------------|---------|---------|---------|
| HG00473 | 14,405,589 | 237,639 | 120,822 | 198,993 |
| HG00472 | 14,509,445 | 233,269 | 117,560 | 195,193 |
| HG00476 | 14,410,446 | 236,129 | 119,367 | 198,129 |
| HG00475 | 14,506,946 | 233,973 | 118,368 | 195,872 |
| HG02489 | 14,393,797 | 274,486 | 139,704 | 236,556 |
| HG02484 | 14,415,581 | 268,250 | 134,112 | 229,321 |
| HG02485 | 14,307,666 | 270,968 | 139,517 | 235,058 |
| HG02481 | 14,412,117 | 269,838 | 135,600 | 231,332 |
| NA19088 | 14,504,630 | 234,550 | 119,497 | 195,387 |
| NA19089 | 14,508,150 | 234,217 | 118,778 | 195,104 |
| HG01058 | 14,390,963 | 242,938 | 123,932 | 204,123 |
| HG00500 | 14,510,285 | 232,958 | 117,929 | 194,538 |
| NA19084 | 14,411,156 | 236,152 | 119,722 | 197,034 |
| NA19085 | 14,504,158 | 235,752 | 118,471 | 196,685 |
| HG01054 | 14,489,564 | 240,061 | 122,406 | 201,445 |
| NA19087 | 14,410,938 | 235,356 | 120,292 | 197,995 |
| HG01052 | 14,352,869 | 254,987 | 131,813 | 217,331 |
| NA19081 | 14,415,773 | 234,533 | 118,553 | 195,557 |
| NA19082 | 14,487,391 | 238,534 | 123,680 | 202,167 |
| NA19083 | 14,506,618 | 233,630 | 118,711 | 196,625 |
| NA19144 | 14,395,054 | 274,237 | 138,650 | 237,352 |
| NA19147 | 14,297,892 | 274,179 | 140,444 | 239,942 |
| HG02142 | 14,400,106 | 239,990 | 122,882 | 200,862 |
| HG03280 | 14,411,272 | 269,581 | 134,688 | 231,941 |
| HG02380 | 14,514,557 | 231,944 | 116,763 | 192,328 |
| HG03815 | 14,497,754 | 236,904 | 121,425 | 200,147 |
| HG03899 | 14,501,263 | 236,012 | 119,852 | 197,770 |
| HG02658 | 14,423,139 | 232,377 | 118,556 | 193,063 |
| HG02655 | 14,402,414 | 237,670 | 123,005 | 201,035 |
| HG02654 | 14,490,297 | 240,165 | 122,912 | 200,659 |
| HG02657 | 14,488,519 | 240,368 | 123,894 | 202,064 |
| HG02651 | 14,495,742 | 238,498 | 121,635 | 199,337 |
| HG02652 | 14,397,185 | 240,310 | 123,298 | 202,931 |
| HG03753 | 14,494,936 | 238,113 | 120,430 | 200,340 |
| HG03752 | 14,406,648 | 236,906 | 121,357 | 199,272 |
| HG03750 | 14,476,586 | 242,572 | 126,223 | 206,052 |
| HG03757 | 14,388,182 | 242,984 | 125,967 | 205,305 |
| HG03756 | 14,391,559 | 241,541 | 125,936 | 204,277 |
| HG03755 | 14,494,470 | 239,246 | 120,823 | 199,704 |
| HG03754 | 14,386,518 | 244,294 | 126,261 | 204,707 |
| NA12872 | 14,505,752 | 234,437 | 119,073 | 195,892 |
| HG01248 | 14,385,151 | 244,619 | 125,157 | 206,602 |
| NA12874 | 14,496,315 | 234,968 | 121,404 | 199,188 |
| NA12878 | 14,408,871 | 235,801 | 120,305 | 198,289 |
| HG03585 | 14,477,922 | 241,943 | 125,111 | 206,419 |
| HG03631 | 14,390,115 | 241,887 | 125,974 | 205,787 |
| HG03634 | 14,396,317 | 241,499 | 122,853 | 202,674 |
| HG01498 | 14,396,130 | 241,171 | 123,301 | 201,808 |
| HG03636 | 14,499,550 | 237,009 | 120,365 | 198,602 |
| HG01874 | 14,395,706 | 242,051 | 123,661 | 201,303 |
| HG01870 | 14,398,732 | 240,398 | 123,221 | 199,734 |
| HG01871 | 14,395,702 | 241,857 | 123,902 | 201,517 |
| HG01872 | 14,495,615 | 239,139 | 122,037 | 198,991 |
| HG01873 | 14,492,101 | 240,122 | 122,777 | 199,375 |
| HG02728 | 14,387,737 | 244,299 | 125,716 | 204,775 |
| NA18912 | 14,286,924 | 279,436 | 143,335 | 241,765 |
| NA18915 | 14,390,221 | 275,556 | 141,177 | 239,135 |
| NA18917 | 14,416,170 | 269,030 | 134,633 | 230,553 |
| NA18916 | 14,289,072 | 278,006 | 142,097 | 241,944 |
| HG02721 | 14,410,148 | 271,094 | 136,957 | 232,073 |
| HG02722 | 14,280,807 | 280,821 | 145,969 | 244,239 |
| HG02725 | 14,385,088 | 244,744 | 126,932 | 205,198 |
| HG02724 | 14,489,134 | 239,338 | 123,726 | 202,660 |
| HG02727 | 14,494,007 | 239,720 | 122,001 | 200,086 |
| NA18615 | 14,411,214 | 235,778 | 119,768 | 197,502 |
| NA07357 | 14,510,984 | 232,089 | 118,355 | 195,335 |
| NA12058 | 14,405,940 | 237,399 | 121,512 | 198,313 |
| HG00271 | 14,486,076 | 238,951 | 123,600 | 203,705 |
| HG03838 | 14,392,064 | 242,158 | 125,070 | 203,746 |

|         |            |         |         |         |
|---------|------------|---------|---------|---------|
| HG02836 | 14,419,078 | 268,021 | 134,304 | 229,203 |
| HG00275 | 14,411,984 | 234,660 | 120,373 | 197,264 |
| HG00274 | 14,411,491 | 234,936 | 120,517 | 196,927 |
| HG00277 | 14,505,880 | 233,243 | 120,226 | 196,054 |
| HG00276 | 14,409,846 | 235,642 | 120,915 | 197,487 |
| HG03832 | 14,396,405 | 240,468 | 123,024 | 202,785 |
| HG00278 | 14,513,382 | 231,666 | 117,396 | 193,533 |
| HG03830 | 14,497,889 | 237,508 | 120,136 | 199,753 |
| NA12828 | 14,410,602 | 235,408 | 120,991 | 198,403 |
| HG02839 | 14,418,853 | 267,707 | 133,634 | 230,212 |
| HG03521 | 14,413,343 | 270,220 | 135,863 | 230,772 |
| HG04219 | 14,479,026 | 241,104 | 124,303 | 205,216 |
| HG01456 | 14,389,536 | 243,657 | 123,876 | 204,504 |
| HG01455 | 14,496,036 | 238,414 | 121,668 | 199,767 |
| HG04164 | 14,472,243 | 243,612 | 126,590 | 206,939 |
| HG01459 | 14,396,671 | 241,327 | 122,644 | 202,018 |
| HG04161 | 14,476,389 | 242,057 | 125,997 | 206,954 |
| HG04162 | 14,394,210 | 241,714 | 123,565 | 203,847 |
| NA18611 | 14,509,006 | 233,618 | 117,870 | 195,626 |
| NA20845 | 14,493,856 | 238,537 | 121,218 | 200,969 |
| NA20846 | 14,506,614 | 234,108 | 119,010 | 196,353 |
| NA20847 | 14,402,685 | 238,171 | 121,658 | 200,840 |
| NA20849 | 14,398,193 | 240,212 | 121,954 | 201,376 |
| HG00640 | 14,475,772 | 242,515 | 126,848 | 206,795 |
| HG00641 | 14,397,248 | 240,569 | 122,114 | 201,768 |
| HG02394 | 14,508,108 | 233,610 | 118,040 | 196,007 |
| NA19319 | 14,409,250 | 271,251 | 136,988 | 232,482 |
| HG02396 | 14,508,800 | 233,491 | 118,246 | 195,188 |
| HG02798 | 14,388,044 | 276,670 | 141,539 | 238,911 |
| HG02398 | 14,508,800 | 232,795 | 118,114 | 195,650 |
| HG00250 | 14,408,148 | 235,931 | 121,452 | 197,916 |
| NA19315 | 14,294,013 | 276,342 | 140,868 | 240,316 |
| HG02783 | 14,486,256 | 241,955 | 124,215 | 202,073 |
| HG02013 | 14,412,077 | 269,852 | 135,398 | 230,617 |
| HG02012 | 14,296,914 | 275,275 | 140,789 | 239,542 |
| HG02010 | 14,295,214 | 276,165 | 141,834 | 239,479 |
| HG02017 | 14,487,096 | 237,742 | 123,491 | 201,969 |
| HG02016 | 14,409,998 | 236,213 | 119,799 | 198,426 |
| HG02014 | 14,407,940 | 272,680 | 138,021 | 231,360 |
| HG02019 | 14,412,212 | 235,061 | 119,455 | 198,033 |
| HG01603 | 14,506,582 | 234,500 | 120,090 | 196,651 |
| HG01602 | 14,408,270 | 237,106 | 120,579 | 198,014 |
| HG01600 | 14,405,838 | 237,640 | 120,981 | 199,097 |
| HG01607 | 14,410,290 | 235,404 | 121,401 | 197,410 |
| HG01606 | 14,507,128 | 233,985 | 118,835 | 195,854 |
| HG01605 | 14,406,190 | 237,020 | 121,104 | 198,217 |
| HG01608 | 14,485,172 | 239,226 | 123,295 | 203,061 |
| HG04186 | 14,398,937 | 239,242 | 122,737 | 201,654 |
| HG04185 | 14,496,286 | 238,621 | 120,263 | 199,286 |
| HG04183 | 14,401,602 | 239,134 | 122,055 | 201,141 |
| HG04182 | 14,498,062 | 237,306 | 120,934 | 198,940 |
| HG04180 | 14,382,635 | 244,617 | 127,589 | 206,809 |
| HG04189 | 14,394,483 | 241,252 | 123,175 | 203,285 |
| HG04188 | 14,475,857 | 242,926 | 125,065 | 206,832 |
| NA19328 | 14,292,811 | 277,017 | 141,728 | 240,648 |
| NA19321 | 14,291,060 | 277,763 | 142,266 | 241,978 |
| NA19320 | 14,293,179 | 277,338 | 140,613 | 240,970 |
| NA19323 | 14,291,860 | 276,741 | 142,920 | 240,976 |
| NA19324 | 14,293,792 | 275,452 | 142,729 | 241,073 |
| NA19327 | 14,288,281 | 278,267 | 143,818 | 241,856 |
| HG02128 | 14,501,394 | 236,469 | 119,957 | 197,673 |
| HG02127 | 14,404,516 | 238,480 | 122,152 | 199,426 |
| HG02122 | 14,500,841 | 236,523 | 120,664 | 197,669 |
| HG02121 | 14,401,867 | 239,259 | 122,329 | 200,647 |
| NA07037 | 14,402,788 | 238,562 | 122,782 | 199,884 |
| HG01119 | 14,400,800 | 238,149 | 122,140 | 200,949 |
| HG01113 | 14,403,478 | 238,821 | 121,548 | 199,564 |
| HG01112 | 14,452,276 | 238,123 | 122,428 | 239,619 |
| HG01111 | 14,382,409 | 244,738 | 126,062 | 208,361 |

|         |            |         |         |         |
|---------|------------|---------|---------|---------|
| HG01110 | 14,490,568 | 240,542 | 121,706 | 201,568 |
| NA19257 | 14,296,077 | 276,130 | 140,181 | 238,990 |
| HG00463 | 14,504,580 | 234,569 | 119,051 | 196,498 |
| HG00464 | 14,410,586 | 235,763 | 120,344 | 197,977 |
| NA19747 | 14,497,863 | 238,122 | 120,862 | 198,713 |
| NA19746 | 14,383,605 | 243,298 | 126,898 | 206,151 |
| NA19741 | 14,513,478 | 231,209 | 117,282 | 193,521 |
| NA19740 | 14,402,307 | 237,574 | 121,933 | 200,782 |
| NA19749 | 14,397,819 | 240,162 | 122,922 | 201,309 |
| HG02239 | 14,401,308 | 237,833 | 122,362 | 201,118 |
| HG02238 | 14,509,539 | 232,917 | 117,714 | 194,735 |
| HG02233 | 14,502,544 | 235,576 | 119,303 | 197,255 |
| HG02232 | 14,406,355 | 236,792 | 120,729 | 198,362 |
| HG02231 | 14,508,623 | 233,073 | 118,147 | 195,084 |
| HG02230 | 14,408,317 | 235,940 | 121,265 | 198,910 |
| HG02236 | 14,510,398 | 232,792 | 118,413 | 194,695 |
| HG02235 | 14,409,892 | 235,585 | 120,723 | 198,461 |
| HG01029 | 14,415,516 | 234,379 | 119,511 | 196,771 |
| HG01028 | 14,505,031 | 234,304 | 119,066 | 195,785 |
| HG00513 | 14,409,753 | 235,510 | 120,626 | 196,848 |
| HG01491 | 14,494,345 | 235,314 | 122,017 | 199,937 |
| HG02345 | 14,386,719 | 244,281 | 124,469 | 204,862 |
| HG02343 | 14,402,515 | 270,616 | 138,495 | 234,013 |
| HG03298 | 14,410,580 | 270,790 | 135,151 | 231,479 |
| HG03297 | 14,293,157 | 277,081 | 140,816 | 240,450 |
| HG03294 | 14,298,422 | 275,284 | 139,940 | 238,549 |
| HG03295 | 14,413,903 | 268,242 | 135,734 | 231,387 |
| HG02348 | 14,420,464 | 231,955 | 118,332 | 194,188 |
| HG01334 | 14,491,312 | 237,464 | 122,075 | 200,822 |
| NA12400 | 14,411,954 | 234,543 | 120,410 | 196,996 |
| HG02648 | 14,507,490 | 233,667 | 118,768 | 195,565 |
| HG02649 | 14,409,700 | 235,812 | 120,609 | 197,596 |
| HG02642 | 14,411,870 | 270,870 | 136,389 | 231,923 |
| HG02643 | 14,284,859 | 279,871 | 144,977 | 244,251 |
| HG02646 | 14,282,883 | 280,243 | 145,022 | 244,225 |
| HG02645 | 14,406,626 | 272,391 | 137,688 | 232,430 |
| HG03740 | 14,482,652 | 240,088 | 125,321 | 203,525 |
| HG03741 | 14,393,276 | 242,045 | 124,181 | 202,333 |
| HG03742 | 14,501,125 | 236,186 | 119,823 | 198,131 |
| HG03743 | 14,495,689 | 238,511 | 121,577 | 199,104 |
| HG03744 | 14,480,331 | 241,293 | 124,737 | 205,854 |
| HG03745 | 14,502,721 | 235,402 | 119,720 | 197,511 |
| HG03746 | 14,491,228 | 240,977 | 122,590 | 200,770 |
| HG00881 | 14,487,252 | 238,635 | 122,605 | 202,463 |
| NA12843 | 14,406,241 | 237,885 | 121,709 | 198,753 |
| NA12842 | 14,508,320 | 233,521 | 119,206 | 195,617 |
| NA18528 | 14,403,370 | 238,900 | 122,400 | 199,657 |
| HG02736 | 14,495,556 | 237,327 | 121,344 | 199,923 |
| HG02737 | 14,396,158 | 240,297 | 123,440 | 203,018 |
| HG02734 | 14,412,739 | 234,497 | 121,204 | 197,763 |
| HG00867 | 14,408,163 | 237,223 | 120,509 | 198,969 |
| HG02733 | 14,491,394 | 240,809 | 123,294 | 201,016 |
| HG02731 | 14,397,683 | 241,744 | 122,129 | 202,001 |
| HG01841 | 14,409,914 | 235,633 | 119,908 | 197,462 |
| HG01840 | 14,484,361 | 240,361 | 124,209 | 203,451 |
| HG03607 | 14,396,132 | 240,867 | 122,766 | 202,786 |
| HG01842 | 14,488,866 | 238,539 | 122,103 | 201,606 |
| HG01845 | 14,403,112 | 237,953 | 121,459 | 199,819 |
| HG01844 | 14,504,904 | 235,543 | 118,691 | 195,686 |
| HG03603 | 14,497,518 | 236,959 | 120,747 | 199,871 |
| HG01846 | 14,486,031 | 239,458 | 123,472 | 202,912 |
| NA18908 | 14,416,935 | 268,347 | 134,508 | 230,119 |
| NA18909 | 14,294,148 | 276,883 | 141,380 | 240,597 |
| NA18907 | 14,290,366 | 278,176 | 142,048 | 242,311 |
| HG01593 | 14,408,571 | 235,114 | 120,851 | 197,647 |
| HG01597 | 14,408,928 | 237,164 | 120,114 | 197,933 |
| HG01596 | 14,489,476 | 236,542 | 123,222 | 201,296 |
| HG01595 | 14,410,952 | 235,380 | 120,227 | 197,612 |
| HG01599 | 14,407,311 | 237,681 | 120,254 | 198,504 |

|         |            |         |         |         |
|---------|------------|---------|---------|---------|
| NA07347 | 14,499,265 | 236,122 | 121,116 | 198,193 |
| HG02586 | 14,285,032 | 279,006 | 145,192 | 243,432 |
| HG03518 | 14,406,004 | 271,897 | 135,995 | 232,692 |
| HG02820 | 14,298,987 | 274,145 | 140,098 | 240,313 |
| HG04214 | 14,396,189 | 241,186 | 123,075 | 201,848 |
| HG04212 | 14,402,210 | 238,129 | 121,601 | 200,133 |
| HG04211 | 14,517,578 | 230,080 | 116,801 | 191,638 |
| HG04210 | 14,492,950 | 239,658 | 120,775 | 199,672 |
| HG00266 | 14,407,111 | 236,131 | 122,617 | 199,329 |
| HG00267 | 14,509,546 | 232,802 | 119,396 | 195,698 |
| HG00264 | 14,524,557 | 229,530 | 115,036 | 189,918 |
| HG00265 | 14,506,227 | 233,996 | 119,812 | 195,962 |
| HG03515 | 14,411,047 | 269,811 | 134,490 | 231,742 |
| HG03514 | 14,293,542 | 276,542 | 141,696 | 240,256 |
| HG00260 | 14,508,755 | 232,814 | 118,343 | 194,557 |
| HG00261 | 14,412,795 | 234,277 | 119,550 | 197,738 |
| NA20754 | 14,505,683 | 234,511 | 119,130 | 196,101 |
| NA19819 | 14,308,714 | 270,729 | 138,696 | 234,987 |
| NA20755 | 14,508,519 | 233,175 | 118,684 | 195,519 |
| HG02589 | 14,285,762 | 279,986 | 144,777 | 242,395 |
| NA19818 | 14,431,220 | 262,838 | 132,131 | 224,359 |
| NA18976 | 14,398,577 | 240,387 | 123,595 | 201,282 |
| HG01933 | 14,391,593 | 242,806 | 124,017 | 203,500 |
| HG01932 | 14,513,826 | 230,980 | 118,014 | 193,398 |
| HG01935 | 14,515,340 | 230,490 | 117,083 | 193,028 |
| HG01936 | 14,409,081 | 235,639 | 120,960 | 199,054 |
| HG01939 | 14,410,264 | 235,783 | 119,926 | 197,463 |
| HG01938 | 14,523,102 | 226,939 | 116,025 | 190,973 |
| HG04171 | 14,390,867 | 242,708 | 123,796 | 204,349 |
| HG04176 | 14,485,982 | 241,222 | 122,494 | 202,854 |
| HG04177 | 14,397,022 | 240,152 | 122,200 | 202,859 |
| HG00982 | 14,487,593 | 238,115 | 122,838 | 202,519 |
| HG03995 | 14,398,423 | 240,102 | 122,549 | 201,667 |
| HG03991 | 14,500,481 | 236,897 | 119,991 | 197,809 |
| HG03990 | 14,485,472 | 239,133 | 124,005 | 203,461 |
| HG03999 | 14,478,543 | 241,487 | 124,739 | 206,571 |
| HG03998 | 14,497,219 | 238,110 | 120,338 | 199,214 |
| NA20878 | 14,404,229 | 237,640 | 120,785 | 199,165 |
| NA20875 | 14,401,126 | 238,476 | 122,702 | 200,947 |
| NA20874 | 14,398,869 | 240,035 | 122,221 | 202,562 |
| NA20877 | 14,403,157 | 238,688 | 121,699 | 200,573 |
| NA20876 | 14,400,278 | 238,998 | 122,031 | 201,782 |
| NA20870 | 14,503,155 | 235,636 | 119,319 | 197,393 |
| NA20872 | 14,406,421 | 237,256 | 121,514 | 199,931 |
| HG00675 | 14,400,201 | 239,548 | 123,129 | 200,918 |
| HG00674 | 14,501,605 | 235,719 | 120,041 | 198,591 |
| HG00671 | 14,504,952 | 234,851 | 118,941 | 196,206 |
| HG00672 | 14,412,040 | 235,403 | 119,810 | 196,845 |
| NA20783 | 14,509,883 | 234,036 | 117,662 | 194,313 |
| NA20787 | 14,490,033 | 237,927 | 122,522 | 202,210 |
| NA20786 | 14,408,980 | 236,246 | 120,522 | 198,207 |
| NA20785 | 14,506,637 | 233,765 | 119,056 | 196,496 |
| NA20276 | 14,303,035 | 272,883 | 140,360 | 238,197 |
| NA20274 | 14,336,516 | 259,903 | 134,944 | 224,684 |
| NA20278 | 14,438,130 | 260,916 | 131,382 | 221,772 |
| HG02002 | 14,513,119 | 231,183 | 117,726 | 193,822 |
| HG02003 | 14,416,071 | 233,539 | 118,664 | 195,473 |
| HG02006 | 14,327,252 | 264,706 | 136,320 | 226,428 |
| HG02008 | 14,506,058 | 234,506 | 119,639 | 195,163 |
| HG02009 | 14,392,629 | 274,395 | 139,929 | 238,306 |
| HG01610 | 14,510,030 | 232,893 | 118,603 | 194,703 |
| NA18951 | 14,408,792 | 236,176 | 120,500 | 198,365 |
| HG01612 | 14,405,693 | 237,433 | 121,306 | 199,052 |
| HG01613 | 14,406,439 | 237,251 | 121,076 | 198,413 |
| HG01615 | 14,507,473 | 233,339 | 118,934 | 195,521 |
| HG01617 | 14,490,041 | 237,062 | 122,735 | 201,778 |
| HG01618 | 14,412,280 | 235,057 | 119,362 | 197,022 |
| HG01619 | 14,503,329 | 234,603 | 120,144 | 196,630 |
| NA19098 | 14,396,034 | 273,295 | 138,989 | 236,895 |

|         |            |         |         |         |
|---------|------------|---------|---------|---------|
| NA19401 | 14,291,190 | 277,029 | 142,462 | 241,400 |
| NA19403 | 14,298,682 | 274,348 | 140,691 | 238,832 |
| NA19404 | 14,293,875 | 276,029 | 141,721 | 240,881 |
| HG01055 | 14,388,562 | 244,480 | 123,785 | 205,543 |
| HG04194 | 14,494,335 | 239,092 | 121,383 | 200,204 |
| HG04195 | 14,400,727 | 238,792 | 121,333 | 202,460 |
| HG00189 | 14,508,298 | 233,779 | 119,328 | 195,860 |
| HG00188 | 14,490,545 | 237,825 | 122,655 | 201,600 |
| HG00183 | 14,486,855 | 238,230 | 123,766 | 202,826 |
| HG00182 | 14,507,717 | 233,921 | 118,710 | 195,684 |
| HG00181 | 14,504,403 | 235,195 | 119,951 | 197,047 |
| HG00180 | 14,410,663 | 235,540 | 121,213 | 198,204 |
| HG04198 | 14,475,269 | 242,720 | 125,644 | 206,609 |
| HG00186 | 14,489,945 | 237,286 | 123,045 | 201,371 |
| HG00185 | 14,504,401 | 235,016 | 119,575 | 196,866 |
| NA18639 | 14,514,922 | 231,095 | 116,952 | 193,469 |
| HG01191 | 14,389,930 | 242,268 | 124,436 | 204,613 |
| HG01190 | 14,483,672 | 243,794 | 122,403 | 204,071 |
| NA19625 | 14,311,999 | 270,461 | 138,531 | 233,120 |
| HG02138 | 14,489,376 | 237,764 | 122,545 | 201,469 |
| HG02139 | 14,412,043 | 234,929 | 119,527 | 197,048 |
| HG02134 | 14,487,760 | 238,683 | 122,761 | 202,048 |
| HG02136 | 14,410,683 | 234,978 | 120,678 | 197,790 |
| HG02137 | 14,503,336 | 234,407 | 119,318 | 198,018 |
| HG02130 | 14,411,000 | 235,896 | 119,196 | 198,309 |
| NA19086 | 14,511,502 | 233,055 | 118,080 | 193,933 |
| HG02133 | 14,407,531 | 236,318 | 119,964 | 198,856 |
| NA20897 | 14,487,140 | 239,134 | 123,787 | 202,570 |
| NA20896 | 14,403,826 | 238,265 | 120,557 | 200,515 |
| HG00457 | 14,488,091 | 237,964 | 122,134 | 202,336 |
| NA20894 | 14,399,430 | 239,127 | 122,607 | 201,597 |
| HG01108 | 14,316,152 | 267,752 | 137,695 | 231,687 |
| NA20892 | 14,400,250 | 239,782 | 121,997 | 200,885 |
| NA20891 | 14,501,868 | 236,059 | 119,840 | 197,551 |
| HG00452 | 14,409,587 | 236,253 | 119,882 | 198,131 |
| HG01104 | 14,491,239 | 239,584 | 121,756 | 201,431 |
| HG01105 | 14,392,521 | 241,025 | 123,924 | 204,903 |
| HG01107 | 14,456,618 | 250,945 | 127,791 | 213,156 |
| HG00458 | 14,412,484 | 234,777 | 119,625 | 196,743 |
| NA20899 | 14,401,934 | 239,192 | 120,827 | 200,839 |
| NA19728 | 14,421,187 | 231,104 | 119,728 | 193,585 |
| NA19248 | 14,394,993 | 273,789 | 139,267 | 236,425 |
| HG00351 | 14,493,650 | 236,157 | 122,485 | 201,067 |
| HG00693 | 14,409,581 | 236,741 | 120,425 | 197,884 |
| HG00692 | 14,507,326 | 234,048 | 118,747 | 195,188 |
| HG00690 | 14,412,097 | 235,742 | 119,724 | 196,562 |
| HG00356 | 14,411,598 | 235,806 | 120,163 | 197,422 |
| HG01198 | 14,383,947 | 244,373 | 124,996 | 207,052 |
| NA19247 | 14,302,952 | 272,585 | 139,749 | 237,409 |
| HG00699 | 14,410,788 | 235,444 | 120,730 | 197,268 |
| HG00698 | 14,488,939 | 237,345 | 122,668 | 201,104 |
| NA19755 | 14,396,433 | 240,021 | 123,219 | 202,378 |
| NA19756 | 14,496,753 | 238,860 | 120,125 | 199,839 |
| HG03199 | 14,420,125 | 267,175 | 134,211 | 228,463 |
| HG03198 | 14,295,444 | 275,541 | 141,315 | 239,762 |
| NA19752 | 14,407,846 | 236,006 | 121,386 | 199,336 |
| HG03195 | 14,296,084 | 275,213 | 140,788 | 240,619 |
| HG03196 | 14,417,726 | 268,540 | 133,142 | 229,567 |
| NA19758 | 14,402,602 | 237,733 | 122,792 | 198,941 |
| NA19759 | 14,501,896 | 235,631 | 120,053 | 196,483 |
| HG03193 | 14,414,413 | 269,841 | 134,692 | 230,386 |
| HG03354 | 14,293,058 | 276,622 | 141,155 | 240,953 |
| HG03352 | 14,415,891 | 268,796 | 134,220 | 230,043 |
| HG03351 | 14,294,717 | 276,662 | 141,152 | 239,477 |
| HG01051 | 14,477,640 | 244,995 | 123,931 | 206,672 |
| NA18599 | 14,405,403 | 237,171 | 121,158 | 200,113 |
| HG02220 | 14,413,125 | 235,119 | 119,094 | 197,321 |
| HG02221 | 14,513,689 | 231,272 | 117,607 | 193,052 |
| NA18597 | 14,403,828 | 238,145 | 121,324 | 198,802 |

|         |            |         |         |         |
|---------|------------|---------|---------|---------|
| NA18596 | 14,375,520 | 234,227 | 120,453 | 235,272 |
| HG02224 | 14,494,827 | 235,403 | 122,001 | 199,677 |
| NA18593 | 14,410,529 | 236,041 | 120,229 | 197,838 |
| NA18592 | 14,411,680 | 235,569 | 119,740 | 196,531 |
| NA19334 | 14,410,644 | 270,002 | 136,453 | 231,886 |
| NA19332 | 14,329,865 | 268,061 | 133,297 | 229,431 |
| HG00524 | 14,509,819 | 233,458 | 117,439 | 194,920 |
| NA19331 | 14,409,305 | 271,581 | 136,367 | 232,235 |
| NA18757 | 14,490,711 | 237,057 | 122,492 | 201,884 |
| HG01031 | 14,506,410 | 233,884 | 118,752 | 196,169 |
| NA19338 | 14,296,094 | 276,845 | 141,113 | 239,009 |
| NA18577 | 14,404,110 | 238,164 | 121,975 | 200,044 |
| NA18574 | 14,408,914 | 235,693 | 120,148 | 198,390 |
| NA18573 | 14,407,904 | 237,378 | 120,421 | 197,991 |
| NA18572 | 14,511,013 | 233,094 | 118,319 | 194,373 |
| NA18571 | 14,409,445 | 236,312 | 120,395 | 197,762 |
| NA18570 | 14,406,805 | 236,969 | 120,453 | 198,136 |
| NA18579 | 14,407,126 | 236,845 | 120,333 | 198,666 |
| HG02087 | 14,409,650 | 234,996 | 119,961 | 198,857 |
| HG02355 | 14,508,793 | 232,873 | 118,406 | 195,361 |
| HG02356 | 14,507,076 | 234,391 | 118,010 | 195,467 |
| HG02351 | 14,506,066 | 234,247 | 118,702 | 196,078 |
| HG02353 | 14,482,848 | 239,995 | 124,180 | 204,457 |
| HG01325 | 14,471,583 | 244,547 | 126,253 | 208,729 |
| HG01326 | 14,390,128 | 241,178 | 124,638 | 204,668 |
| HG01323 | 14,379,769 | 245,214 | 126,221 | 208,833 |
| HG03911 | 14,478,344 | 242,112 | 124,873 | 205,557 |
| HG03775 | 14,494,428 | 239,527 | 121,918 | 200,336 |
| HG03774 | 14,399,407 | 239,475 | 122,005 | 201,457 |
| HG03777 | 14,484,026 | 240,277 | 123,034 | 203,628 |
| HG03771 | 14,488,005 | 241,220 | 123,681 | 202,222 |
| HG03770 | 14,391,074 | 242,779 | 125,054 | 203,900 |
| HG03773 | 14,498,211 | 237,801 | 120,959 | 197,272 |
| HG03772 | 14,393,491 | 241,844 | 124,874 | 202,130 |
| HG03660 | 14,495,850 | 238,355 | 121,896 | 200,197 |
| HG03779 | 14,477,726 | 242,895 | 125,373 | 205,856 |
| HG03778 | 14,495,978 | 237,762 | 121,712 | 199,746 |
| HG03175 | 14,410,364 | 271,316 | 135,066 | 232,006 |
| HG03172 | 14,397,055 | 272,736 | 138,107 | 236,190 |
| HG01857 | 14,401,596 | 239,420 | 121,966 | 200,140 |
| HG01855 | 14,405,982 | 237,471 | 121,586 | 199,078 |
| HG01852 | 14,505,051 | 235,277 | 118,060 | 195,772 |
| HG01853 | 14,405,470 | 237,956 | 121,102 | 199,225 |
| HG01850 | 14,405,386 | 237,711 | 120,819 | 198,944 |
| HG01851 | 14,407,249 | 237,180 | 120,853 | 198,216 |
| HG01858 | 14,405,417 | 237,974 | 120,861 | 198,851 |
| HG01859 | 14,405,651 | 236,683 | 121,473 | 198,706 |
| HG00851 | 14,411,156 | 236,211 | 119,276 | 197,004 |
| HG03619 | 14,400,921 | 239,395 | 122,339 | 200,587 |
| HG03611 | 14,394,670 | 242,034 | 122,976 | 203,443 |
| HG03616 | 14,382,039 | 246,765 | 127,314 | 206,210 |
| HG03615 | 14,494,262 | 239,141 | 121,751 | 200,365 |
| HG02585 | 14,410,888 | 271,058 | 136,006 | 231,383 |
| NA18979 | 14,409,903 | 236,171 | 119,455 | 198,824 |
| NA18978 | 14,402,335 | 238,789 | 122,579 | 200,332 |
| HG02580 | 14,303,785 | 273,600 | 139,278 | 236,340 |
| HG02583 | 14,289,440 | 278,384 | 143,665 | 242,826 |
| HG02582 | 14,390,940 | 274,795 | 141,853 | 239,005 |
| NA18973 | 14,411,119 | 236,158 | 119,993 | 197,408 |
| NA18972 | 14,413,811 | 234,997 | 119,285 | 195,971 |
| NA18971 | 14,500,067 | 236,936 | 120,509 | 197,914 |
| NA18970 | 14,502,230 | 236,046 | 119,997 | 196,715 |
| NA18977 | 14,496,550 | 236,554 | 121,012 | 198,666 |
| HG02588 | 14,391,255 | 274,979 | 141,138 | 238,596 |
| NA18975 | 14,398,385 | 239,857 | 124,190 | 201,428 |
| NA18974 | 14,498,608 | 236,916 | 121,795 | 197,918 |
| NA19923 | 14,289,217 | 264,832 | 135,145 | 266,764 |
| HG03121 | 14,284,045 | 280,214 | 144,755 | 243,630 |
| NA20901 | 14,492,741 | 238,546 | 121,401 | 201,259 |

|         |            |         |         |         |
|---------|------------|---------|---------|---------|
| HG02049 | 14,393,369 | 241,812 | 124,599 | 202,580 |
| HG01583 | 14,477,710 | 242,278 | 124,933 | 205,885 |
| HG01586 | 14,479,832 | 241,587 | 124,339 | 204,513 |
| HG01589 | 14,503,078 | 234,592 | 120,053 | 196,514 |
| HG04206 | 14,496,513 | 238,033 | 120,340 | 199,065 |
| HG04200 | 14,394,808 | 240,211 | 123,688 | 202,524 |
| HG04202 | 14,402,215 | 239,405 | 121,788 | 200,469 |
| HG04209 | 14,406,323 | 236,740 | 121,419 | 199,441 |
| HG01097 | 14,495,576 | 238,393 | 121,251 | 200,222 |
| HG02691 | 14,399,905 | 239,277 | 121,965 | 201,648 |
| HG02690 | 14,508,617 | 233,590 | 118,667 | 195,004 |
| HG02694 | 14,425,234 | 230,569 | 117,402 | 192,805 |
| HG02697 | 14,391,354 | 242,538 | 125,123 | 202,805 |
| HG02696 | 14,490,696 | 240,490 | 123,139 | 200,991 |
| HG02699 | 14,502,773 | 234,498 | 120,146 | 197,176 |
| HG01926 | 14,527,747 | 226,419 | 114,814 | 188,279 |
| HG01927 | 14,423,355 | 231,221 | 118,037 | 192,661 |
| HG01924 | 14,380,789 | 244,048 | 125,752 | 207,223 |
| HG01923 | 14,526,372 | 225,638 | 115,168 | 189,734 |
| HG01920 | 14,517,494 | 228,101 | 117,335 | 191,763 |
| HG01921 | 14,419,050 | 232,705 | 118,105 | 194,001 |
| HG00327 | 14,407,497 | 237,218 | 120,885 | 197,376 |
| HG00326 | 14,408,370 | 236,092 | 121,804 | 198,573 |
| HG00325 | 14,507,497 | 233,609 | 120,096 | 195,107 |
| HG00324 | 14,378,884 | 232,793 | 119,713 | 234,219 |
| HG00323 | 14,409,604 | 235,403 | 121,568 | 197,950 |
| HG00321 | 14,510,227 | 233,147 | 118,188 | 194,240 |
| HG00320 | 14,411,742 | 235,157 | 120,303 | 196,947 |
| HG03604 | 14,397,392 | 240,019 | 123,218 | 202,048 |
| HG04062 | 14,393,963 | 242,264 | 123,004 | 202,410 |
| HG00329 | 14,508,219 | 233,953 | 118,762 | 195,192 |
| HG00328 | 14,412,676 | 233,908 | 120,689 | 196,743 |
| HG01536 | 14,594,134 | 235,145 | 119,914 | 197,806 |
| HG03986 | 14,385,873 | 244,641 | 125,966 | 205,454 |
| HG03985 | 14,499,964 | 236,459 | 119,542 | 197,911 |
| HG03989 | 14,403,557 | 237,523 | 121,277 | 199,508 |
| NA20868 | 14,396,115 | 241,590 | 123,115 | 202,420 |
| NA20869 | 14,399,981 | 239,662 | 122,187 | 202,018 |
| NA20318 | 14,427,635 | 264,335 | 131,839 | 225,295 |
| NA20314 | 14,406,183 | 237,751 | 122,307 | 198,409 |
| NA20863 | 14,482,202 | 241,502 | 124,142 | 204,445 |
| NA20861 | 14,504,740 | 234,513 | 118,940 | 198,084 |
| NA20866 | 14,498,925 | 236,160 | 120,887 | 198,703 |
| NA20867 | 14,499,250 | 237,235 | 120,673 | 198,279 |
| NA20864 | 14,498,766 | 237,300 | 120,275 | 198,432 |
| HG00662 | 14,505,970 | 234,763 | 118,573 | 196,091 |
| HG00663 | 14,412,814 | 235,320 | 119,877 | 196,695 |
| HG01843 | 14,407,256 | 236,166 | 121,143 | 199,288 |
| NA20790 | 14,410,022 | 235,436 | 120,793 | 198,062 |
| NA20792 | 14,508,957 | 233,103 | 118,979 | 195,521 |
| NA20795 | 14,409,342 | 235,837 | 120,557 | 198,544 |
| NA20796 | 14,513,775 | 231,695 | 116,831 | 193,714 |
| NA20797 | 14,408,766 | 235,269 | 121,066 | 198,819 |
| NA20798 | 14,498,179 | 236,264 | 121,363 | 198,131 |
| NA20799 | 14,409,554 | 236,140 | 120,567 | 197,850 |
| HG03520 | 14,283,304 | 280,455 | 144,451 | 244,218 |
| NA21137 | 14,387,958 | 244,461 | 125,240 | 204,749 |
| NA21135 | 14,499,941 | 237,159 | 119,783 | 197,613 |
| HG02031 | 14,408,689 | 236,118 | 120,212 | 198,729 |
| HG02032 | 14,489,427 | 239,020 | 122,513 | 200,942 |
| HG01915 | 14,296,845 | 275,258 | 140,577 | 240,547 |
| HG01628 | 14,406,520 | 236,412 | 120,894 | 199,701 |
| NA19113 | 14,416,576 | 268,183 | 134,231 | 230,628 |
| HG01625 | 14,488,487 | 237,916 | 123,072 | 202,411 |
| HG01624 | 14,508,381 | 233,207 | 118,155 | 195,821 |
| HG01626 | 14,409,989 | 235,508 | 120,318 | 198,630 |
| HG01620 | 14,404,554 | 236,915 | 121,633 | 199,191 |
| HG01623 | 14,407,046 | 237,231 | 120,024 | 199,298 |
| NA19439 | 14,300,088 | 274,984 | 139,317 | 238,496 |

|         |            |         |         |         |
|---------|------------|---------|---------|---------|
| NA19438 | 14,298,694 | 274,541 | 140,635 | 240,108 |
| NA19435 | 14,293,287 | 277,023 | 141,801 | 240,513 |
| NA19434 | 14,298,955 | 274,908 | 139,911 | 238,713 |
| NA19437 | 14,293,729 | 275,664 | 142,461 | 241,062 |
| NA19436 | 14,298,101 | 274,318 | 141,034 | 239,389 |
| NA19431 | 14,296,498 | 274,611 | 140,394 | 240,296 |
| NA19430 | 14,406,055 | 270,985 | 136,564 | 233,185 |
| HG00190 | 14,508,568 | 232,784 | 119,396 | 195,333 |
| NA19185 | 14,295,877 | 275,621 | 141,117 | 239,788 |
| NA19184 | 14,412,978 | 269,644 | 134,631 | 231,332 |
| NA19189 | 14,419,593 | 267,364 | 134,892 | 228,355 |
| NA19065 | 14,406,519 | 237,590 | 120,807 | 198,632 |
| HG00380 | 14,414,388 | 234,058 | 119,216 | 197,330 |
| HG02108 | 14,308,684 | 271,097 | 138,948 | 235,681 |
| HG02102 | 14,411,195 | 235,106 | 120,754 | 196,457 |
| HG02105 | 14,428,429 | 228,644 | 117,135 | 191,988 |
| HG02104 | 14,517,589 | 229,777 | 116,862 | 191,836 |
| HG02107 | 14,381,106 | 279,323 | 143,125 | 241,482 |
| NA20884 | 14,501,192 | 236,103 | 120,232 | 198,772 |
| HG00443 | 14,408,589 | 236,125 | 120,042 | 198,010 |
| NA20886 | 14,405,294 | 237,355 | 121,456 | 199,388 |
| NA20887 | 14,503,519 | 235,681 | 119,798 | 197,411 |
| HG00446 | 14,409,618 | 236,163 | 120,081 | 197,770 |
| NA20881 | 14,399,651 | 238,791 | 122,806 | 201,801 |
| NA20882 | 14,401,715 | 238,865 | 121,987 | 201,396 |
| HG00445 | 14,503,640 | 235,496 | 119,267 | 197,150 |
| HG01131 | 14,391,689 | 242,743 | 124,166 | 204,343 |
| HG01130 | 14,495,542 | 238,353 | 121,167 | 199,965 |
| HG01133 | 14,500,826 | 237,122 | 119,833 | 197,577 |
| HG00449 | 14,410,770 | 235,429 | 120,235 | 198,160 |
| NA20888 | 14,405,201 | 237,526 | 121,397 | 199,771 |
| NA20889 | 14,503,546 | 235,094 | 119,345 | 197,752 |
| HG01137 | 14,398,112 | 239,531 | 123,410 | 201,408 |
| HG01136 | 14,483,618 | 243,151 | 123,328 | 203,056 |
| HG00684 | 14,408,320 | 236,886 | 120,411 | 198,484 |
| HG02968 | 14,413,812 | 270,125 | 134,739 | 230,106 |
| HG00683 | 14,502,905 | 234,900 | 119,902 | 196,628 |
| HG00689 | 14,506,018 | 233,687 | 119,464 | 196,334 |
| NA19761 | 14,393,986 | 241,581 | 123,762 | 202,694 |
| NA19762 | 14,490,513 | 240,339 | 122,056 | 200,958 |
| NA19764 | 14,387,819 | 243,917 | 125,081 | 205,240 |
| NA19984 | 14,426,356 | 265,795 | 132,583 | 226,667 |
| NA19982 | 14,414,443 | 269,656 | 135,001 | 229,611 |
| HG02215 | 14,411,658 | 235,462 | 120,446 | 197,154 |
| NA19704 | 14,265,499 | 273,341 | 139,061 | 274,934 |
| HG02219 | 14,512,634 | 231,978 | 117,916 | 194,976 |
| HG03342 | 14,293,660 | 277,048 | 140,945 | 240,151 |
| HG03343 | 14,414,815 | 269,668 | 133,906 | 228,455 |
| NA18582 | 14,407,907 | 237,363 | 120,064 | 199,232 |
| NA19347 | 14,395,114 | 273,915 | 138,487 | 236,083 |
| NA18749 | 14,487,446 | 238,737 | 122,939 | 202,487 |
| NA12717 | 14,403,923 | 237,744 | 122,853 | 200,512 |
| NA12716 | 14,507,594 | 234,211 | 119,943 | 195,354 |
| HG00536 | 14,502,008 | 235,579 | 119,891 | 197,044 |
| HG00537 | 14,414,658 | 234,402 | 119,340 | 196,567 |
| HG00534 | 14,408,594 | 236,161 | 120,542 | 198,104 |
| NA18747 | 14,507,532 | 233,710 | 118,435 | 195,823 |
| NA18740 | 14,506,119 | 234,507 | 118,910 | 195,595 |
| HG00533 | 14,511,177 | 232,773 | 117,914 | 194,806 |
| HG00530 | 14,488,941 | 237,029 | 123,780 | 201,669 |
| HG00531 | 14,412,241 | 235,469 | 119,981 | 196,977 |
| NA18564 | 14,366,784 | 237,584 | 120,967 | 238,058 |
| NA18565 | 14,408,779 | 235,647 | 120,615 | 197,844 |
| NA18566 | 14,409,257 | 235,242 | 120,393 | 198,176 |
| NA18567 | 14,407,815 | 237,250 | 120,172 | 197,820 |
| NA18560 | 14,407,674 | 236,834 | 120,511 | 198,029 |
| NA18561 | 14,483,275 | 239,264 | 124,211 | 203,843 |
| NA18562 | 14,508,091 | 234,305 | 117,838 | 195,114 |
| NA18563 | 14,506,522 | 233,895 | 118,991 | 196,134 |



|         |            |         |         |         |
|---------|------------|---------|---------|---------|
| HG02360 | 14,506,713 | 234,579 | 118,073 | 195,446 |
| HG02364 | 14,483,245 | 239,081 | 124,503 | 203,670 |
| HG02367 | 14,508,481 | 234,008 | 117,597 | 195,418 |
| HG01311 | 14,495,447 | 238,820 | 120,406 | 199,714 |
| NA20862 | 14,400,565 | 239,232 | 122,443 | 201,312 |
| NA12873 | 14,412,681 | 234,025 | 120,347 | 197,354 |
| NA20317 | 14,307,697 | 271,015 | 139,365 | 234,118 |
| HG03762 | 14,398,929 | 238,546 | 122,414 | 202,659 |
| HG03760 | 14,394,955 | 241,163 | 123,372 | 203,456 |
| HG03767 | 14,487,264 | 237,836 | 123,511 | 203,053 |
| HG03765 | 14,397,456 | 239,272 | 123,186 | 202,443 |
| HG03419 | 14,286,740 | 279,058 | 142,339 | 242,530 |
| HG03166 | 14,391,772 | 273,562 | 139,134 | 238,425 |
| HG03160 | 14,418,180 | 267,912 | 134,203 | 230,506 |
| HG03162 | 14,294,585 | 275,743 | 141,276 | 240,451 |
| HG03163 | 14,422,544 | 265,884 | 133,181 | 227,743 |
| HG03168 | 14,293,163 | 276,679 | 141,656 | 239,527 |
| HG03169 | 14,418,146 | 267,228 | 134,218 | 229,205 |
| NA12342 | 14,508,271 | 233,397 | 118,660 | 194,856 |
| HG03202 | 14,393,133 | 274,164 | 139,401 | 237,137 |
| HG00105 | 14,487,028 | 239,169 | 124,473 | 201,801 |
| HG02756 | 14,408,778 | 271,938 | 136,725 | 231,765 |
| HG02757 | 14,285,393 | 280,145 | 144,330 | 242,764 |
| NA12889 | 14,488,403 | 237,755 | 123,504 | 202,182 |
| HG02759 | 14,407,888 | 268,575 | 136,906 | 233,308 |
| HG00844 | 14,507,700 | 234,188 | 118,304 | 195,962 |
| NA18968 | 14,401,598 | 239,318 | 123,267 | 200,330 |
| NA18969 | 14,413,444 | 234,224 | 119,761 | 196,534 |
| HG02597 | 14,501,064 | 235,490 | 120,289 | 197,986 |
| HG02594 | 14,406,846 | 272,271 | 137,720 | 232,582 |
| HG02595 | 14,287,097 | 278,956 | 144,097 | 243,254 |
| NA18960 | 14,486,764 | 239,398 | 123,046 | 202,353 |
| NA18961 | 14,508,259 | 233,869 | 118,713 | 194,497 |
| NA18962 | 14,509,879 | 233,327 | 118,070 | 194,742 |
| NA18963 | 14,371,469 | 235,914 | 120,193 | 236,002 |
| NA18964 | 14,415,628 | 233,984 | 119,493 | 195,880 |
| NA18965 | 14,489,984 | 237,372 | 122,254 | 202,092 |
| NA18966 | 14,501,150 | 236,487 | 120,915 | 197,391 |
| NA18967 | 14,493,353 | 236,834 | 121,600 | 199,878 |
| NA19735 | 14,517,386 | 230,358 | 116,780 | 192,118 |
| NA11992 | 14,503,130 | 235,026 | 120,476 | 197,277 |
| HG03572 | 14,288,660 | 277,496 | 141,742 | 243,048 |
| HG03571 | 14,411,183 | 270,281 | 134,708 | 230,978 |
| HG03577 | 14,411,322 | 269,409 | 135,620 | 231,722 |
| NA11994 | 14,506,907 | 235,281 | 118,578 | 195,259 |
| NA11995 | 14,407,144 | 235,918 | 121,827 | 198,220 |
| HG01405 | 14,483,406 | 242,894 | 124,365 | 203,877 |
| HG03578 | 14,295,247 | 275,681 | 141,515 | 240,449 |
| NA19657 | 14,400,442 | 238,544 | 121,821 | 201,034 |
| HG04235 | 14,495,746 | 237,937 | 120,756 | 200,161 |
| HG04239 | 14,476,534 | 242,901 | 125,680 | 206,279 |
| HG00554 | 14,393,887 | 241,396 | 124,035 | 203,875 |
| NA19360 | 14,414,928 | 270,319 | 134,491 | 229,337 |
| HG00650 | 14,508,617 | 233,538 | 118,240 | 195,250 |
| HG00556 | 14,510,395 | 232,708 | 117,758 | 194,729 |
| HG02688 | 14,388,458 | 244,352 | 125,940 | 204,685 |
| HG02687 | 14,473,616 | 243,538 | 126,726 | 207,540 |
| HG02684 | 14,514,728 | 230,107 | 118,896 | 192,933 |
| HG02685 | 14,400,344 | 239,312 | 123,944 | 200,630 |
| HG02682 | 14,396,344 | 240,788 | 123,501 | 201,861 |
| HG02681 | 14,500,361 | 237,330 | 120,288 | 198,387 |
| HG03888 | 14,392,167 | 242,075 | 124,993 | 203,773 |
| HG03882 | 14,389,446 | 242,974 | 125,097 | 204,630 |
| HG03887 | 14,458,753 | 237,644 | 121,238 | 237,968 |
| HG03886 | 14,390,265 | 242,820 | 125,631 | 204,605 |
| HG03885 | 14,494,877 | 238,933 | 121,756 | 199,473 |
| HG03884 | 14,398,401 | 239,160 | 124,263 | 201,957 |
| HG01489 | 14,403,919 | 238,722 | 120,667 | 199,267 |
| HG01488 | 14,485,089 | 242,383 | 122,821 | 203,720 |

|         |            |         |         |         |
|---------|------------|---------|---------|---------|
| HG01958 | 14,296,584 | 274,338 | 141,531 | 239,146 |
| HG01953 | 14,506,650 | 235,497 | 120,210 | 194,893 |
| HG01951 | 14,423,701 | 231,638 | 117,627 | 193,300 |
| HG01950 | 14,511,128 | 232,588 | 117,655 | 194,785 |
| HG01485 | 14,437,426 | 258,337 | 133,230 | 221,019 |
| HG01956 | 14,296,841 | 275,890 | 141,192 | 239,898 |
| HG01954 | 14,408,569 | 235,977 | 122,121 | 197,322 |
| HG00334 | 14,407,916 | 235,369 | 120,950 | 198,516 |
| NA20412 | 14,308,371 | 271,178 | 138,964 | 235,143 |
| NA12155 | 14,487,957 | 238,133 | 123,359 | 202,312 |
| HG00337 | 14,408,468 | 236,508 | 121,094 | 197,937 |
| HG00330 | 14,410,589 | 234,837 | 120,528 | 198,011 |
| HG03096 | 14,401,815 | 274,361 | 138,300 | 236,005 |
| HG00332 | 14,406,277 | 237,298 | 121,941 | 198,694 |
| NA19075 | 14,509,896 | 233,472 | 117,804 | 194,489 |
| HG03097 | 14,275,139 | 282,890 | 146,568 | 247,675 |
| HG00338 | 14,510,190 | 232,709 | 118,153 | 194,085 |
| HG00339 | 14,411,524 | 235,527 | 120,203 | 197,025 |
| HG03401 | 14,288,750 | 278,407 | 141,684 | 242,908 |
| HG02979 | 14,293,457 | 275,897 | 140,961 | 240,411 |
| HG00879 | 14,410,917 | 235,725 | 120,332 | 197,592 |
| HG03099 | 14,286,057 | 279,669 | 145,100 | 242,966 |
| HG02970 | 14,295,675 | 276,284 | 140,818 | 240,334 |
| HG02971 | 14,409,509 | 270,860 | 136,196 | 231,352 |
| HG03974 | 14,477,721 | 241,842 | 124,676 | 206,504 |
| HG03973 | 14,402,465 | 238,202 | 121,422 | 201,134 |
| HG02976 | 14,292,768 | 277,658 | 141,936 | 241,176 |
| HG02977 | 14,411,168 | 270,619 | 135,371 | 231,503 |
| NA18910 | 14,416,833 | 268,923 | 134,411 | 230,119 |
| NA20321 | 14,304,836 | 273,629 | 139,963 | 236,274 |
| NA20320 | 14,293,609 | 276,694 | 141,486 | 240,547 |
| NA18548 | 14,505,102 | 234,601 | 119,216 | 196,011 |
| HG03123 | 14,281,548 | 280,779 | 145,716 | 246,152 |
| NA12234 | 14,402,884 | 238,469 | 122,217 | 199,766 |
| HG01556 | 14,452,604 | 251,520 | 129,222 | 214,558 |
| HG01551 | 14,341,085 | 260,200 | 134,144 | 222,987 |
| HG01550 | 14,472,666 | 244,218 | 126,303 | 207,032 |
| NA20529 | 14,408,542 | 237,254 | 120,499 | 197,638 |
| NA20528 | 14,489,436 | 237,658 | 122,805 | 202,738 |
| NA20527 | 14,505,865 | 234,471 | 119,176 | 195,866 |
| NA20525 | 14,505,730 | 234,166 | 120,008 | 196,298 |
| NA20524 | 14,508,793 | 232,490 | 118,418 | 195,683 |
| NA20522 | 14,410,448 | 235,656 | 120,317 | 198,182 |
| NA20521 | 14,507,677 | 232,120 | 119,548 | 195,604 |
| NA20520 | 14,505,469 | 234,354 | 119,028 | 196,208 |
| HG02028 | 14,413,609 | 235,059 | 119,269 | 197,186 |
| HG02029 | 14,492,042 | 236,877 | 122,210 | 201,770 |
| NA21128 | 14,503,616 | 234,848 | 119,443 | 197,586 |
| NA21129 | 14,493,134 | 238,865 | 122,269 | 200,782 |
| NA21124 | 14,493,403 | 238,826 | 122,093 | 199,570 |
| NA21125 | 14,384,624 | 245,451 | 126,388 | 206,002 |
| NA21126 | 14,496,893 | 238,276 | 121,566 | 199,562 |
| NA21127 | 14,485,917 | 240,700 | 123,991 | 202,791 |
| NA21120 | 14,398,075 | 239,625 | 122,911 | 202,023 |
| NA21122 | 14,402,426 | 238,565 | 121,285 | 200,059 |
| NA21123 | 14,480,845 | 240,825 | 124,604 | 204,561 |
| HG01632 | 14,398,456 | 239,575 | 124,386 | 201,038 |
| HG01630 | 14,504,527 | 234,194 | 119,103 | 197,530 |
| HG01631 | 14,507,216 | 234,600 | 119,331 | 195,281 |
| NA19428 | 14,396,037 | 273,101 | 139,223 | 237,196 |
| NA19429 | 14,417,040 | 268,196 | 133,664 | 228,883 |
| HG03511 | 14,325,410 | 269,405 | 134,337 | 230,509 |
| HG02035 | 14,501,671 | 236,388 | 119,956 | 197,821 |
| HG02116 | 14,507,558 | 233,846 | 118,672 | 195,217 |
| NA19190 | 14,292,021 | 276,245 | 142,192 | 242,625 |
| NA19197 | 14,290,466 | 277,645 | 142,647 | 241,430 |
| HG02111 | 14,294,463 | 275,770 | 142,168 | 241,059 |
| NA21133 | 14,501,200 | 235,938 | 119,517 | 197,988 |
| NA19198 | 14,395,026 | 273,698 | 138,914 | 237,219 |

|         |            |         |         |         |
|---------|------------|---------|---------|---------|
| HG01124 | 14,477,513 | 244,613 | 125,455 | 206,190 |
| HG01125 | 14,388,136 | 243,910 | 124,983 | 206,173 |
| HG01122 | 14,394,798 | 241,039 | 123,828 | 203,482 |
| HG01121 | 14,496,762 | 236,976 | 121,580 | 198,826 |
| NA21130 | 14,481,580 | 240,734 | 123,739 | 203,918 |
| NA12413 | 14,510,817 | 232,131 | 118,351 | 194,604 |
| NA12414 | 14,407,890 | 236,880 | 121,032 | 197,905 |
| HG00102 | 14,408,670 | 234,882 | 122,306 | 199,118 |
| NA19779 | 14,389,961 | 243,179 | 124,681 | 204,043 |
| NA19776 | 14,385,196 | 244,903 | 125,422 | 206,146 |
| NA19777 | 14,482,664 | 244,050 | 123,982 | 203,500 |
| NA19774 | 14,496,465 | 238,118 | 120,921 | 198,818 |
| NA18748 | 14,509,291 | 233,257 | 118,151 | 195,220 |
| NA19770 | 14,388,110 | 243,063 | 126,008 | 205,152 |
| NA19771 | 14,477,646 | 243,570 | 124,979 | 205,080 |
| HG03378 | 14,285,086 | 278,844 | 142,897 | 244,245 |
| HG03370 | 14,414,791 | 268,734 | 134,563 | 230,743 |
| HG03372 | 14,294,868 | 276,690 | 140,388 | 239,931 |
| HG03376 | 14,416,632 | 268,594 | 134,242 | 230,745 |
| NA20814 | 14,506,712 | 234,048 | 118,986 | 196,314 |
| HG01075 | 14,491,555 | 239,290 | 120,578 | 201,679 |
| NA19350 | 14,396,200 | 273,893 | 138,482 | 236,611 |
| NA19351 | 14,289,348 | 277,450 | 143,190 | 242,468 |
| NA19456 | 14,297,551 | 275,537 | 140,401 | 238,879 |
| NA19355 | 14,291,737 | 277,022 | 142,012 | 240,780 |
| HG00543 | 14,403,605 | 238,641 | 121,008 | 199,025 |
| HG01070 | 14,392,866 | 241,850 | 124,037 | 204,149 |
| HG03082 | 14,287,653 | 277,893 | 142,659 | 243,294 |
| HG03081 | 14,412,838 | 269,727 | 134,052 | 232,010 |
| NA18552 | 14,409,766 | 235,513 | 120,611 | 197,834 |
| NA18555 | 14,407,467 | 237,604 | 120,412 | 197,921 |
| HG01072 | 14,473,531 | 244,811 | 125,053 | 205,952 |
| HG03085 | 14,272,252 | 283,454 | 147,381 | 246,986 |
| HG03084 | 14,402,673 | 274,166 | 138,683 | 234,640 |
| NA18559 | 14,485,585 | 239,048 | 123,988 | 203,097 |
| NA18558 | 14,506,539 | 233,765 | 119,094 | 196,113 |
| HG03088 | 14,292,892 | 276,874 | 141,748 | 241,416 |
| NA18486 | 14,415,711 | 268,557 | 134,651 | 230,270 |
| HG02379 | 14,506,427 | 234,572 | 118,586 | 195,016 |
| NA18489 | 14,288,079 | 277,642 | 142,972 | 242,401 |
| NA18488 | 14,293,286 | 277,228 | 141,347 | 241,059 |
| HG02373 | 14,485,719 | 238,551 | 123,693 | 202,945 |
| HG02371 | 14,487,553 | 238,945 | 122,075 | 202,058 |
| HG01308 | 14,473,034 | 247,882 | 124,448 | 207,829 |
| HG01305 | 14,485,779 | 242,387 | 122,532 | 204,287 |
| HG01302 | 14,466,646 | 244,908 | 128,011 | 209,985 |
| HG01303 | 14,389,929 | 243,810 | 124,214 | 204,538 |
| HG03796 | 14,385,875 | 244,691 | 127,182 | 205,562 |
| HG03793 | 14,389,831 | 242,874 | 124,715 | 203,973 |
| HG03792 | 14,484,946 | 238,960 | 123,576 | 203,835 |
| HG03790 | 14,500,084 | 235,754 | 120,073 | 197,867 |
| NA18745 | 14,500,115 | 234,544 | 120,142 | 197,982 |
| HG03157 | 14,413,201 | 269,862 | 135,000 | 231,405 |
| HG03159 | 14,296,779 | 274,844 | 140,710 | 240,753 |
| HG00378 | 14,410,402 | 235,537 | 120,440 | 197,018 |
| HG00379 | 14,411,549 | 234,714 | 120,795 | 197,446 |
| NA19451 | 14,420,630 | 267,825 | 133,094 | 227,596 |
| HG03687 | 14,502,943 | 234,745 | 120,103 | 197,318 |
| NA18954 | 14,413,163 | 234,636 | 119,435 | 197,414 |
| NA18957 | 14,411,953 | 235,115 | 120,299 | 197,280 |
| NA18956 | 14,408,757 | 236,914 | 120,742 | 198,003 |
| HG02769 | 14,287,597 | 278,566 | 143,926 | 242,608 |
| HG02768 | 14,408,229 | 272,132 | 136,487 | 233,098 |
| NA18953 | 14,491,798 | 237,333 | 122,815 | 200,241 |
| NA18952 | 14,485,312 | 239,034 | 123,663 | 202,517 |
| HG03681 | 14,495,815 | 237,765 | 122,256 | 199,846 |
| NA18959 | 14,481,466 | 241,203 | 124,500 | 203,357 |
| HG02760 | 14,291,156 | 277,983 | 141,627 | 241,227 |
| HG02763 | 14,306,709 | 271,266 | 138,462 | 235,068 |

|         |            |         |         |         |
|---------|------------|---------|---------|---------|
| HG02568 | 14,297,419 | 274,484 | 141,223 | 239,467 |
| HG02562 | 14,285,537 | 279,592 | 144,909 | 243,979 |
| HG02561 | 14,406,629 | 271,629 | 138,094 | 233,527 |
| HG03833 | 14,497,754 | 237,613 | 120,139 | 198,976 |
| HG03836 | 14,406,248 | 236,989 | 120,898 | 199,155 |
| HG03837 | 14,522,623 | 227,603 | 116,073 | 192,075 |
| HG00235 | 14,416,220 | 233,227 | 119,493 | 196,254 |
| HG00234 | 14,509,642 | 231,920 | 118,485 | 194,770 |
| HG00237 | 14,371,957 | 235,372 | 120,637 | 236,165 |
| HG00236 | 14,405,178 | 236,877 | 121,881 | 199,481 |
| HG00231 | 14,409,452 | 235,824 | 121,075 | 198,353 |
| HG03565 | 14,410,934 | 270,965 | 134,910 | 232,303 |
| HG00233 | 14,405,757 | 237,203 | 121,986 | 199,242 |
| HG03567 | 14,283,356 | 279,771 | 143,219 | 244,041 |
| HG00239 | 14,406,807 | 236,217 | 121,836 | 199,590 |
| HG00238 | 14,408,614 | 236,196 | 122,068 | 198,480 |
| HG01486 | 14,379,401 | 245,566 | 129,268 | 208,374 |
| NA18550 | 14,407,570 | 237,226 | 120,297 | 197,905 |
| HG04229 | 14,489,677 | 240,351 | 121,705 | 201,135 |
| HG04227 | 14,394,046 | 241,854 | 123,566 | 204,251 |
| HG04225 | 14,484,969 | 241,672 | 123,466 | 203,310 |
| HG04222 | 14,473,719 | 244,491 | 125,318 | 206,446 |
| HG03898 | 14,397,896 | 240,260 | 123,590 | 202,608 |
| HG01497 | 14,483,811 | 241,318 | 124,361 | 202,925 |
| HG01494 | 14,489,866 | 241,627 | 122,051 | 201,439 |
| HG01495 | 14,381,810 | 246,637 | 126,560 | 206,864 |
| HG01492 | 14,399,448 | 239,403 | 121,883 | 201,660 |
| HG01066 | 14,496,037 | 238,000 | 120,912 | 199,630 |
| HG03890 | 14,497,719 | 237,546 | 120,729 | 199,576 |
| HG03894 | 14,402,143 | 238,482 | 121,538 | 200,955 |
| HG03895 | 14,407,465 | 236,581 | 120,348 | 198,694 |
| HG03896 | 14,503,612 | 235,628 | 120,015 | 196,763 |
| HG03897 | 14,402,395 | 239,265 | 121,350 | 199,942 |
| HG01948 | 14,364,520 | 250,183 | 129,596 | 212,306 |
| HG01941 | 14,502,055 | 234,962 | 120,450 | 196,910 |
| HG01942 | 14,383,149 | 231,088 | 119,050 | 232,710 |
| HG01944 | 14,497,787 | 237,334 | 120,429 | 198,181 |
| HG01945 | 14,416,623 | 232,910 | 119,034 | 195,218 |
| HG01947 | 14,502,313 | 235,711 | 119,951 | 197,466 |
| NA12144 | 14,509,625 | 232,519 | 118,651 | 195,613 |
| HG02944 | 14,406,202 | 272,554 | 137,831 | 232,966 |
| HG02947 | 14,403,666 | 272,414 | 136,126 | 234,123 |
| HG02946 | 14,293,219 | 276,496 | 142,139 | 240,725 |
| HG02941 | 14,388,925 | 275,511 | 141,376 | 239,739 |
| HG00304 | 14,410,110 | 235,720 | 120,668 | 197,691 |
| HG02943 | 14,285,785 | 279,722 | 143,971 | 243,958 |
| HG00306 | 14,413,431 | 233,971 | 119,947 | 197,197 |
| HG00309 | 14,410,290 | 235,543 | 120,369 | 198,155 |
| HG00308 | 14,491,975 | 236,383 | 122,707 | 201,313 |
| HG03410 | 14,291,160 | 277,279 | 141,759 | 242,178 |
| HG02787 | 14,392,425 | 242,345 | 124,376 | 202,995 |
| HG02786 | 14,493,481 | 239,506 | 121,739 | 200,418 |
| HG02784 | 14,387,398 | 243,610 | 126,353 | 204,604 |
| HG03968 | 14,402,248 | 238,275 | 122,144 | 200,763 |
| HG03969 | 14,499,647 | 237,135 | 120,052 | 198,593 |
| HG02780 | 14,510,915 | 233,084 | 117,738 | 194,716 |
| HG03965 | 14,498,219 | 237,507 | 120,164 | 198,957 |
| HG03967 | 14,499,953 | 236,129 | 119,559 | 197,295 |
| HG03960 | 14,492,659 | 238,433 | 122,104 | 200,910 |
| HG02789 | 14,491,479 | 240,019 | 122,623 | 201,078 |
| HG03963 | 14,497,385 | 237,485 | 120,254 | 199,498 |
| HG04039 | 14,496,541 | 238,275 | 120,571 | 199,018 |
| HG04038 | 14,402,295 | 238,311 | 122,022 | 201,250 |
| HG04035 | 14,398,418 | 239,947 | 122,859 | 202,419 |
| HG04033 | 14,497,864 | 238,216 | 120,115 | 198,489 |
| NA20538 | 14,466,202 | 239,863 | 124,253 | 221,936 |
| NA20539 | 14,512,460 | 231,977 | 117,945 | 194,939 |
| NA20534 | 14,486,136 | 238,280 | 124,480 | 203,207 |
| NA20535 | 14,413,216 | 234,602 | 119,387 | 197,542 |

|         |            |         |         |         |
|---------|------------|---------|---------|---------|
| NA20536 | 14,506,023 | 234,100 | 118,964 | 195,790 |
| NA20530 | 14,428,489 | 232,068 | 116,463 | 191,765 |
| NA20531 | 14,409,907 | 235,289 | 119,945 | 198,166 |
| NA20532 | 14,507,029 | 233,662 | 119,488 | 196,792 |
| NA20533 | 14,424,259 | 232,221 | 116,796 | 193,870 |
| NA21119 | 14,499,757 | 237,471 | 120,297 | 197,854 |
| NA21118 | 14,497,662 | 237,465 | 120,626 | 199,028 |
| NA20756 | 14,408,619 | 235,835 | 121,210 | 198,734 |
| NA20757 | 14,411,009 | 235,320 | 120,829 | 197,565 |
| NA20752 | 14,507,619 | 233,752 | 118,876 | 195,976 |
| NA20753 | 14,404,370 | 237,336 | 122,181 | 200,788 |
| NA21111 | 14,498,871 | 236,793 | 119,888 | 198,989 |
| NA21110 | 14,400,970 | 238,937 | 121,734 | 201,352 |
| NA21113 | 14,500,731 | 236,606 | 119,421 | 198,144 |
| NA21112 | 14,479,672 | 241,289 | 124,745 | 204,532 |
| NA21115 | 14,482,001 | 240,054 | 124,140 | 204,306 |
| NA20759 | 14,507,127 | 233,327 | 118,828 | 196,006 |
| NA21117 | 14,498,918 | 236,438 | 120,168 | 199,455 |
| NA21116 | 14,500,673 | 237,250 | 119,820 | 198,223 |
| NA07048 | 14,510,052 | 232,825 | 117,944 | 194,961 |
| NA06989 | 14,410,937 | 235,067 | 120,073 | 197,483 |
| NA12399 | 14,514,076 | 230,658 | 118,058 | 193,958 |
| NA20334 | 14,316,583 | 268,250 | 138,064 | 231,961 |
| NA20332 | 14,308,362 | 272,371 | 138,758 | 235,207 |
| HG01060 | 14,492,718 | 238,478 | 122,587 | 202,018 |
| HG00448 | 14,504,805 | 235,400 | 118,642 | 195,902 |
| NA20339 | 14,298,427 | 274,407 | 140,393 | 239,605 |
| HG02166 | 14,412,734 | 234,651 | 119,658 | 196,757 |
| HG02165 | 14,413,182 | 234,446 | 118,763 | 196,818 |
| HG02164 | 14,418,348 | 233,994 | 117,936 | 194,908 |
| HG04001 | 14,404,015 | 237,681 | 121,608 | 200,147 |
| NA19160 | 14,410,997 | 269,887 | 136,006 | 231,597 |
| NA19669 | 14,400,989 | 239,387 | 121,477 | 199,509 |
| HG01795 | 14,406,401 | 237,573 | 120,824 | 198,502 |
| HG01794 | 14,411,981 | 235,566 | 119,334 | 197,641 |
| HG01797 | 14,411,621 | 235,988 | 119,799 | 197,180 |
| HG01796 | 14,410,298 | 236,419 | 119,998 | 198,009 |
| HG01791 | 14,508,376 | 232,196 | 118,195 | 196,197 |
| HG01790 | 14,414,983 | 234,159 | 120,178 | 196,325 |
| HG01799 | 14,409,600 | 235,621 | 120,300 | 198,041 |
| HG01798 | 14,408,761 | 236,323 | 120,433 | 198,010 |
| HG03366 | 14,292,949 | 277,395 | 142,129 | 241,050 |
| HG03367 | 14,414,261 | 269,194 | 134,811 | 230,635 |
| HG03363 | 14,295,920 | 275,503 | 141,473 | 239,943 |
| NA19703 | 14,418,323 | 267,048 | 135,311 | 228,867 |
| NA19701 | 14,298,070 | 274,460 | 140,818 | 237,590 |
| NA19700 | 14,420,378 | 267,266 | 134,077 | 227,477 |
| NA19707 | 14,322,327 | 267,898 | 135,793 | 230,588 |
| HG03369 | 14,256,604 | 276,136 | 141,013 | 277,694 |
| HG01197 | 14,495,340 | 238,491 | 120,776 | 199,983 |
| HG02778 | 14,398,290 | 239,939 | 122,286 | 201,945 |
| HG00559 | 14,504,102 | 234,712 | 119,872 | 196,403 |
| NA12778 | 14,408,478 | 235,057 | 121,459 | 198,582 |
| NA19207 | 14,397,511 | 272,488 | 138,450 | 236,573 |
| HG00551 | 14,379,070 | 245,556 | 126,076 | 206,367 |
| HG00553 | 14,483,201 | 244,029 | 123,084 | 204,789 |
| NA12777 | 14,512,885 | 231,870 | 118,660 | 194,941 |
| NA12776 | 14,411,017 | 235,803 | 120,129 | 197,840 |
| NA12775 | 14,491,548 | 235,281 | 123,183 | 201,440 |
| HG00557 | 14,409,676 | 235,923 | 119,958 | 198,570 |
| NA19017 | 14,283,724 | 279,986 | 144,693 | 244,040 |
| HG03091 | 14,288,372 | 277,450 | 143,014 | 242,724 |
| HG01879 | 14,363,132 | 271,622 | 137,985 | 272,256 |
| NA19012 | 14,520,353 | 228,845 | 116,818 | 190,719 |
| NA19011 | 14,406,356 | 237,291 | 120,397 | 199,178 |
| NA18549 | 14,498,865 | 236,718 | 120,596 | 198,155 |
| NA18546 | 14,505,110 | 234,801 | 119,304 | 196,317 |
| NA18547 | 14,409,806 | 236,780 | 120,007 | 197,311 |
| NA18544 | 14,506,754 | 234,728 | 118,323 | 195,795 |

|         |            |         |         |         |
|---------|------------|---------|---------|---------|
| NA18545 | 14,414,785 | 233,641 | 119,307 | 197,446 |
| NA18542 | 14,407,738 | 236,770 | 120,376 | 198,011 |
| NA18543 | 14,503,891 | 234,416 | 119,388 | 196,676 |
| NA19019 | 14,287,029 | 279,532 | 143,489 | 242,755 |
| NA18541 | 14,407,132 | 237,783 | 120,991 | 197,622 |
| NA19385 | 14,408,410 | 272,202 | 136,336 | 232,095 |
| NA19384 | 14,410,761 | 270,803 | 135,329 | 231,533 |
| NA19383 | 14,396,748 | 272,797 | 138,596 | 236,702 |
| NA19380 | 14,376,585 | 269,526 | 134,892 | 268,102 |
| NA19076 | 14,510,097 | 232,017 | 118,151 | 194,611 |
| HG02309 | 14,295,089 | 275,768 | 141,914 | 240,222 |
| HG02308 | 14,298,465 | 273,748 | 140,784 | 239,824 |
| NA18498 | 14,418,145 | 267,256 | 134,203 | 229,385 |
| NA18499 | 14,289,706 | 278,083 | 142,687 | 242,913 |
| HG02301 | 14,410,845 | 235,779 | 119,790 | 196,763 |
| HG02307 | 14,420,985 | 266,717 | 133,131 | 229,304 |
| HG02304 | 14,502,215 | 235,896 | 119,528 | 197,364 |
| HG01378 | 14,400,937 | 239,046 | 122,694 | 200,450 |
| HG01372 | 14,397,025 | 240,771 | 122,597 | 202,577 |
| HG01377 | 14,484,231 | 243,394 | 122,582 | 203,396 |
| HG01375 | 14,383,032 | 245,440 | 125,288 | 207,645 |
| HG01374 | 14,504,402 | 234,606 | 119,345 | 197,562 |
| NA19043 | 14,408,459 | 270,804 | 137,395 | 233,536 |
| HG03788 | 14,490,462 | 240,367 | 123,013 | 200,741 |
| HG03789 | 14,386,905 | 243,489 | 126,121 | 205,724 |
| HG03598 | 14,394,032 | 241,975 | 122,513 | 202,650 |
| HG03784 | 14,394,128 | 240,883 | 124,360 | 202,518 |
| HG03785 | 14,484,392 | 239,534 | 124,260 | 203,118 |
| HG03786 | 14,496,126 | 237,853 | 121,555 | 199,397 |
| HG03787 | 14,386,790 | 244,515 | 125,523 | 205,268 |
| HG03780 | 14,400,883 | 239,062 | 122,132 | 201,274 |
| HG03781 | 14,389,485 | 243,197 | 125,580 | 204,925 |
| HG03782 | 14,399,409 | 240,189 | 122,165 | 201,561 |
| HG02410 | 14,498,769 | 237,782 | 121,091 | 198,380 |
| HG02419 | 14,293,505 | 277,036 | 141,774 | 241,273 |
| HG01205 | 14,379,319 | 247,437 | 126,850 | 208,327 |
| HG01204 | 14,490,725 | 239,972 | 121,709 | 201,692 |
| HG01200 | 14,504,201 | 236,071 | 119,676 | 196,954 |
| HG01809 | 14,410,643 | 235,821 | 120,149 | 197,627 |
| HG01808 | 14,405,836 | 237,057 | 120,966 | 199,614 |
| HG01805 | 14,407,036 | 236,647 | 120,861 | 198,420 |
| HG01804 | 14,408,683 | 236,640 | 119,877 | 198,582 |
| HG01807 | 14,410,950 | 236,057 | 119,906 | 197,249 |
| HG01806 | 14,409,268 | 236,415 | 120,159 | 198,654 |
| HG01801 | 14,406,648 | 237,414 | 120,548 | 198,730 |
| HG01800 | 14,415,364 | 233,766 | 118,852 | 195,849 |
| HG01802 | 14,410,582 | 236,074 | 119,694 | 198,069 |
| NA18942 | 14,412,866 | 234,974 | 119,538 | 197,171 |
| NA18943 | 14,484,461 | 239,901 | 123,685 | 202,695 |
| NA18940 | 14,508,585 | 233,303 | 118,563 | 194,773 |
| NA18941 | 14,415,518 | 233,148 | 119,773 | 197,101 |
| NA18946 | 14,407,157 | 237,181 | 120,496 | 198,210 |
| NA18947 | 14,406,848 | 236,610 | 121,578 | 198,972 |
| NA18944 | 14,505,453 | 235,032 | 118,845 | 196,607 |
| NA18945 | 14,506,553 | 234,111 | 119,180 | 195,343 |
| HG02772 | 14,286,453 | 279,319 | 143,558 | 242,981 |
| NA18948 | 14,504,669 | 234,785 | 119,284 | 196,584 |
| HG02771 | 14,407,513 | 272,541 | 136,687 | 233,057 |
| HG02774 | 14,476,632 | 242,821 | 124,677 | 205,925 |
| HG02775 | 14,396,466 | 240,323 | 123,725 | 202,547 |
| HG02574 | 14,288,090 | 277,629 | 144,207 | 242,899 |
| HG02577 | 14,299,764 | 274,011 | 140,374 | 236,789 |
| HG02570 | 14,404,823 | 273,019 | 137,851 | 233,485 |
| HG02571 | 14,282,337 | 280,197 | 145,112 | 244,672 |
| HG02573 | 14,389,784 | 276,467 | 140,850 | 238,507 |
| HG00956 | 14,406,361 | 237,352 | 121,360 | 199,070 |
| HG03559 | 14,409,398 | 270,932 | 134,936 | 232,554 |
| HG03558 | 14,283,873 | 279,854 | 143,376 | 244,610 |
| HG03557 | 14,290,743 | 277,647 | 141,733 | 241,641 |

|         |            |         |         |         |
|---------|------------|---------|---------|---------|
| HG03556 | 14,411,982 | 270,028 | 135,015 | 231,345 |
| HG01974 | 14,486,844 | 238,276 | 124,386 | 201,523 |
| HG01977 | 14,506,736 | 235,054 | 119,182 | 194,232 |
| HG01976 | 14,393,913 | 242,082 | 125,180 | 201,488 |
| HG01971 | 14,368,670 | 251,743 | 129,789 | 210,665 |
| HG01970 | 14,497,575 | 234,202 | 122,726 | 198,366 |
| HG01973 | 14,398,902 | 239,211 | 124,720 | 200,235 |
| HG01979 | 14,447,545 | 239,046 | 123,796 | 240,946 |
| NA12154 | 14,510,747 | 232,492 | 118,707 | 194,589 |
| HG02952 | 14,291,644 | 276,847 | 142,161 | 241,474 |
| HG02953 | 14,414,327 | 268,519 | 134,906 | 230,721 |
| HG00318 | 14,415,140 | 233,394 | 119,607 | 196,163 |
| HG00319 | 14,410,614 | 235,843 | 120,389 | 198,874 |
| HG00315 | 14,414,550 | 234,847 | 119,242 | 196,220 |
| HG00313 | 14,416,181 | 233,334 | 120,198 | 196,145 |
| HG00310 | 14,508,877 | 233,458 | 118,428 | 194,918 |
| HG00311 | 14,490,505 | 236,512 | 124,032 | 201,475 |
| HG02790 | 14,388,720 | 243,088 | 125,957 | 204,237 |
| HG02792 | 14,496,886 | 238,311 | 120,542 | 199,704 |
| HG02793 | 14,393,451 | 241,867 | 123,568 | 203,153 |
| HG03951 | 14,394,277 | 241,642 | 122,538 | 203,289 |
| HG03950 | 14,490,435 | 241,054 | 122,942 | 200,554 |
| HG03953 | 14,502,559 | 236,369 | 119,201 | 197,867 |
| HG03955 | 14,415,995 | 233,775 | 118,552 | 196,783 |
| HG02799 | 14,284,331 | 280,144 | 144,547 | 243,783 |
| NA19346 | 14,416,721 | 269,359 | 133,952 | 229,248 |
| NA12718 | 14,406,536 | 236,665 | 122,175 | 199,123 |
| NA19670 | 14,497,885 | 236,166 | 120,930 | 199,406 |
| HG01571 | 14,509,168 | 232,556 | 118,384 | 195,209 |
| HG01572 | 14,424,608 | 230,611 | 117,019 | 192,322 |
| HG04029 | 14,410,333 | 236,006 | 120,540 | 197,764 |
| HG01577 | 14,497,379 | 238,308 | 120,428 | 198,686 |
| HG04025 | 14,403,726 | 238,023 | 120,902 | 199,627 |
| HG04026 | 14,408,605 | 235,689 | 120,381 | 199,222 |
| HG04020 | 14,501,276 | 236,132 | 120,012 | 197,519 |
| HG04022 | 14,496,195 | 237,820 | 121,240 | 199,720 |
| HG04023 | 14,503,261 | 235,197 | 119,665 | 197,511 |
| NA20509 | 14,503,468 | 234,415 | 120,635 | 197,503 |
| NA20508 | 14,409,786 | 235,836 | 120,668 | 198,299 |
| HG01896 | 14,300,489 | 274,169 | 140,823 | 238,098 |
| NA20503 | 14,400,861 | 239,022 | 123,063 | 200,962 |
| NA20502 | 14,417,213 | 231,756 | 119,340 | 196,134 |
| NA20505 | 14,411,378 | 234,670 | 119,714 | 198,592 |
| NA20504 | 14,409,620 | 235,928 | 120,545 | 199,056 |
| NA20507 | 14,407,083 | 236,780 | 121,513 | 199,392 |
| NA20506 | 14,427,476 | 231,545 | 117,184 | 192,724 |
| NA20761 | 14,408,258 | 235,705 | 120,602 | 198,169 |
| HG03851 | 14,479,393 | 241,743 | 124,776 | 205,208 |
| NA20763 | 14,509,235 | 232,541 | 118,646 | 194,854 |
| NA20762 | 14,507,210 | 234,058 | 118,713 | 195,356 |
| NA20765 | 14,508,633 | 234,101 | 118,323 | 195,444 |
| NA20764 | 14,409,698 | 234,966 | 121,020 | 198,357 |
| NA20767 | 14,504,319 | 233,991 | 119,534 | 196,916 |
| NA20766 | 14,411,011 | 234,945 | 119,977 | 197,837 |
| NA20769 | 14,410,300 | 235,549 | 120,163 | 197,445 |
| NA20768 | 14,407,508 | 236,853 | 120,357 | 198,063 |
| NA20291 | 14,392,108 | 275,581 | 139,835 | 237,262 |
| NA07056 | 14,413,686 | 233,392 | 119,585 | 197,084 |
| NA20294 | 14,301,799 | 274,698 | 140,542 | 237,732 |
| NA12546 | 14,508,937 | 233,665 | 118,810 | 195,221 |
| NA20296 | 14,307,129 | 271,786 | 139,565 | 236,012 |
| NA20299 | 14,320,001 | 268,074 | 137,971 | 230,166 |
| NA20298 | 14,396,108 | 273,493 | 139,071 | 236,626 |
| NA12383 | 14,403,437 | 237,399 | 122,282 | 200,804 |
| HG00149 | 14,508,390 | 232,933 | 119,277 | 195,510 |
| HG00148 | 14,509,051 | 232,655 | 118,738 | 195,318 |
| HG00146 | 14,411,325 | 234,928 | 119,743 | 196,564 |
| HG00145 | 14,499,801 | 235,410 | 120,345 | 198,237 |
| HG00143 | 14,508,005 | 233,346 | 118,830 | 195,475 |

|         |            |         |         |         |
|---------|------------|---------|---------|---------|
| HG00142 | 14,489,431 | 237,846 | 123,133 | 201,908 |
| HG00141 | 14,504,366 | 234,218 | 119,489 | 196,286 |
| HG00140 | 14,509,978 | 232,928 | 118,191 | 194,697 |
| NA20342 | 14,429,842 | 264,051 | 132,707 | 223,854 |
| NA20340 | 14,417,115 | 268,390 | 134,115 | 228,565 |
| NA20346 | 14,399,348 | 272,653 | 139,148 | 234,967 |
| HG01849 | 14,507,311 | 234,342 | 118,651 | 195,608 |
| NA20348 | 14,405,102 | 271,122 | 137,530 | 233,394 |
| HG02178 | 14,411,157 | 235,287 | 120,509 | 197,475 |
| HG02179 | 14,411,383 | 235,259 | 119,634 | 197,407 |
| NA19171 | 14,412,227 | 269,873 | 135,492 | 231,230 |
| NA19172 | 14,292,133 | 276,448 | 142,406 | 241,065 |
| HG01140 | 14,389,144 | 244,000 | 124,923 | 203,895 |
| HG01142 | 14,474,210 | 246,383 | 124,610 | 207,212 |
| HG01148 | 14,502,951 | 234,728 | 119,786 | 196,539 |
| HG01149 | 14,388,240 | 244,276 | 124,503 | 204,954 |
| HG01783 | 14,489,057 | 238,306 | 122,992 | 200,926 |
| HG01781 | 14,484,633 | 238,805 | 123,730 | 203,658 |
| HG01786 | 14,412,349 | 234,946 | 119,583 | 197,528 |
| HG01784 | 14,402,354 | 238,335 | 122,043 | 200,061 |
| HG01785 | 14,493,385 | 236,589 | 121,966 | 200,134 |
| HG01789 | 14,510,012 | 233,319 | 117,997 | 194,747 |
| NA21106 | 14,400,360 | 239,208 | 121,712 | 201,220 |
| NA21107 | 14,499,359 | 236,753 | 119,647 | 198,563 |
| NA21104 | 14,497,159 | 237,256 | 120,387 | 198,985 |
| NA21105 | 14,496,762 | 238,213 | 120,652 | 199,515 |
| NA21102 | 14,395,399 | 241,917 | 123,174 | 202,240 |
| NA21103 | 14,396,123 | 240,790 | 123,726 | 201,958 |
| NA21100 | 14,475,390 | 243,985 | 125,601 | 205,654 |
| NA21101 | 14,396,162 | 240,700 | 123,342 | 202,152 |
| NA21108 | 14,403,795 | 237,995 | 121,642 | 199,940 |
| NA21109 | 14,479,480 | 240,863 | 125,495 | 204,946 |
| HG03313 | 14,420,666 | 266,170 | 134,135 | 228,835 |
| NA19719 | 14,393,898 | 241,901 | 122,365 | 203,251 |
| HG03311 | 14,417,668 | 268,283 | 134,068 | 229,118 |
| NA19711 | 14,422,778 | 266,255 | 132,732 | 228,030 |
| NA19712 | 14,299,181 | 274,872 | 140,031 | 238,300 |
| NA19713 | 14,309,371 | 270,962 | 138,635 | 234,069 |
| NA19716 | 14,400,208 | 239,829 | 122,081 | 201,981 |
| NA19717 | 14,497,572 | 238,269 | 120,353 | 198,857 |
| HG03697 | 14,497,776 | 236,916 | 120,764 | 199,387 |
| HG00565 | 14,489,825 | 238,005 | 123,405 | 201,948 |
| HG00566 | 14,411,653 | 234,850 | 121,380 | 196,896 |
| HG00560 | 14,411,577 | 234,988 | 120,680 | 197,970 |
| HG00766 | 14,408,325 | 236,254 | 120,240 | 198,462 |
| NA19378 | 14,289,466 | 278,038 | 142,569 | 242,448 |
| NA19379 | 14,288,602 | 278,288 | 142,800 | 241,930 |
| NA12760 | 14,508,894 | 233,546 | 118,495 | 195,133 |
| NA12761 | 14,407,872 | 236,524 | 121,613 | 199,776 |
| NA12762 | 14,505,677 | 234,604 | 119,293 | 196,060 |
| NA12763 | 14,368,769 | 236,409 | 122,338 | 237,851 |
| NA19376 | 14,393,094 | 274,395 | 139,539 | 238,418 |
| NA19377 | 14,294,472 | 276,161 | 140,777 | 240,755 |
| NA19374 | 14,416,018 | 269,116 | 134,845 | 229,867 |
| NA19375 | 14,417,741 | 268,568 | 133,893 | 229,426 |
| NA19004 | 14,505,086 | 235,752 | 119,053 | 195,995 |
| NA19005 | 14,505,012 | 234,360 | 118,950 | 196,353 |
| NA18539 | 14,411,160 | 235,831 | 120,364 | 197,357 |
| NA19007 | 14,489,175 | 237,705 | 122,907 | 201,669 |
| NA19000 | 14,502,127 | 235,731 | 119,823 | 196,332 |
| NA19001 | 14,405,497 | 237,583 | 120,810 | 199,173 |
| NA19002 | 14,410,358 | 236,261 | 120,190 | 196,393 |
| NA19003 | 14,412,467 | 235,501 | 120,301 | 197,608 |
| NA18533 | 14,406,763 | 236,891 | 120,410 | 198,736 |
| NA18532 | 14,406,626 | 237,147 | 120,816 | 198,800 |
| NA18531 | 14,401,913 | 238,768 | 122,720 | 200,341 |
| NA18530 | 14,509,012 | 233,531 | 118,152 | 195,493 |
| NA18537 | 14,408,881 | 236,560 | 120,867 | 197,900 |
| NA19009 | 14,507,404 | 233,398 | 118,334 | 195,984 |



|         |            |         |         |         |
|---------|------------|---------|---------|---------|
| NA18535 | 14,408,089 | 235,752 | 121,144 | 197,971 |
| NA18534 | 14,505,246 | 233,976 | 119,090 | 195,746 |
| NA19394 | 14,415,840 | 268,748 | 134,496 | 229,115 |
| NA19395 | 14,290,312 | 278,631 | 142,381 | 241,524 |
| NA19397 | 14,397,660 | 273,069 | 138,496 | 235,455 |
| NA19390 | 14,290,094 | 277,961 | 141,505 | 241,524 |
| NA19391 | 14,291,605 | 278,126 | 141,896 | 241,414 |
| HG03229 | 14,404,039 | 237,076 | 121,272 | 201,147 |
| HG03228 | 14,497,739 | 236,961 | 121,378 | 198,841 |
| HG03225 | 14,396,748 | 273,904 | 138,328 | 237,373 |
| HG03224 | 14,390,611 | 274,191 | 139,508 | 238,594 |
| NA19399 | 14,288,419 | 280,245 | 141,703 | 241,507 |
| HG02318 | 14,299,198 | 274,148 | 140,019 | 238,614 |
| HG02312 | 14,403,611 | 238,402 | 122,138 | 199,516 |
| HG02314 | 14,415,021 | 268,935 | 134,965 | 230,241 |
| HG02315 | 14,297,877 | 274,546 | 140,529 | 238,622 |
| HG02317 | 14,417,031 | 267,495 | 134,268 | 229,559 |
| HG01369 | 14,389,738 | 243,484 | 124,231 | 204,638 |
| NA18629 | 14,508,832 | 233,589 | 117,820 | 195,494 |
| NA18628 | 14,408,333 | 236,724 | 120,168 | 197,953 |
| HG01360 | 14,391,067 | 243,223 | 124,563 | 203,278 |
| NA18626 | 14,405,097 | 237,902 | 121,731 | 199,258 |
| NA18625 | 14,412,212 | 235,188 | 119,554 | 197,133 |
| HG01363 | 14,384,380 | 244,920 | 124,613 | 207,526 |
| NA18623 | 14,483,487 | 240,666 | 123,136 | 203,041 |
| NA18622 | 14,502,195 | 235,994 | 119,481 | 196,891 |
| HG01366 | 14,379,064 | 246,496 | 126,017 | 208,695 |
| NA18620 | 14,507,518 | 234,304 | 118,233 | 195,351 |
| HG03139 | 14,393,430 | 274,321 | 139,123 | 237,590 |
| HG02407 | 14,502,321 | 235,992 | 118,308 | 196,878 |
| HG02401 | 14,488,439 | 238,479 | 122,329 | 202,213 |
| HG02402 | 14,505,630 | 234,170 | 119,342 | 195,902 |
| HG03133 | 14,411,982 | 270,646 | 136,565 | 231,463 |
| HG03132 | 14,287,519 | 279,148 | 143,606 | 242,131 |
| HG03130 | 14,420,048 | 266,528 | 134,168 | 228,966 |
| HG02408 | 14,503,904 | 236,038 | 120,353 | 196,481 |
| HG03136 | 14,406,568 | 271,796 | 136,760 | 233,307 |
| HG03135 | 14,247,003 | 278,245 | 144,861 | 281,825 |
| HG01312 | 14,387,321 | 243,879 | 124,480 | 205,810 |
| HG01812 | 14,411,277 | 235,579 | 119,866 | 197,651 |
| HG01813 | 14,408,906 | 236,631 | 120,388 | 198,513 |
| HG01810 | 14,503,878 | 235,769 | 119,447 | 196,318 |
| HG01811 | 14,510,695 | 233,375 | 117,726 | 194,113 |
| HG01816 | 14,526,835 | 225,969 | 114,901 | 189,495 |
| HG01817 | 14,406,579 | 237,261 | 120,337 | 198,682 |
| HG01815 | 14,407,635 | 236,531 | 121,140 | 198,430 |
| NA20885 | 14,499,579 | 237,244 | 119,900 | 198,847 |
| HG02549 | 14,294,295 | 276,731 | 140,805 | 240,800 |
| HG03046 | 14,286,267 | 277,595 | 145,513 | 242,301 |
| HG03045 | 14,411,569 | 270,970 | 136,071 | 231,906 |
| HG03040 | 14,288,887 | 278,330 | 143,576 | 242,522 |
| HG02541 | 14,403,946 | 270,495 | 137,563 | 234,571 |
| HG02545 | 14,418,477 | 268,075 | 133,326 | 229,244 |
| HG03049 | 14,289,430 | 278,053 | 144,091 | 242,077 |
| HG02546 | 14,300,384 | 274,053 | 139,421 | 238,057 |
| HG01765 | 14,508,092 | 232,739 | 118,510 | 195,830 |
| HG02891 | 14,299,161 | 274,498 | 139,842 | 239,437 |
| HG02890 | 14,429,800 | 265,064 | 131,572 | 225,594 |
| HG02896 | 14,307,773 | 272,765 | 139,017 | 236,723 |
| HG02895 | 14,402,226 | 270,767 | 137,050 | 235,228 |
| HG03547 | 14,389,911 | 275,689 | 139,886 | 239,251 |
| HG01961 | 14,523,187 | 227,095 | 115,666 | 190,065 |
| HG01967 | 14,478,246 | 241,670 | 126,539 | 204,392 |
| HG01965 | 14,386,083 | 243,495 | 125,546 | 206,491 |
| HG01968 | 14,411,988 | 235,547 | 120,813 | 195,838 |
| HG03812 | 14,496,000 | 237,928 | 121,751 | 199,242 |
| HG03436 | 14,415,714 | 268,376 | 134,544 | 230,087 |
| HG03437 | 14,293,514 | 277,388 | 140,826 | 239,749 |
| HG03432 | 14,395,029 | 273,330 | 138,505 | 237,165 |

|         |            |         |         |         |
|---------|------------|---------|---------|---------|
| HG03433 | 14,399,365 | 272,963 | 138,631 | 235,701 |
| HG03814 | 14,397,271 | 239,691 | 122,272 | 202,087 |
| HG03439 | 14,410,855 | 270,872 | 135,118 | 232,748 |
| HG03947 | 14,403,018 | 238,423 | 121,322 | 201,123 |
| HG00369 | 14,485,042 | 239,217 | 124,646 | 202,698 |
| HG03945 | 14,403,583 | 238,645 | 120,904 | 200,914 |
| HG03943 | 14,493,991 | 239,122 | 121,827 | 200,595 |
| HG03940 | 14,395,116 | 241,045 | 123,524 | 202,634 |
| HG03941 | 14,481,494 | 240,371 | 124,545 | 204,836 |
| HG00362 | 14,407,205 | 236,535 | 122,698 | 198,886 |
| HG00361 | 14,391,050 | 230,055 | 117,226 | 230,459 |
| HG00360 | 14,482,119 | 240,079 | 125,243 | 203,747 |
| HG00367 | 14,412,587 | 234,580 | 120,274 | 197,147 |
| HG00366 | 14,510,473 | 232,993 | 118,589 | 194,477 |
| HG00365 | 14,403,180 | 238,049 | 122,457 | 199,533 |
| HG00364 | 14,407,075 | 236,752 | 122,044 | 199,650 |
| NA11831 | 14,519,035 | 229,766 | 116,335 | 192,340 |
| NA11830 | 14,415,979 | 233,658 | 119,501 | 196,294 |
| NA11832 | 14,408,061 | 236,869 | 120,714 | 198,537 |
| NA19729 | 14,512,438 | 231,794 | 118,398 | 192,215 |
| NA20516 | 14,508,962 | 231,854 | 118,814 | 195,792 |
| HG04018 | 14,397,094 | 238,770 | 123,502 | 202,429 |
| NA20514 | 14,404,969 | 236,484 | 123,083 | 201,050 |
| NA20515 | 14,507,586 | 232,765 | 118,950 | 194,665 |
| NA20512 | 14,509,100 | 232,995 | 117,755 | 195,573 |
| NA20513 | 14,505,515 | 235,661 | 119,375 | 196,322 |
| NA20510 | 14,503,565 | 235,641 | 119,337 | 196,387 |
| NA20511 | 14,509,831 | 233,110 | 118,163 | 195,112 |
| HG01566 | 14,403,229 | 238,244 | 121,256 | 199,440 |
| HG01565 | 14,507,098 | 233,900 | 119,952 | 195,908 |
| HG04015 | 14,497,779 | 236,764 | 121,350 | 199,237 |
| HG04014 | 14,399,934 | 239,346 | 122,196 | 201,956 |
| HG04017 | 14,502,443 | 235,504 | 120,067 | 198,233 |
| NA20519 | 14,510,951 | 232,157 | 118,489 | 195,415 |
| NA20778 | 14,505,290 | 234,714 | 119,558 | 196,679 |
| NA20774 | 14,412,125 | 234,444 | 120,521 | 197,994 |
| NA20775 | 14,410,696 | 235,412 | 120,252 | 197,463 |
| NA20772 | 14,408,260 | 236,297 | 120,324 | 198,290 |
| NA20773 | 14,408,426 | 236,448 | 120,562 | 197,536 |
| NA20770 | 14,509,156 | 233,010 | 117,921 | 195,494 |
| NA20771 | 14,410,794 | 235,934 | 119,386 | 197,296 |
| NA20289 | 14,297,647 | 274,665 | 142,093 | 238,825 |
| NA20287 | 14,301,417 | 273,679 | 140,196 | 236,706 |
| NA20282 | 14,304,209 | 272,600 | 140,672 | 235,573 |
| NA20281 | 14,417,680 | 267,995 | 134,729 | 228,268 |
| HG00158 | 14,410,194 | 235,456 | 120,282 | 197,968 |
| HG00159 | 14,509,085 | 233,111 | 118,592 | 194,396 |
| HG00154 | 14,414,023 | 234,605 | 119,932 | 196,081 |
| HG00155 | 14,510,483 | 232,006 | 117,994 | 194,918 |
| HG00157 | 14,502,785 | 234,378 | 120,315 | 198,188 |
| HG00150 | 14,406,720 | 236,384 | 121,287 | 199,081 |
| HG00151 | 14,511,991 | 232,038 | 118,019 | 194,317 |
| NA20351 | 14,413,981 | 266,801 | 135,595 | 230,588 |
| NA20355 | 14,302,827 | 273,162 | 139,538 | 236,344 |
| NA20356 | 14,418,439 | 267,761 | 133,989 | 228,873 |
| NA20357 | 14,287,837 | 278,370 | 143,435 | 242,602 |
| NA20359 | 14,309,047 | 271,348 | 140,237 | 234,290 |
| NA19149 | 14,298,814 | 274,285 | 140,199 | 239,311 |
| NA19141 | 14,399,079 | 272,387 | 138,777 | 235,919 |
| HG02144 | 14,295,847 | 275,219 | 141,173 | 240,543 |
| NA19143 | 14,291,949 | 276,823 | 142,077 | 240,704 |
| HG02146 | 14,521,716 | 227,178 | 116,235 | 190,882 |
| HG02141 | 14,507,900 | 233,350 | 118,460 | 196,014 |
| HG02140 | 14,407,809 | 237,048 | 120,055 | 198,151 |
| HG02143 | 14,408,677 | 269,685 | 136,915 | 231,673 |
| NA19146 | 14,396,710 | 272,128 | 139,336 | 236,967 |
| HG01174 | 14,398,569 | 240,148 | 122,756 | 201,776 |
| HG01177 | 14,393,914 | 240,865 | 123,230 | 204,769 |
| HG01176 | 14,487,734 | 242,178 | 122,476 | 202,756 |

|         |            |         |         |         |
|---------|------------|---------|---------|---------|
| HG01171 | 14,369,925 | 249,211 | 127,564 | 210,982 |
| HG01170 | 14,486,486 | 241,684 | 122,213 | 203,533 |
| HG01173 | 14,480,372 | 241,582 | 124,535 | 204,751 |
| HG01779 | 14,410,126 | 235,702 | 120,547 | 198,248 |
| HG01777 | 14,505,706 | 234,804 | 119,247 | 196,646 |
| HG01776 | 14,413,436 | 234,738 | 118,855 | 196,734 |
| HG01775 | 14,512,100 | 232,335 | 117,276 | 194,942 |
| HG01773 | 14,410,591 | 235,716 | 120,387 | 198,521 |
| HG01771 | 14,502,983 | 236,098 | 120,294 | 197,016 |
| HG01770 | 14,409,039 | 236,276 | 120,687 | 197,018 |
| NA12283 | 14,402,307 | 237,938 | 122,853 | 200,380 |
| NA12282 | 14,503,561 | 235,670 | 120,033 | 196,877 |
| NA12287 | 14,412,463 | 235,236 | 119,961 | 196,574 |
| NA12286 | 14,483,015 | 240,316 | 124,666 | 203,766 |
| HG03300 | 14,261,502 | 273,521 | 140,331 | 276,864 |
| HG03301 | 14,414,572 | 270,005 | 134,288 | 229,490 |
| HG03303 | 14,291,340 | 276,702 | 142,155 | 241,001 |
| HG03304 | 14,395,238 | 273,785 | 139,538 | 237,550 |
| NA12751 | 14,407,018 | 236,850 | 122,829 | 199,720 |
| NA12750 | 14,499,317 | 236,393 | 121,498 | 198,166 |
| HG02090 | 14,494,037 | 238,442 | 121,159 | 201,352 |
| HG04141 | 14,396,666 | 240,392 | 122,987 | 201,722 |
| HG02095 | 14,294,689 | 277,177 | 141,489 | 240,506 |
| HG00139 | 14,505,225 | 233,821 | 119,940 | 196,082 |
| HG01682 | 14,506,214 | 233,498 | 119,240 | 196,144 |
| HG01680 | 14,490,714 | 237,760 | 122,046 | 200,829 |
| HG01686 | 14,509,985 | 233,189 | 117,955 | 194,300 |
| HG01685 | 14,403,109 | 237,793 | 122,107 | 200,167 |
| HG01684 | 14,406,614 | 237,490 | 121,042 | 198,147 |
| NA19031 | 14,414,842 | 269,480 | 134,107 | 229,719 |
| NA19030 | 14,290,153 | 277,628 | 143,907 | 242,340 |
| NA12749 | 14,410,003 | 235,434 | 120,186 | 198,127 |
| NA19035 | 14,417,520 | 268,361 | 134,288 | 229,631 |
| NA19037 | 14,294,946 | 276,596 | 140,206 | 240,128 |
| NA19036 | 14,293,201 | 276,555 | 141,735 | 239,748 |
| NA18520 | 14,298,410 | 274,782 | 140,768 | 238,698 |
| NA19038 | 14,289,269 | 278,332 | 141,661 | 240,822 |
| NA18522 | 14,417,695 | 268,727 | 133,395 | 228,527 |
| NA18523 | 14,294,049 | 276,361 | 142,597 | 241,168 |
| NA18525 | 14,410,865 | 235,948 | 119,715 | 196,935 |
| NA18526 | 14,410,649 | 235,590 | 119,926 | 198,558 |
| HG02325 | 14,298,766 | 275,010 | 139,309 | 238,353 |
| HG03238 | 14,397,944 | 240,667 | 122,367 | 201,652 |
| HG02086 | 14,409,337 | 235,634 | 120,665 | 198,227 |
| HG02323 | 14,425,451 | 265,255 | 132,362 | 228,144 |
| HG02322 | 14,300,856 | 272,902 | 140,788 | 238,082 |
| HG03234 | 14,499,713 | 236,721 | 119,813 | 198,963 |
| HG03235 | 14,396,597 | 240,835 | 122,444 | 201,362 |
| HG03237 | 14,500,068 | 236,055 | 120,092 | 198,636 |
| HG01878 | 14,393,180 | 242,197 | 124,675 | 201,670 |
| HG01354 | 14,406,010 | 237,015 | 121,263 | 198,292 |
| HG01357 | 14,403,378 | 238,658 | 122,263 | 199,521 |
| HG01356 | 14,492,634 | 240,107 | 121,853 | 200,735 |
| HG01351 | 14,405,013 | 237,724 | 121,849 | 199,339 |
| HG01350 | 14,499,421 | 237,043 | 119,765 | 198,512 |
| HG01353 | 14,495,139 | 238,202 | 121,044 | 199,118 |
| HG01699 | 14,506,785 | 233,412 | 118,287 | 196,046 |
| HG01359 | 14,499,262 | 237,143 | 120,054 | 198,571 |
| NA19725 | 14,395,724 | 241,167 | 123,600 | 202,561 |
| NA19726 | 14,497,738 | 238,114 | 120,671 | 198,295 |
| NA18638 | 14,505,747 | 234,486 | 119,329 | 196,289 |
| NA19720 | 14,494,735 | 238,596 | 121,393 | 199,909 |
| NA19723 | 14,473,516 | 244,693 | 126,306 | 205,976 |
| NA19722 | 14,399,242 | 239,897 | 122,082 | 201,898 |
| NA18634 | 14,406,415 | 236,144 | 121,699 | 199,315 |
| NA18635 | 14,504,875 | 234,612 | 119,475 | 197,022 |
| NA18636 | 14,482,942 | 240,795 | 123,728 | 203,650 |
| NA18637 | 14,502,962 | 235,714 | 119,410 | 196,868 |
| NA18630 | 14,413,989 | 234,097 | 119,949 | 196,689 |

|         |            |         |         |         |
|---------|------------|---------|---------|---------|
| NA18631 | 14,408,813 | 235,606 | 120,007 | 197,841 |
| NA18632 | 14,501,192 | 236,469 | 120,237 | 197,818 |
| NA18633 | 14,502,400 | 236,002 | 119,120 | 196,658 |
| HG03129 | 14,294,861 | 275,819 | 142,228 | 239,774 |
| HG02433 | 14,425,960 | 265,742 | 132,641 | 227,316 |
| NA19256 | 14,417,612 | 267,777 | 133,902 | 229,418 |
| HG02439 | 14,418,468 | 267,414 | 134,822 | 229,511 |
| NA19922 | 14,425,819 | 264,606 | 133,594 | 225,664 |
| NA19921 | 14,311,274 | 270,259 | 138,681 | 233,552 |
| NA19920 | 14,414,837 | 268,710 | 134,967 | 230,868 |
| HG03124 | 14,407,304 | 273,137 | 136,471 | 233,285 |
| HG03126 | 14,292,445 | 277,092 | 141,961 | 241,632 |
| HG03127 | 14,413,843 | 269,525 | 133,951 | 231,238 |
| HG01578 | 14,405,331 | 237,420 | 121,149 | 198,948 |
| NA19159 | 14,291,961 | 276,796 | 142,092 | 241,296 |
| HG02557 | 14,415,600 | 269,344 | 134,548 | 229,288 |
| HG02554 | 14,400,154 | 271,542 | 137,627 | 235,094 |
| HG02555 | 14,289,182 | 278,572 | 142,582 | 240,998 |
| HG02558 | 14,297,069 | 274,728 | 140,534 | 238,488 |
| HG03054 | 14,406,972 | 272,591 | 135,325 | 232,714 |
| HG03055 | 14,285,736 | 279,159 | 142,418 | 243,832 |
| HG03057 | 14,403,973 | 273,175 | 137,681 | 233,538 |
| HG03052 | 14,278,780 | 282,130 | 145,581 | 246,422 |
| HG03058 | 14,277,208 | 282,361 | 147,055 | 246,583 |
| HG02881 | 14,415,992 | 268,029 | 135,076 | 229,712 |
| HG02882 | 14,293,587 | 276,775 | 141,362 | 240,147 |
| HG02884 | 14,418,739 | 267,983 | 133,434 | 229,445 |
| HG02885 | 14,298,950 | 274,412 | 140,400 | 239,562 |
| HG00978 | 14,411,343 | 235,258 | 119,273 | 197,976 |
| HG02887 | 14,398,965 | 272,653 | 138,440 | 235,727 |
| HG02888 | 14,296,340 | 276,303 | 141,159 | 239,548 |
| NA18858 | 14,294,949 | 275,787 | 140,906 | 239,724 |
| HG02332 | 14,419,426 | 267,532 | 133,780 | 228,838 |
| NA18853 | 14,414,336 | 269,717 | 135,729 | 230,865 |
| NA18856 | 14,378,956 | 267,878 | 134,055 | 268,882 |
| NA20760 | 14,409,228 | 235,408 | 121,212 | 197,595 |
| HG01997 | 14,416,624 | 232,840 | 119,882 | 194,616 |
| HG01992 | 14,411,826 | 234,539 | 120,624 | 196,354 |
| HG01991 | 14,485,973 | 239,014 | 123,987 | 201,703 |
| HG01990 | 14,418,500 | 267,673 | 133,728 | 230,063 |
| HG03442 | 14,391,034 | 274,685 | 139,973 | 238,815 |
| HG03446 | 14,291,050 | 277,176 | 141,701 | 241,716 |
| HG03445 | 14,405,808 | 271,830 | 136,204 | 233,586 |
| HG03449 | 14,292,067 | 276,759 | 142,350 | 241,411 |
| HG03685 | 14,503,034 | 237,082 | 119,832 | 197,705 |
| HG03684 | 14,387,409 | 243,651 | 126,124 | 204,240 |
| HG03931 | 14,398,863 | 239,415 | 122,360 | 201,668 |
| HG03686 | 14,498,338 | 236,854 | 119,925 | 199,132 |
| HG03937 | 14,402,703 | 238,395 | 122,040 | 201,111 |
| HG03680 | 14,496,606 | 239,113 | 121,227 | 198,963 |
| HG03934 | 14,397,379 | 240,065 | 122,243 | 202,958 |
| HG00371 | 14,488,645 | 237,572 | 123,862 | 202,073 |
| HG00372 | 14,511,379 | 232,445 | 118,898 | 194,144 |
| HG00373 | 14,411,102 | 235,094 | 120,646 | 196,945 |
| HG03689 | 14,400,680 | 238,713 | 121,504 | 200,769 |
| HG00375 | 14,507,865 | 234,275 | 119,268 | 195,047 |
| HG00376 | 14,410,898 | 235,973 | 120,019 | 197,637 |
| HG01139 | 14,478,513 | 244,259 | 124,256 | 206,725 |
| HG02837 | 14,306,071 | 271,599 | 139,186 | 236,019 |
| NA10847 | 14,403,729 | 237,586 | 123,265 | 200,484 |
| HG04006 | 14,492,861 | 239,326 | 122,286 | 200,797 |
| HG04002 | 14,499,994 | 236,447 | 120,344 | 198,295 |
| HG04003 | 14,499,570 | 236,877 | 119,928 | 198,847 |
| NA11829 | 14,487,818 | 238,050 | 123,661 | 202,535 |
| NA06985 | 14,404,299 | 238,506 | 121,782 | 198,930 |
| NA06984 | 14,510,601 | 232,279 | 118,459 | 195,365 |
| NA06986 | 14,490,122 | 238,090 | 123,394 | 201,265 |
| HG01519 | 14,414,038 | 234,255 | 120,079 | 197,189 |
| HG01518 | 14,509,967 | 232,754 | 118,697 | 194,350 |

|         |            |         |         |         |
|---------|------------|---------|---------|---------|
| HG01513 | 14,412,727 | 234,924 | 120,212 | 196,050 |
| HG01512 | 14,510,777 | 231,768 | 118,329 | 194,777 |
| HG01510 | 14,409,664 | 235,873 | 121,106 | 198,436 |
| HG01516 | 14,414,483 | 234,072 | 120,360 | 195,943 |
| HG01515 | 14,506,551 | 233,906 | 119,318 | 195,375 |
| HG03593 | 14,496,091 | 238,164 | 120,771 | 200,515 |
| HG03595 | 14,397,768 | 239,678 | 122,862 | 202,809 |
| HG03594 | 14,496,078 | 237,702 | 120,704 | 199,353 |
| HG03849 | 14,389,671 | 242,757 | 125,554 | 205,208 |
| HG03848 | 14,495,623 | 238,261 | 120,922 | 199,773 |
| HG03846 | 14,494,468 | 238,320 | 121,657 | 200,053 |
| HG03844 | 14,495,888 | 237,816 | 122,310 | 199,795 |
| NA07051 | 14,499,531 | 233,980 | 120,657 | 198,568 |
| NA18609 | 14,500,831 | 234,037 | 121,143 | 197,919 |
| HG00160 | 14,495,096 | 235,182 | 121,820 | 200,011 |
| NA19731 | 14,418,303 | 232,798 | 119,808 | 193,237 |
| NA20362 | 14,402,443 | 271,925 | 139,052 | 234,267 |
| HG01182 | 14,467,670 | 246,659 | 126,626 | 209,730 |
| HG02152 | 14,411,689 | 235,522 | 119,638 | 196,899 |
| HG02153 | 14,411,918 | 234,890 | 120,170 | 197,069 |
| HG02150 | 14,521,764 | 227,687 | 116,083 | 190,404 |
| HG02151 | 14,407,360 | 237,838 | 119,933 | 198,453 |
| HG02156 | 14,411,344 | 235,187 | 120,190 | 197,558 |
| HG02154 | 14,415,771 | 233,788 | 119,070 | 196,096 |
| HG02155 | 14,409,920 | 236,066 | 120,330 | 197,861 |
| HG01168 | 14,405,762 | 237,370 | 121,042 | 198,928 |
| HG01162 | 14,391,875 | 243,158 | 123,780 | 203,820 |
| HG01161 | 14,463,789 | 247,920 | 127,791 | 210,260 |
| HG01167 | 14,451,140 | 252,284 | 129,628 | 214,720 |
| HG01164 | 14,492,488 | 240,509 | 120,687 | 201,057 |
| HG01768 | 14,366,038 | 237,256 | 121,585 | 237,738 |
| NA18605 | 14,501,193 | 236,258 | 119,569 | 196,584 |
| HG01766 | 14,406,105 | 237,060 | 121,196 | 200,243 |
| HG01767 | 14,488,797 | 239,141 | 122,486 | 201,773 |
| HG01761 | 14,499,096 | 237,450 | 121,536 | 198,492 |
| HG01762 | 14,398,296 | 239,285 | 123,926 | 199,838 |
| HG03575 | 14,293,167 | 275,884 | 141,402 | 241,163 |
| HG02088 | 14,490,151 | 237,188 | 122,138 | 201,693 |
| HG02089 | 14,407,544 | 237,030 | 121,148 | 198,423 |
| HG00589 | 14,512,258 | 231,844 | 117,778 | 194,775 |
| HG02081 | 14,410,378 | 235,738 | 119,719 | 198,281 |
| HG02082 | 14,505,839 | 233,635 | 118,866 | 195,605 |
| HG00584 | 14,412,960 | 234,980 | 119,043 | 196,650 |
| HG00583 | 14,509,027 | 232,878 | 118,577 | 195,334 |
| HG02085 | 14,512,036 | 232,970 | 117,112 | 194,021 |
| HG00581 | 14,410,945 | 234,721 | 120,701 | 197,722 |
| HG00580 | 14,502,408 | 234,995 | 120,531 | 196,465 |
| HG00740 | 14,391,079 | 243,353 | 123,115 | 204,965 |
| HG00743 | 14,391,804 | 242,312 | 124,184 | 203,915 |
| HG00742 | 14,494,212 | 237,987 | 121,350 | 199,453 |
| NA19152 | 14,282,947 | 280,683 | 144,317 | 244,308 |
| NA19153 | 14,415,114 | 269,176 | 134,490 | 230,384 |
| HG01694 | 14,504,370 | 234,900 | 119,334 | 196,628 |
| HG01695 | 14,405,029 | 237,453 | 121,466 | 199,312 |
| HG01697 | 14,409,236 | 236,542 | 120,242 | 198,067 |
| NA19028 | 14,416,132 | 268,551 | 134,393 | 230,296 |
| NA19026 | 14,410,738 | 271,095 | 136,244 | 230,918 |
| NA19027 | 14,418,960 | 267,725 | 133,755 | 229,500 |
| NA19024 | 14,286,960 | 279,333 | 143,662 | 242,933 |
| NA19025 | 14,417,781 | 268,133 | 133,272 | 229,342 |
| NA19023 | 14,282,169 | 280,130 | 144,480 | 244,996 |
| NA19020 | 14,391,092 | 274,318 | 139,914 | 238,968 |
| HG03209 | 14,393,967 | 274,688 | 138,885 | 237,322 |
| HG02330 | 14,415,602 | 266,955 | 135,060 | 230,254 |
| HG02337 | 14,297,776 | 274,270 | 141,856 | 239,101 |
| HG02334 | 14,428,084 | 263,603 | 132,177 | 225,531 |
| HG02339 | 14,300,992 | 274,221 | 140,146 | 238,634 |
| HG01342 | 14,336,625 | 261,300 | 134,887 | 223,233 |
| HG01341 | 14,500,291 | 237,502 | 119,566 | 197,944 |

|         |            |         |         |         |
|---------|------------|---------|---------|---------|
| HG01344 | 14,500,345 | 236,327 | 120,135 | 198,357 |
| HG01345 | 14,397,007 | 240,540 | 122,264 | 202,998 |
| HG01348 | 14,405,593 | 237,324 | 121,226 | 198,789 |
| NA19732 | 14,520,093 | 228,521 | 117,110 | 190,768 |
| NA18608 | 14,504,493 | 235,177 | 118,830 | 196,730 |
| HG01187 | 14,482,048 | 242,739 | 123,566 | 205,026 |
| NA19734 | 14,408,105 | 236,210 | 121,132 | 198,302 |
| HG01183 | 14,387,357 | 244,147 | 124,560 | 205,486 |
| NA18603 | 14,497,360 | 236,244 | 120,545 | 198,467 |
| NA18602 | 14,410,356 | 235,776 | 120,639 | 197,674 |
| HG01188 | 14,361,749 | 254,301 | 128,887 | 214,261 |
| NA18606 | 14,511,466 | 233,081 | 117,488 | 194,428 |
| HG03115 | 14,406,025 | 273,055 | 137,861 | 232,676 |
| HG03114 | 14,284,846 | 278,733 | 144,225 | 242,718 |
| HG03117 | 14,288,138 | 278,266 | 142,364 | 242,512 |
| HG03111 | 14,292,505 | 277,244 | 140,717 | 240,248 |
| HG03112 | 14,394,507 | 273,729 | 139,396 | 237,312 |
| HG03673 | 14,387,163 | 244,034 | 126,330 | 205,214 |
| HG03118 | 14,396,271 | 273,606 | 138,462 | 236,696 |
| HG02429 | 14,399,223 | 272,136 | 137,532 | 235,755 |
| HG02427 | 14,300,051 | 274,177 | 140,397 | 237,875 |
| HG02425 | 14,387,774 | 242,609 | 126,566 | 206,020 |
| HG01440 | 14,478,093 | 245,218 | 123,938 | 205,592 |
| HG02420 | 14,432,428 | 262,101 | 132,093 | 223,896 |
| NA18517 | 14,296,268 | 274,782 | 141,171 | 240,405 |
| NA18516 | 14,411,930 | 269,577 | 135,547 | 231,028 |
| NA18511 | 14,293,249 | 276,729 | 141,481 | 241,273 |
| NA18510 | 14,394,314 | 273,720 | 139,655 | 237,555 |
| NA19175 | 14,417,097 | 268,064 | 134,503 | 230,467 |
| HG01134 | 14,389,690 | 243,267 | 124,155 | 204,691 |
| NA18519 | 14,409,503 | 270,825 | 136,098 | 231,727 |
| HG01443 | 14,501,855 | 236,276 | 119,579 | 196,420 |
| NA18999 | 14,412,523 | 234,794 | 119,460 | 197,544 |
| NA18998 | 14,371,269 | 235,478 | 120,292 | 236,742 |
| HG02521 | 14,507,110 | 233,444 | 118,844 | 195,737 |
| NA18991 | 14,411,877 | 234,906 | 120,516 | 198,173 |
| NA18990 | 14,505,248 | 233,133 | 119,103 | 196,363 |
| NA18993 | 14,412,415 | 235,680 | 119,100 | 197,522 |
| NA18992 | 14,426,618 | 230,574 | 115,912 | 192,433 |
| NA18995 | 14,492,095 | 236,747 | 122,395 | 200,446 |
| NA18994 | 14,514,426 | 231,475 | 117,520 | 193,446 |
| NA18997 | 14,413,258 | 235,250 | 119,131 | 196,430 |
| HG03061 | 14,295,522 | 276,289 | 139,684 | 240,418 |
| HG03060 | 14,412,297 | 270,151 | 134,664 | 231,341 |
| HG03063 | 14,412,936 | 270,590 | 134,061 | 231,057 |
| HG03064 | 14,286,737 | 277,886 | 143,115 | 244,479 |
| HG03066 | 14,409,627 | 271,145 | 135,596 | 232,847 |
| HG03069 | 14,409,140 | 270,779 | 136,021 | 232,188 |
| NA11920 | 14,404,107 | 238,122 | 121,826 | 200,195 |
| NA18865 | 14,397,136 | 272,278 | 138,536 | 237,679 |
| NA18864 | 14,289,506 | 277,789 | 141,473 | 241,393 |
| NA18867 | 14,294,984 | 276,214 | 141,735 | 240,412 |
| NA18861 | 14,293,565 | 276,705 | 141,147 | 240,937 |
| HG03291 | 14,294,198 | 275,772 | 142,427 | 241,327 |
| NA18868 | 14,408,420 | 271,633 | 136,711 | 232,121 |
| NA19116 | 14,298,559 | 274,454 | 140,693 | 239,571 |
| HG02635 | 14,285,083 | 279,909 | 145,032 | 242,785 |
| HG02634 | 14,410,483 | 271,018 | 136,371 | 232,007 |
| HG00442 | 14,505,048 | 234,731 | 118,534 | 195,437 |
| HG01865 | 14,487,398 | 238,772 | 122,673 | 202,045 |
| HG01988 | 14,422,436 | 262,857 | 134,813 | 225,539 |
| HG01989 | 14,306,088 | 271,346 | 139,286 | 236,689 |
| HG01985 | 14,292,987 | 278,282 | 140,031 | 239,628 |
| HG01986 | 14,419,281 | 267,855 | 133,145 | 227,581 |
| HG01980 | 14,396,962 | 240,632 | 124,249 | 200,694 |
| HG01982 | 14,513,438 | 231,351 | 117,677 | 193,772 |
| HG00345 | 14,510,593 | 233,147 | 118,154 | 194,997 |
| HG03451 | 14,405,322 | 271,754 | 137,409 | 234,575 |
| HG03452 | 14,277,916 | 281,094 | 145,232 | 245,794 |

|         |            |         |         |         |
|---------|------------|---------|---------|---------|
| HG00346 | 14,412,749 | 234,524 | 120,636 | 196,377 |
| HG00341 | 14,504,534 | 234,522 | 119,972 | 196,170 |
| HG03455 | 14,287,212 | 278,674 | 142,246 | 243,547 |
| HG00343 | 14,414,215 | 233,909 | 119,986 | 197,643 |
| HG03457 | 14,406,693 | 271,813 | 136,722 | 232,898 |
| HG03458 | 14,292,437 | 277,192 | 141,761 | 242,246 |
| HG00349 | 14,414,250 | 233,488 | 119,368 | 196,648 |
| HG03692 | 14,392,880 | 242,394 | 124,811 | 202,946 |
| HG03693 | 14,486,338 | 242,209 | 123,594 | 202,193 |
| HG03922 | 14,390,191 | 242,709 | 125,514 | 205,525 |
| HG03691 | 14,499,403 | 236,626 | 120,286 | 198,517 |
| HG03696 | 14,522,557 | 227,468 | 115,848 | 190,182 |
| HG03925 | 14,397,490 | 240,595 | 122,258 | 202,542 |
| HG03926 | 14,495,292 | 238,315 | 121,672 | 200,132 |
| HG03695 | 14,485,228 | 238,735 | 123,417 | 203,825 |
| HG02981 | 14,410,770 | 269,759 | 134,917 | 231,509 |
| HG03698 | 14,401,258 | 238,578 | 121,782 | 201,443 |
| HG02982 | 14,415,002 | 269,223 | 134,504 | 230,472 |
| NA19372 | 14,415,044 | 268,704 | 133,871 | 230,354 |
| NA10851 | 14,494,040 | 236,588 | 121,672 | 200,571 |
| NA06994 | 14,505,819 | 233,942 | 120,076 | 196,670 |
| HG04070 | 14,425,641 | 229,459 | 117,035 | 192,573 |
| HG04076 | 14,396,870 | 240,241 | 123,291 | 202,072 |
| HG04075 | 14,401,723 | 238,222 | 122,363 | 200,746 |
| HG01509 | 14,486,667 | 238,833 | 123,945 | 203,431 |
| HG01500 | 14,506,386 | 234,751 | 118,761 | 196,385 |
| HG01501 | 14,410,440 | 234,588 | 120,744 | 198,376 |
| HG01503 | 14,510,169 | 233,082 | 117,876 | 194,853 |
| HG01504 | 14,407,146 | 236,959 | 121,404 | 198,562 |
| HG01506 | 14,509,615 | 233,531 | 118,388 | 195,225 |
| HG01507 | 14,412,079 | 235,236 | 119,875 | 198,113 |
| HG02855 | 14,297,042 | 275,094 | 141,449 | 239,900 |
| HG02854 | 14,413,546 | 269,763 | 134,492 | 230,442 |
| HG03858 | 14,400,345 | 238,545 | 122,462 | 201,218 |
| HG02852 | 14,299,458 | 274,567 | 139,456 | 238,470 |
| HG02851 | 14,412,878 | 269,545 | 134,993 | 231,567 |
| HG03589 | 14,400,280 | 238,893 | 121,678 | 202,292 |
| HG03854 | 14,504,075 | 235,086 | 118,973 | 197,188 |
| HG03856 | 14,502,758 | 235,332 | 119,045 | 197,813 |
| HG03857 | 14,393,883 | 242,425 | 122,747 | 203,267 |
| HG03850 | 14,502,194 | 235,862 | 119,753 | 197,760 |
| HG03583 | 14,288,523 | 278,151 | 141,849 | 242,614 |
| NA12156 | 14,412,072 | 234,871 | 120,398 | 197,328 |
| NA18949 | 14,411,243 | 235,469 | 120,227 | 197,218 |
| HG00336 | 14,486,921 | 237,951 | 123,690 | 202,378 |
| HG00176 | 14,400,063 | 239,054 | 123,424 | 200,565 |
| HG00177 | 14,412,970 | 233,932 | 121,539 | 196,966 |
| HG00174 | 14,410,564 | 235,711 | 120,579 | 197,830 |
| HG03875 | 14,485,897 | 238,784 | 123,493 | 202,705 |
| HG00173 | 14,410,711 | 235,401 | 121,364 | 198,284 |
| HG00171 | 14,408,165 | 235,924 | 121,892 | 197,459 |
| NA07000 | 14,410,659 | 234,955 | 120,204 | 197,890 |
| HG00178 | 14,409,658 | 235,278 | 121,637 | 197,715 |
| HG00179 | 14,406,892 | 236,365 | 121,810 | 199,014 |
| HG01435 | 14,393,365 | 241,868 | 124,078 | 203,450 |
| HG01437 | 14,504,493 | 234,653 | 119,520 | 196,373 |
| HG01431 | 14,488,638 | 240,551 | 122,364 | 202,773 |
| HG01432 | 14,408,251 | 236,374 | 120,507 | 198,852 |
| HG02522 | 14,404,959 | 238,278 | 121,001 | 199,164 |
| HG04107 | 14,497,978 | 238,035 | 120,738 | 199,000 |
| HG04106 | 14,392,537 | 240,515 | 125,218 | 202,683 |
| HG01438 | 14,416,878 | 233,428 | 119,228 | 195,875 |
| HG04100 | 14,494,343 | 238,468 | 121,312 | 200,663 |
| HG03120 | 14,408,506 | 271,384 | 136,612 | 232,377 |
| HG02084 | 14,409,117 | 236,522 | 119,890 | 198,425 |
| HG02383 | 14,487,228 | 239,004 | 122,863 | 202,337 |
| HG03259 | 14,312,819 | 268,227 | 139,301 | 233,417 |
| HG02386 | 14,449,531 | 237,169 | 123,740 | 240,485 |
| HG02385 | 14,492,271 | 235,711 | 122,664 | 201,226 |

|         |            |         |         |         |
|---------|------------|---------|---------|---------|
| HG02384 | 14,515,665 | 232,586 | 116,051 | 193,633 |
| HG01757 | 14,394,494 | 242,301 | 123,944 | 201,432 |
| HG01756 | 14,492,617 | 239,766 | 122,595 | 199,722 |
| NA19239 | 14,415,178 | 269,033 | 134,086 | 229,743 |
| NA19238 | 14,298,161 | 275,550 | 140,301 | 239,548 |
| NA19236 | 14,410,789 | 270,176 | 136,047 | 231,287 |
| NA19235 | 14,294,380 | 276,635 | 141,213 | 240,442 |
| HG03978 | 14,470,923 | 244,503 | 127,036 | 208,375 |
| HG03977 | 14,396,080 | 240,281 | 122,548 | 202,606 |
| HG03976 | 14,497,725 | 237,325 | 120,682 | 199,318 |
| HG02973 | 14,368,770 | 273,052 | 136,634 | 270,187 |
| HG00598 | 14,485,125 | 239,461 | 124,439 | 203,507 |
| HG00599 | 14,400,338 | 238,794 | 123,777 | 200,620 |
| HG00595 | 14,505,098 | 235,323 | 119,147 | 195,717 |
| HG00596 | 14,414,141 | 234,137 | 120,514 | 196,768 |
| HG00590 | 14,411,248 | 235,671 | 120,570 | 196,942 |
| HG00592 | 14,489,496 | 237,645 | 122,733 | 202,017 |
| HG00593 | 14,407,122 | 237,425 | 121,587 | 198,680 |
| NA19121 | 14,415,715 | 269,058 | 134,728 | 229,909 |
| HG03971 | 14,479,006 | 241,557 | 124,915 | 205,266 |
| HG00759 | 14,405,908 | 237,114 | 120,933 | 198,870 |
| NA19129 | 14,296,025 | 275,214 | 141,333 | 240,306 |
| NA19059 | 14,410,248 | 234,972 | 120,786 | 197,417 |
| NA19058 | 14,510,802 | 233,744 | 117,839 | 194,189 |
| HG03212 | 14,288,584 | 277,661 | 142,149 | 242,352 |
| NA19057 | 14,411,665 | 235,831 | 119,507 | 197,775 |
| NA19056 | 14,511,544 | 232,327 | 117,436 | 194,273 |
| NA19055 | 14,505,736 | 235,209 | 119,026 | 196,380 |
| NA19054 | 14,407,369 | 237,849 | 121,010 | 197,747 |
| NA19835 | 14,298,105 | 275,121 | 140,163 | 238,728 |
| NA19834 | 14,426,304 | 265,417 | 132,259 | 225,406 |
| NA18616 | 14,408,201 | 236,372 | 120,715 | 198,144 |
| NA18617 | 14,408,300 | 236,978 | 120,472 | 197,741 |
| NA18614 | 14,409,052 | 236,782 | 120,094 | 198,452 |
| HG02182 | 14,409,410 | 235,844 | 120,477 | 197,939 |
| NA18612 | 14,503,859 | 234,800 | 119,173 | 196,205 |
| HG02184 | 14,414,449 | 234,344 | 119,878 | 196,145 |
| HG02187 | 14,410,430 | 236,966 | 120,164 | 198,251 |
| HG02186 | 14,416,263 | 233,919 | 118,918 | 196,243 |
| HG02188 | 14,414,919 | 234,437 | 119,393 | 196,314 |
| NA18618 | 14,412,020 | 235,316 | 120,924 | 197,599 |
| NA18619 | 14,411,900 | 234,842 | 120,657 | 197,853 |
| NA21089 | 14,397,735 | 240,768 | 122,713 | 200,899 |
| HG03103 | 14,394,354 | 272,692 | 139,663 | 236,816 |
| HG03100 | 14,391,802 | 274,477 | 140,904 | 237,915 |
| NA19901 | 14,292,325 | 277,410 | 142,062 | 239,653 |
| NA19900 | 14,428,881 | 263,639 | 131,847 | 226,362 |
| HG03105 | 14,292,897 | 277,134 | 141,206 | 240,954 |
| HG03108 | 14,283,636 | 279,234 | 145,866 | 243,805 |
| HG03109 | 14,391,817 | 275,266 | 140,909 | 238,293 |
| NA19909 | 14,307,587 | 272,480 | 137,972 | 235,089 |
| NA19908 | 14,419,998 | 267,046 | 133,761 | 227,632 |
| HG02450 | 14,289,952 | 277,200 | 142,842 | 241,307 |
| HG02455 | 14,422,629 | 266,717 | 133,765 | 226,634 |
| NA18502 | 14,296,469 | 274,960 | 141,401 | 240,005 |
| NA18501 | 14,415,773 | 270,135 | 134,490 | 230,347 |
| NA18507 | 14,412,404 | 269,151 | 135,586 | 231,355 |
| NA18504 | 14,414,361 | 269,907 | 134,009 | 229,793 |
| NA18505 | 14,291,316 | 277,750 | 142,094 | 241,300 |
| HG01242 | 14,323,125 | 265,251 | 137,082 | 229,044 |
| NA18508 | 14,292,571 | 277,808 | 140,769 | 241,817 |
| NA19080 | 14,412,171 | 235,021 | 119,455 | 196,348 |
| HG01247 | 14,480,238 | 244,608 | 122,745 | 205,128 |
| NA18986 | 14,484,023 | 240,672 | 124,410 | 202,910 |
| NA18987 | 14,418,740 | 232,708 | 118,154 | 194,289 |
| NA18984 | 14,512,385 | 232,347 | 117,750 | 193,447 |
| NA18985 | 14,490,455 | 237,078 | 122,150 | 201,636 |
| NA18982 | 14,506,618 | 234,642 | 118,518 | 195,900 |
| NA18983 | 14,502,355 | 235,898 | 119,840 | 196,940 |



|         |            |         |         |         |
|---------|------------|---------|---------|---------|
| NA18980 | 14,409,256 | 236,625 | 120,621 | 198,229 |
| NA18981 | 14,407,941 | 237,604 | 120,345 | 198,472 |
| NA12827 | 14,492,434 | 236,520 | 123,481 | 201,063 |
| NA18988 | 14,501,308 | 237,026 | 120,021 | 196,358 |
| NA18989 | 14,481,853 | 240,525 | 124,877 | 203,538 |
| HG00732 | 14,385,411 | 244,747 | 126,445 | 204,226 |
| HG02536 | 14,422,113 | 266,687 | 133,783 | 227,153 |
| HG02537 | 14,285,417 | 280,429 | 142,700 | 243,226 |
| HG03078 | 14,401,531 | 273,613 | 138,232 | 235,170 |
| HG03079 | 14,288,281 | 277,466 | 143,326 | 243,822 |
| HG03077 | 14,370,625 | 270,788 | 135,297 | 271,065 |
| HG03074 | 14,407,341 | 271,492 | 136,287 | 233,213 |
| HG03072 | 14,412,867 | 270,141 | 134,534 | 231,552 |
| HG03073 | 14,284,875 | 278,820 | 143,264 | 244,884 |
| NA11930 | 14,482,627 | 240,369 | 125,035 | 203,117 |
| NA11931 | 14,412,099 | 234,355 | 120,689 | 197,288 |
| NA11932 | 14,503,002 | 236,032 | 120,433 | 196,736 |
| NA11933 | 14,406,764 | 236,942 | 121,650 | 198,562 |
| NA18873 | 14,292,869 | 275,994 | 142,068 | 241,019 |
| NA18870 | 14,286,956 | 278,503 | 143,908 | 244,407 |
| NA18871 | 14,414,464 | 269,166 | 134,940 | 229,889 |
| NA18876 | 14,294,908 | 276,108 | 140,928 | 240,441 |
| NA18877 | 14,412,187 | 270,001 | 135,260 | 231,280 |
| NA18874 | 14,416,502 | 268,332 | 134,294 | 230,492 |
| NA18878 | 14,293,843 | 276,512 | 141,610 | 240,561 |
| NA18879 | 14,414,566 | 268,611 | 135,064 | 230,940 |
| HG00864 | 14,413,866 | 234,509 | 119,424 | 196,945 |
| HG02628 | 14,408,479 | 272,081 | 136,998 | 231,987 |
| HG02629 | 14,283,366 | 279,434 | 145,467 | 244,615 |
| HG01848 | 14,406,563 | 236,416 | 121,303 | 199,083 |
| HG02624 | 14,284,070 | 279,689 | 145,044 | 242,971 |
| HG02620 | 14,409,705 | 271,657 | 136,394 | 232,121 |
| HG02621 | 14,282,870 | 281,152 | 144,708 | 244,386 |
| HG02623 | 14,410,627 | 271,485 | 136,548 | 231,968 |
| NA20758 | 14,485,762 | 239,276 | 123,455 | 203,842 |
| NA18950 | 14,403,217 | 238,860 | 121,573 | 199,798 |
| HG02974 | 14,283,204 | 280,473 | 145,039 | 243,761 |
| NA19006 | 14,504,557 | 234,958 | 119,039 | 197,430 |
| HG00353 | 14,411,710 | 234,582 | 120,201 | 197,539 |
| HG00350 | 14,417,201 | 233,173 | 118,990 | 196,346 |
| NA18538 | 14,409,217 | 236,772 | 120,754 | 198,067 |
| HG03469 | 14,397,910 | 274,902 | 138,628 | 235,315 |
| HG00357 | 14,414,787 | 233,800 | 120,060 | 196,302 |
| HG00355 | 14,414,983 | 232,668 | 119,948 | 196,501 |
| HG03464 | 14,275,238 | 282,571 | 146,515 | 246,893 |
| HG00358 | 14,494,319 | 234,850 | 121,917 | 200,117 |
| HG03461 | 14,293,291 | 277,074 | 140,920 | 241,649 |
| HG03460 | 14,408,922 | 270,647 | 135,453 | 232,509 |
| HG03919 | 14,397,634 | 240,181 | 122,108 | 202,240 |
| HG03668 | 14,394,502 | 240,734 | 123,805 | 203,559 |
| HG03667 | 14,495,719 | 237,514 | 121,482 | 199,790 |
| HG03914 | 14,482,285 | 240,942 | 123,733 | 203,926 |
| HG03917 | 14,479,019 | 241,067 | 124,758 | 206,020 |
| HG03916 | 14,400,487 | 239,073 | 122,140 | 201,021 |
| HG03663 | 14,493,108 | 239,837 | 121,853 | 201,110 |
| HG03910 | 14,400,845 | 238,450 | 121,822 | 200,952 |
| HG03913 | 14,398,723 | 239,582 | 122,359 | 200,998 |
| HG03600 | 14,494,912 | 238,471 | 120,907 | 200,188 |
| HG01847 | 14,409,312 | 235,507 | 121,447 | 198,002 |
| NA18536 | 14,508,339 | 233,218 | 118,383 | 195,593 |
| HG04060 | 14,493,008 | 238,012 | 122,078 | 199,782 |
| HG04061 | 14,496,971 | 238,295 | 120,678 | 199,163 |
| HG01537 | 14,404,326 | 237,877 | 122,431 | 199,883 |
| HG04063 | 14,402,876 | 238,667 | 121,798 | 200,439 |
| HG01531 | 14,404,932 | 237,525 | 122,475 | 200,307 |
| HG01530 | 14,503,375 | 235,930 | 120,366 | 196,659 |
| NA11840 | 14,407,408 | 236,092 | 121,539 | 198,644 |
| NA11843 | 14,486,503 | 238,220 | 123,393 | 202,150 |
| NA12003 | 14,510,614 | 232,912 | 118,809 | 195,364 |

|         |            |         |         |         |
|---------|------------|---------|---------|---------|
| NA12005 | 14,510,125 | 232,872 | 118,466 | 194,362 |
| NA12004 | 14,407,176 | 235,678 | 121,149 | 199,421 |
| NA12006 | 14,409,065 | 236,171 | 120,914 | 197,823 |
| NA20544 | 14,504,586 | 233,740 | 119,663 | 196,725 |
| NA20541 | 14,409,356 | 235,408 | 120,117 | 197,625 |
| NA20540 | 14,417,479 | 233,285 | 119,199 | 195,579 |
| NA20543 | 14,501,206 | 235,662 | 119,744 | 198,333 |
| NA20542 | 14,408,605 | 236,515 | 120,453 | 199,052 |
| HG03869 | 14,494,439 | 239,102 | 121,814 | 199,892 |
| HG03868 | 14,392,035 | 241,349 | 124,917 | 203,775 |
| HG02840 | 14,298,722 | 274,533 | 141,033 | 239,220 |
| HG03861 | 14,401,419 | 239,177 | 121,815 | 200,492 |
| HG03863 | 14,401,713 | 239,280 | 121,462 | 201,135 |
| HG03862 | 14,408,122 | 235,491 | 122,292 | 199,026 |
| HG03864 | 14,492,716 | 238,612 | 122,723 | 200,812 |
| HG03867 | 14,484,621 | 239,269 | 123,370 | 204,615 |
| HG03866 | 14,504,814 | 235,353 | 118,782 | 197,523 |
| NA19393 | 14,407,113 | 271,335 | 137,181 | 233,060 |
| HG00103 | 14,504,414 | 234,470 | 120,041 | 196,568 |
| NA12347 | 14,507,223 | 233,528 | 119,059 | 195,961 |
| HG00101 | 14,488,080 | 237,357 | 124,938 | 202,803 |
| HG00100 | 14,404,502 | 238,141 | 121,894 | 198,428 |
| HG00107 | 14,492,238 | 236,190 | 123,790 | 200,594 |
| HG00106 | 14,404,344 | 237,065 | 122,547 | 199,473 |
| NA12340 | 14,510,805 | 232,175 | 118,362 | 194,239 |
| NA12341 | 14,408,144 | 236,081 | 122,058 | 198,736 |
| HG00451 | 14,510,766 | 232,653 | 117,676 | 194,702 |
| HG00109 | 14,489,714 | 237,586 | 122,308 | 201,954 |
| HG00108 | 14,509,789 | 232,897 | 118,688 | 194,557 |
| NA12348 | 14,408,752 | 236,084 | 121,714 | 198,348 |
| HG01403 | 14,381,616 | 245,490 | 125,982 | 208,495 |
| HG01402 | 14,481,761 | 243,050 | 123,353 | 204,858 |
| HG04118 | 14,397,347 | 240,518 | 122,424 | 201,967 |
| HG03485 | 14,290,470 | 276,922 | 142,126 | 242,320 |
| HG03484 | 14,408,291 | 271,087 | 135,431 | 232,359 |
| HG02023 | 14,503,698 | 235,500 | 119,426 | 196,779 |
| HG02020 | 14,510,357 | 233,590 | 118,119 | 194,344 |
| HG03488 | 14,400,615 | 238,946 | 121,407 | 202,341 |
| HG02026 | 14,503,078 | 235,823 | 119,831 | 197,313 |
| HG01746 | 14,410,670 | 235,486 | 120,571 | 197,053 |
| HG01747 | 14,488,791 | 237,082 | 123,123 | 202,104 |
| NA20819 | 14,406,331 | 236,031 | 121,204 | 199,043 |
| NA20818 | 14,412,621 | 234,490 | 120,078 | 197,677 |
| NA20815 | 14,507,753 | 233,465 | 118,598 | 196,192 |
| HG02025 | 14,403,528 | 238,215 | 122,276 | 199,910 |
| NA20813 | 14,409,638 | 235,582 | 120,873 | 198,081 |
| NA20812 | 14,487,767 | 237,702 | 122,892 | 202,920 |
| NA20811 | 14,509,376 | 233,582 | 118,122 | 194,883 |
| NA20810 | 14,498,427 | 236,137 | 120,576 | 198,561 |
| HG00619 | 14,508,036 | 233,769 | 118,882 | 194,656 |
| HG00614 | 14,410,601 | 236,003 | 120,028 | 197,463 |
| HG00613 | 14,507,206 | 233,283 | 119,063 | 195,335 |
| HG00611 | 14,409,788 | 236,275 | 121,037 | 197,806 |
| HG00610 | 14,506,775 | 233,607 | 119,042 | 195,622 |
| HG03380 | 14,291,955 | 276,783 | 142,046 | 242,076 |
| NA21142 | 14,400,374 | 238,859 | 121,733 | 200,788 |
| NA21143 | 14,393,222 | 241,531 | 123,357 | 203,525 |
| NA21141 | 14,398,272 | 240,131 | 122,246 | 201,598 |
| NA21144 | 14,398,256 | 239,218 | 122,910 | 202,458 |
| NA19225 | 14,296,671 | 276,233 | 140,143 | 239,630 |
| NA19222 | 14,288,194 | 278,708 | 142,694 | 242,058 |
| NA19223 | 14,415,693 | 268,593 | 134,683 | 230,832 |
| NA19130 | 14,413,379 | 269,008 | 134,735 | 230,512 |
| NA19131 | 14,279,593 | 281,258 | 145,490 | 244,585 |
| HG00729 | 14,399,371 | 239,465 | 123,298 | 200,597 |
| HG00728 | 14,485,291 | 239,790 | 123,792 | 203,476 |
| NA19137 | 14,288,455 | 277,999 | 143,151 | 242,237 |
| NA19138 | 14,412,652 | 270,311 | 135,152 | 230,810 |
| HG01598 | 14,408,369 | 236,105 | 120,442 | 198,586 |

|         |            |         |         |         |
|---------|------------|---------|---------|---------|
| HG03267 | 14,291,534 | 276,948 | 141,631 | 241,492 |
| HG01047 | 14,497,694 | 238,072 | 120,798 | 199,295 |
| HG03265 | 14,415,364 | 269,445 | 134,087 | 230,545 |
| NA19041 | 14,397,106 | 272,602 | 138,486 | 236,088 |
| NA19042 | 14,293,440 | 277,503 | 141,420 | 240,905 |
| HG03268 | 14,397,029 | 272,362 | 138,892 | 237,248 |
| NA18627 | 14,408,507 | 236,642 | 120,785 | 198,155 |
| NA19096 | 14,418,383 | 268,138 | 133,859 | 229,396 |
| HG01362 | 14,461,936 | 246,663 | 127,819 | 212,568 |
| NA18624 | 14,485,872 | 238,616 | 123,790 | 203,254 |
| HG00344 | 14,414,757 | 233,339 | 120,332 | 196,813 |
| HG02190 | 14,408,908 | 236,386 | 120,300 | 198,144 |
| HG01365 | 14,480,757 | 243,291 | 123,805 | 204,931 |
| HG00437 | 14,407,542 | 237,053 | 120,100 | 198,829 |
| HG00436 | 14,491,627 | 236,533 | 122,236 | 201,216 |
| NA18621 | 14,485,423 | 239,685 | 123,333 | 203,191 |
| HG00342 | 14,488,243 | 238,214 | 123,139 | 201,493 |
| NA19913 | 14,299,226 | 274,125 | 140,201 | 236,934 |
| NA19916 | 14,418,634 | 267,552 | 133,918 | 229,321 |
| NA19917 | 14,294,976 | 275,890 | 141,337 | 239,995 |
| NA19914 | 14,307,879 | 271,520 | 138,593 | 234,508 |
| HG02449 | 14,396,993 | 272,270 | 140,062 | 236,348 |
| HG02442 | 14,418,815 | 267,752 | 134,288 | 228,547 |
| HG02445 | 14,426,966 | 264,366 | 133,104 | 226,254 |
| HG01259 | 14,502,130 | 236,138 | 120,153 | 197,787 |
| HG01250 | 14,492,228 | 239,835 | 122,051 | 201,581 |
| HG01251 | 14,395,667 | 240,558 | 123,566 | 202,560 |
| HG01253 | 14,493,338 | 239,214 | 121,929 | 200,918 |
| HG01254 | 14,363,305 | 250,293 | 130,716 | 214,002 |
| HG01256 | 14,497,525 | 237,786 | 121,286 | 198,711 |
| HG01257 | 14,394,381 | 241,135 | 123,987 | 202,516 |
| HG03920 | 14,494,458 | 238,761 | 120,957 | 200,094 |
| HG04216 | 14,393,544 | 241,312 | 123,488 | 203,373 |
| NA12830 | 14,403,056 | 238,779 | 122,362 | 200,139 |
| HG03690 | 14,424,844 | 231,196 | 116,911 | 193,614 |
| HG03189 | 14,288,920 | 278,310 | 142,213 | 241,972 |
| HG02508 | 14,293,701 | 276,279 | 141,509 | 240,641 |
| HG02505 | 14,295,582 | 275,404 | 142,154 | 239,511 |
| HG02501 | 14,426,983 | 265,396 | 132,470 | 225,582 |
| HG02502 | 14,300,378 | 274,191 | 141,207 | 237,016 |
| HG03009 | 14,496,362 | 237,368 | 120,887 | 199,898 |
| HG03694 | 14,494,553 | 237,959 | 121,369 | 200,420 |
| HG00269 | 14,405,728 | 237,755 | 121,963 | 197,717 |
| HG03007 | 14,391,958 | 241,809 | 124,746 | 203,692 |
| HG03006 | 14,472,825 | 243,946 | 126,564 | 207,836 |
| HG03928 | 14,398,856 | 240,394 | 122,021 | 201,421 |
| HG02983 | 14,297,677 | 275,467 | 140,083 | 238,563 |
| HG00290 | 14,484,397 | 239,651 | 125,118 | 203,505 |
| HG00262 | 14,414,697 | 235,096 | 119,011 | 195,680 |
| HG00263 | 14,410,596 | 235,725 | 119,915 | 196,768 |
| HG03517 | 14,295,493 | 275,383 | 140,888 | 240,315 |
| NA18881 | 14,284,979 | 279,075 | 144,963 | 243,660 |
| HG02113 | 14,412,939 | 234,606 | 119,263 | 196,980 |
| HG03717 | 14,391,234 | 242,990 | 124,663 | 203,258 |
| HG03716 | 14,473,880 | 243,853 | 126,169 | 207,184 |
| HG03714 | 14,391,135 | 242,196 | 124,954 | 203,989 |
| HG03713 | 14,491,057 | 240,029 | 122,747 | 201,496 |
| HG03711 | 14,484,791 | 239,208 | 123,369 | 202,625 |
| HG02611 | 14,286,293 | 279,007 | 144,669 | 243,306 |
| HG02610 | 14,410,821 | 270,913 | 136,210 | 232,464 |
| HG02613 | 14,416,290 | 268,859 | 135,087 | 230,053 |
| HG02614 | 14,287,666 | 277,884 | 145,009 | 243,632 |
| HG03718 | 14,484,082 | 239,538 | 123,539 | 203,644 |
| HG02406 | 14,509,405 | 233,206 | 118,330 | 195,001 |
| HG03478 | 14,407,979 | 271,337 | 135,748 | 233,231 |
| HG03479 | 14,286,867 | 277,797 | 142,580 | 243,208 |
| HG03472 | 14,404,548 | 273,163 | 137,595 | 234,191 |
| HG03473 | 14,288,638 | 278,710 | 141,725 | 242,593 |
| HG03470 | 14,285,452 | 278,656 | 142,910 | 244,144 |

|         |            |         |         |         |
|---------|------------|---------|---------|---------|
| HG03476 | 14,286,834 | 278,415 | 142,768 | 243,595 |
| HG03908 | 14,473,103 | 243,987 | 125,955 | 207,096 |
| HG03679 | 14,495,288 | 239,403 | 121,423 | 199,734 |
| HG03902 | 14,484,315 | 240,758 | 123,340 | 203,495 |
| HG03900 | 14,480,728 | 241,190 | 124,851 | 204,639 |
| HG03907 | 14,399,983 | 238,682 | 121,726 | 202,473 |
| HG03672 | 14,499,809 | 237,753 | 119,541 | 197,281 |
| HG03905 | 14,498,419 | 236,905 | 120,775 | 199,306 |
| HG02409 | 14,504,692 | 234,891 | 119,081 | 196,801 |
| HG01522 | 14,411,391 | 235,154 | 120,807 | 196,549 |
| HG01085 | 14,483,809 | 241,775 | 123,662 | 203,913 |
| HG01521 | 14,509,121 | 232,711 | 120,014 | 195,292 |
| HG04059 | 14,395,878 | 240,642 | 123,398 | 202,985 |
| HG01527 | 14,492,583 | 239,033 | 122,575 | 200,219 |
| HG01524 | 14,505,138 | 234,617 | 119,818 | 196,787 |
| HG01525 | 14,403,423 | 237,779 | 122,559 | 200,272 |
| HG04054 | 14,400,438 | 239,273 | 122,285 | 201,074 |
| HG01528 | 14,361,961 | 239,450 | 123,194 | 238,370 |
| HG04056 | 14,514,494 | 231,095 | 117,387 | 193,993 |
| HG03874 | 14,385,658 | 244,442 | 126,028 | 205,534 |
| HG02054 | 14,296,440 | 275,748 | 141,007 | 238,695 |
| HG03872 | 14,498,290 | 237,029 | 120,688 | 199,329 |
| HG03873 | 14,395,571 | 240,766 | 122,722 | 203,153 |
| HG03870 | 14,481,968 | 240,048 | 123,852 | 204,887 |
| HG03871 | 14,493,441 | 238,934 | 122,525 | 200,635 |
| HG02052 | 14,290,918 | 277,255 | 142,936 | 242,311 |
| HG02870 | 14,294,693 | 276,273 | 141,688 | 239,762 |
| HG01083 | 14,387,175 | 244,117 | 125,320 | 206,212 |
| HG02879 | 14,287,573 | 278,292 | 145,196 | 244,250 |
| HG02878 | 14,392,177 | 275,343 | 139,942 | 238,201 |
| HG01082 | 14,476,705 | 246,233 | 124,065 | 207,246 |
| HG00110 | 14,415,475 | 233,847 | 118,968 | 195,864 |
| HG00111 | 14,410,983 | 235,360 | 121,016 | 197,335 |
| HG00112 | 14,511,338 | 231,889 | 118,795 | 195,239 |
| HG00113 | 14,511,738 | 232,119 | 117,723 | 194,453 |
| HG00114 | 14,469,695 | 233,329 | 119,710 | 233,436 |
| HG00115 | 14,507,732 | 233,603 | 118,846 | 196,498 |
| HG00116 | 14,508,244 | 233,234 | 118,948 | 195,364 |
| HG00117 | 14,510,898 | 233,857 | 117,944 | 192,990 |
| HG00118 | 14,405,189 | 237,392 | 122,250 | 199,588 |
| HG00119 | 14,487,062 | 237,875 | 123,584 | 202,694 |
| HG01414 | 14,385,776 | 244,538 | 124,072 | 206,922 |
| HG01412 | 14,484,851 | 242,875 | 124,459 | 204,258 |
| HG01413 | 14,487,877 | 241,437 | 121,875 | 202,154 |
| HG03490 | 14,507,609 | 233,620 | 118,239 | 195,758 |
| HG03491 | 14,397,672 | 239,691 | 122,761 | 202,023 |
| HG03499 | 14,293,779 | 276,920 | 141,870 | 239,829 |
| HG02397 | 14,488,247 | 237,910 | 123,226 | 201,905 |
| NA12489 | 14,408,969 | 236,486 | 120,567 | 197,772 |
| NA20809 | 14,509,068 | 232,760 | 118,431 | 195,023 |
| HG04173 | 14,497,236 | 237,851 | 121,115 | 198,887 |
| NA20804 | 14,410,272 | 235,268 | 119,843 | 197,833 |
| NA20805 | 14,501,534 | 234,768 | 120,088 | 197,213 |
| NA20806 | 14,487,797 | 237,926 | 123,004 | 203,053 |
| NA20807 | 14,412,702 | 234,556 | 119,587 | 197,627 |
| NA20800 | 14,415,463 | 233,653 | 119,462 | 196,423 |
| NA20801 | 14,488,041 | 237,752 | 122,926 | 202,182 |
| NA20802 | 14,408,332 | 235,949 | 120,493 | 197,835 |
| NA20803 | 14,491,263 | 237,062 | 122,354 | 201,445 |
| HG00608 | 14,412,063 | 235,042 | 119,559 | 196,459 |
| NA12249 | 14,415,045 | 234,054 | 120,292 | 195,760 |
| HG00607 | 14,490,639 | 237,377 | 122,723 | 200,456 |
| HG02299 | 14,516,256 | 231,031 | 116,894 | 191,902 |
| HG02298 | 14,405,684 | 237,774 | 122,097 | 199,347 |
| NA19210 | 14,409,572 | 271,026 | 136,311 | 233,214 |
| NA19213 | 14,412,090 | 270,387 | 135,121 | 231,145 |
| HG02291 | 14,514,876 | 230,871 | 117,680 | 191,690 |
| NA19214 | 14,292,113 | 276,803 | 141,234 | 240,803 |
| HG02292 | 14,418,235 | 232,474 | 119,751 | 194,019 |

|         |            |         |         |         |
|---------|------------|---------|---------|---------|
| HG01089 | 14,382,755 | 245,441 | 126,265 | 207,265 |
| HG01088 | 14,480,517 | 243,702 | 123,805 | 205,905 |
| HG02058 | 14,500,180 | 237,102 | 120,430 | 197,446 |
| HG02057 | 14,393,743 | 242,330 | 124,032 | 202,186 |
| HG01086 | 14,389,253 | 243,129 | 124,266 | 204,790 |
| HG02053 | 14,411,082 | 270,328 | 134,753 | 231,018 |
| NA19107 | 14,415,113 | 268,991 | 133,897 | 230,478 |
| HG02051 | 14,414,697 | 269,108 | 134,629 | 230,513 |
| HG02050 | 14,507,107 | 233,981 | 118,559 | 196,035 |
| NA19454 | 14,389,762 | 275,162 | 140,656 | 237,580 |
| HG02147 | 14,420,433 | 232,570 | 118,835 | 193,257 |
| HG00739 | 14,500,655 | 236,815 | 119,544 | 198,706 |
| NA19108 | 14,295,687 | 275,120 | 141,326 | 240,697 |
| NA19457 | 14,295,347 | 276,134 | 141,659 | 240,429 |
| HG00731 | 14,494,342 | 238,428 | 122,225 | 200,072 |
| NA19455 | 14,419,218 | 267,777 | 133,169 | 229,373 |
| NA19102 | 14,284,277 | 279,505 | 144,386 | 243,206 |
| HG00734 | 14,378,531 | 246,460 | 126,789 | 208,656 |
| NA19452 | 14,417,760 | 268,019 | 133,691 | 229,119 |
| HG00736 | 14,478,457 | 241,440 | 124,875 | 205,450 |
| HG00737 | 14,385,687 | 244,452 | 125,186 | 205,599 |

Rare and Common Variants in 1000Genome data

| Chromosome   | Rare Variants    |               |               |               | Common Variants |                |                |               |
|--------------|------------------|---------------|---------------|---------------|-----------------|----------------|----------------|---------------|
|              | SNP              | INS           | DEL           | MAC           | SNP             | INS            | DEL            | MAC           |
| 1            | 236,232          | 3,575         | 5,480         | 1,228         | 67,276          | 8,180          | 10,612         | 1,910         |
| 2            | 273,255          | 3,751         | 6,699         | 1,534         | 76,700          | 8,998          | 12,735         | 2,425         |
| 3            | 223,547          | 3,301         | 5,576         | 1,249         | 64,811          | 8,297          | 10,978         | 2,100         |
| 4            | 249,922          | 1,991         | 4,561         | 1,004         | 65,473          | 3,840          | 5,523          | 1,035         |
| 5            | 205,315          | 3,361         | 5,244         | 1,220         | 59,263          | 7,801          | 10,410         | 1,911         |
| 6            | 191,183          | 2,870         | 5,174         | 1,055         | 57,744          | 6,928          | 9,524          | 1,840         |
| 7            | 174,749          | 2,745         | 4,261         | 810           | 53,069          | 6,178          | 8,542          | 1,389         |
| 8            | 171,643          | 2,476         | 4,184         | 925           | 49,148          | 5,441          | 7,194          | 1,515         |
| 9            | 128,810          | 1,815         | 2,846         | 574           | 36,960          | 4,349          | 5,841          | 1,083         |
| 10           | 143,404          | 3,225         | 1,972         | 708           | 43,093          | 4,903          | 6,769          | 1,280         |
| 11           | 145,849          | 2,054         | 3,397         | 804           | 43,272          | 4,926          | 6,704          | 1,330         |
| 12           | 142,612          | 2,321         | 3,762         | 855           | 42,966          | 5,266          | 7,278          | 1,331         |
| 13           | 117,271          | 1,995         | 3,347         | 643           | 34,622          | 5,000          | 6,470          | 1,266         |
| 14           | 97,928           | 1,564         | 2,372         | 594           | 29,010          | 3,787          | 4,726          | 916           |
| 15           | 85,535           | 1,290         | 2,058         | 437           | 24,484          | 2,839          | 3,942          | 646           |
| 16           | 87,690           | 935           | 1,766         | 498           | 24,392          | 2,721          | 3,292          | 663           |
| 17           | 77,265           | 1,002         | 1,704         | 413           | 21,693          | 2,419          | 3,410          | 524           |
| 18           | 87,754           | 1,258         | 2,108         | 526           | 25,720          | 3,302          | 4,306          | 739           |
| 19           | 54,126           | 695           | 1,129         | 344           | 16,925          | 1,640          | 2,228          | 545           |
| 20           | 61,133           | 921           | 1,464         | 320           | 17,652          | 1,760          | 2,550          | 546           |
| 21           | 41,789           | 676           | 1,056         | 271           | 12,354          | 1,469          | 2,167          | 487           |
| 22           | 33,643           | 493           | 740           | 177           | 10,208          | 949            | 1,404          | 222           |
| X            | 150,487          | 3,431         | 7,273         | 1,260         | 33,168          | 3,254          | 4,568          | 1,170         |
| Y            | 3,344            | 37            | 58            | 0             | 346             | 5              | 11             | 0             |
| <b>Total</b> | <b>3,184,486</b> | <b>47,782</b> | <b>78,231</b> | <b>17,449</b> | <b>910,349</b>  | <b>104,252</b> | <b>141,184</b> | <b>26,873</b> |
