# Supplementary material for: A reference catalog of DNA palindromes in the human genome and their variations in 1000 Genomes
Source: PubMed Central journal article supplement (PMC7680136; doi:10.1038/s41439-020-00127-5), 2020-11-20
Supplement: 41439_2020_127_MOESM5_ESM.pdf [file 41439_2020_127_MOESM5_ESM.pdf]

|    |           |    |   |     |           |         |                              |          |           |                          |             |                 |          |                 |
|----|-----------|----|---|-----|-----------|---------|------------------------------|----------|-----------|--------------------------|-------------|-----------------|----------|-----------------|
| 1  | 231899699 | 20 | T | G   | 231899704 | 483     | ponse to antineoplastic ag   | 1q42.2   | 231763958 | TSNAX-DISC1, DISC1       | rs2793086   | intron_variant  | 9.00E-06 | Near_to_perfect |
| 20 | 6980635   | 16 | G | T   | 6980635   | 113     | heimer's disease (late on    | 20p12.3  | 6999988   | BMP2 - LINC01428         | rs6085820   | itergenic_varia | 9.00E-06 | Near_to_perfect |
| 20 | 31531545  | 16 | C | T   | 31531544  | 654     | ype 1 diabetes nephropath    | 20q11.21 | 32943738  | EFCAB8                   | rs13045180  | stop_gained     | 9.00E-06 | Perfect_to_near |
| 20 | 43721490  | 10 | C | T   | 43721493  | 703     | Bipolar disorder             | 20q13.12 | 45092852  | KCNS1                    | rs6124684   | rime_UTR_var    | 9.00E-06 | Near_to_perfect |
| 20 | 44761483  | 8  | T | G   | 44761485  | 1414    | esponse to amphetamine       | 20q13.12 | 46132846  | CD40 - CDH22             | rs12480534  | stream_gene_v   | 9.00E-06 | Near_to_perfect |
| 2  | 9823879   | 20 | A | C   | 9823870   | 1501    | Mammographic density         | 2p25.1   | 9683741   | C101926982 - LOC10537374 | rs4669418   | intron_variant  | 9.00E-06 | Smaller         |
| 2  | 46321095  | 8  | G | A   | 46321094  | 3694    | Suicide risk                 | 2p21     | 46093955  | PRKCE                    | rs12373805  | intron_variant  | 9.00E-06 | Near_to_perfect |
| 2  | 124515039 | 18 | G | A   | 124515041 | 594     | yperactivity disorder (inatt | 2q14.3   | 123757465 | LOC105373596 - CNTNAP5   | rs13006237  | ream_gene_va    | 9.00E-06 | Perfect_to_near |
| 2  | 166370823 | 20 | A | C   | 166370826 | 3782    | ngevity (85 years and old    | 2q24.3   | 165514316 | CSRP3                    | rs6432832   | intron_variant  | 9.00E-06 | Near_to_perfect |
| 2  | 207121780 | 12 | A | G   | 207121782 | 974     | lar disorder and schizophr   | 2q33.3   | 206257058 | GPR1-AS                  | rs2058710   | intron_variant  | 9.00E-06 | Near_to_perfect |
| 2  | 234814051 | 0  | C | T   | 234814059 | 2698    | ulmonary function declin     | 2q37.1   | 233905414 | MSL3P1 - TRPM8           | rs10187654  | itergenic_varia | 9.00E-06 | New             |
| 3  | 13857968  | 14 | T | C   | 13857969  | 2093    | ive pulmonary disease-rel    | 3p25.1   | 13816472  | LINC00620 - WNT7A        | rs1124480   | rime_UTR_var    | 9.00E-06 | Near_to_perfect |
| 3  | 21447335  | 20 | G | A   | 21447336  | 366     | on in Tripanosoma cruzi s    | 3p24.3   | 21405844  | VENTXP7                  | rs409974    | g_transcript_ex | 9.00E-06 | Absent          |
| 3  | 34013202  | 20 | C | T   | 34013205  | 1256    | ance related behavioral di   | 3p22.3   | 33971713  | C105377024 - LOC1019287  | rs7620363   | itergenic_varia | 9.00E-06 | Near_to_perfect |
| 3  | 36842629  | 18 | T | A   | 36842623  | 1416    | isorder, bipolar disorder, i | 3p22.2   | 36801132  | C105377030 - LOC1053770  | rs13072940  | itergenic_varia | 9.00E-06 | Near_to_perfect |
| 3  | 40008630  | 24 | T | C   | 40008634  | 1338    | ormation processing spec     | 3p22.1   | 39967143  | MYRIP                    | rs9985399   | intron_variant  | 9.00E-06 | Near_to_perfect |
| 3  | 103450597 | 16 | A | C   | 103450591 | 1682    | IgG glycosylation            | 3q13.11  | 103731747 | MIR548AB - RAP1BP2       | rs2677247   | itergenic_varia | 9.00E-06 | Near_to_perfect |
| 3  | 138916395 | 10 | C | T   | 138916393 | 927     | IgG glycosylation            | 3q23     | 139197551 | BPESC1 - PISRT1          | rs11706018  | intron_variant  | 9.00E-06 | Near_to_perfect |
| 3  | 193537999 | 22 | C | T   | 193537991 | 4210    | on in chronic obstructive p  | 3q29     | 193820202 | C105374283 - LOC1053742  | rs1165640   | itergenic_varia | 9.00E-06 | Non_identical   |
| 4  | 7423753   | 26 | C | A   | 7423751   | 2046    | Obesity-related traits       | 4p16.1   | 7422024   | SORCS2                   | rs7694661   | intron_variant  | 9.00E-06 | Perfect_to_near |
| 4  | 89421082  | 18 | A | G   | 89421086  | 174     | ulmonary function declin     | 4q22.1   | 88499935  | HERC5                    | rs10516809  | onymous_vari    | 9.00E-06 | Perfect_to_near |
| 4  | 101901407 | 8  | A | C   | 101901410 | 154     | tion in Tripanosoma cruzi :  | 4q24     | 100980253 | LINC01216 - PPP3CA       | rs72927357  | itergenic_varia | 9.00E-06 | Near_to_perfect |
| 4  | 128320908 | 14 | T | C   | 128320908 | 189     | Obesity-related traits       | 4q28.1   | 127399753 | C102724210 - LOC1010607  | rs1443170   | intron_variant  | 9.00E-06 | Perfect_to_near |
| 4  | 131026480 | 18 | T | C   | 131026488 | 98      | bolite levels (HVA/MHPG      | 4q28.3   | 130105333 | C105377418 - LOC1027242  | rs114646238 | itergenic_varia | 9.00E-06 | Near_to_perfect |
| 4  | 165878334 | 20 | A | G   | 165878335 | 1395    | Obesity-related traits       | 4q32.3   | 164957183 | FAM218A, TRIM61          | rs3733418   | iissense_varia  | 9.00E-06 | Perfect_to_near |
| 5  | 98593452  | 8  | G | A   | 98593453  | 1090    | Periodontitis (Mean PAL)     | 5q21.1   | 99257749  | C102724810 - LOC1006528  | rs1500251   | itergenic_varia | 9.00E-06 | Near_to_perfect |
| 5  | 128722698 | 18 | G | A   | 128722696 | 2507    | Obesity-related traits       | 5q23.3   | 129387003 | LOC102723654             | rs10077875  | itergenic_varia | 9.00E-06 | Perfect_to_near |
| 6  | 20156176  | 22 | T | C   | 20156174  | 4465    | eractive-impulsive sympt     | 6p22.3   | 20155943  | MBOAT1                   | rs1202199   | intron_variant  | 9.00E-06 | Perfect_to_near |
| 6  | 20652718  | 14 | C | G   | 20652717  | 1736    | Type 2 diabetes              | 6p22.3   | 20652486  | CDKAL1                   | rs9295474   | intron_variant  | 9.00E-06 | Perfect_to_near |
| 6  | 44928955  | 8  | T | C   | 44928953  | 106     | Number of children           | 6p21.1   | 44961216  | SUPT3H                   | rs16872971  | intron_variant  | 9.00E-06 | Near_to_perfect |
| 6  | 164900595 | 20 | G | A   | 164900598 | 1242    | Major depressive disorder    | 6q27     | 164479565 | C105378107 - LOC1053781  | rs4709845   | itergenic_varia | 9.00E-06 | Near_to_perfect |
| 7  | 89628633  | 18 | G | A   | 89628635  | 605     | eschl's gyrus morpholog      | 7q21.13  | 89999321  | STEAP2-AS1               | rs73215715  | intron_variant  | 9.00E-06 | Perfect_to_near |
| 7  | 93199926  | 22 | T | A   | 93199928  | 3108    | Body mass index              | 7q21.3   | 93570616  | CALCR                    | rs7786765   | intron_variant  | 9.00E-06 | Near_to_perfect |
| 8  | 22400988  | 22 | C | T   | 22400989  | 144     | HIV-1 viral setpoint         | 8p21.3   | 22543476  | PPP3CC - SORBS3          | rs4872511   | g_transcript_ex | 9.00E-06 | Near_to_perfect |
| 8  | 40484241  | 24 | T | C   | 40484239  | 3697    | Fasting plasma glucose       | 8p11.21  | 40626720  | ZMAT4                    | rs2722425   | intron_variant  | 9.00E-06 | Perfect_to_near |
| 8  | 60623345  | 8  | A | C   | 60623348  | 3889    | Obesity-related traits       | 8q12.1   | 59710789  | C105375859 - LOC1053758  | rs12541902  | itergenic_varia | 9.00E-06 | Near_to_perfect |
| 8  | 121635389 | 18 | C | A   | 121635396 | 511     | lar disorder and schizophr   | 8q24.12  | 120623156 | SNTB1                    | rs6986718   | intron_variant  | 9.00E-06 | Near_to_perfect |
| 8  | 136989203 | 18 | C | T   | 136989204 | 582     | osomnia (caffeine-inducec    | 8q24.23  | 135976961 | KHDRBS3 - LOC105375778   | rs16905439  | itergenic_varia | 9.00E-06 | Perfect_to_near |
| 8  | 143691837 | 18 | T | A   | 143691838 | 1011    | lar disorder and schizophr   | 8q24.3   | 142610477 | ADGRB1 - ARC             | rs7465272   | stream_gene_v   | 9.00E-06 | Near_to_perfect |
| 9  | 119798884 | 14 | C | T   | 119798885 | 4811    | Glucose homeostasis trait    | 9q33.1   | 117036606 | ASTN2                    | rs7036846   | intron_variant  | 9.00E-06 | Near_to_perfect |
| 9  | 135344408 | 18 | G | A   | 135344407 | 2943    | Obesity-related traits       | 9q34.13  | 132469020 | C9orf171                 | rs569434    | intron_variant  | 9.00E-06 | Perfect_to_near |
| 10 | 70712055  | 20 | A | G   | 70712062  | 211     | epression (quantitative tra  | 10q22.1  | 68952306  | DDX50 - DDX21            | rs2017305   | ream_gene_va    | 9.00E-06 | Non_identical   |
| 10 | 99637584  | 20 | G | A   | 99637578  | 2486    | Metabolic syndrome           | 10q24.2  | 97877821  | CRTAC1                   | rs531676    | intron_variant  | 9.00E-06 | Bigger          |
| 11 | 18291740  | 14 | G | A   | 18291736  | 1592    | Lewy body disease            | 11p15.1  | 18270189  | SAA1 - HPS5              | rs11024598  | stream_gene_v   | 9.00E-06 | Non_identical   |
| 11 | 123956472 | 16 | A | G   | 123956466 | 951     | Obesity-related traits       | 11q24.2  | 124085759 | LOC105369545             | rs1893767   | atory_region_v  | 9.00E-06 | Smaller         |
| 12 | 48403769  | 14 | G | A   | 48403765  | 1087    | lar disorder and schizophr   | 12q13.11 | 48009982  | COL2A1                   | rs11168351  | intron_variant  | 9.00E-06 | Non_identical   |
| 12 | 79811433  | 18 | T | C   | 79811429  | 3516    | Classic bladder exstrophy    | 12q21.2  | 79417649  | SYT1                     | rs7310309   | intron_variant  | 9.00E-06 | Non_identical   |
| 16 | 54027965  | 20 | T | C   | 54027971  | 645     | ormone-binding globulin l    | 16q12.2  | 53994059  | FTO                      | rs12596210  | g_transcript_ex | 9.00E-06 | Smaller         |
| 3  | 64173894  | 18 | T | C   | 64173901  | 1520    | IgG glycosylation            | 3p14.1   | 64188225  | PRICKLE2-AS3, PRICKLE2   | rs1035275   | intron_variant  | 9.00E-06 | Non_identical   |
| 3  | 71464338  | 10 | G | A   | 71464335  | 110     | Migraine - clinic-based      | 3p13     | 71415184  | FOXP1                    | rs13063872  | intron_variant  | 9.00E-06 | Smaller         |
| 3  | 174029032 | 28 | A | G   | 174029045 | 3401    | Major depressive disorder    | 3q26.31  | 174311255 | NLGN1 - RPL8P4           | rs13074924  | itergenic_varia | 9.00E-06 | Smaller         |
| 6  | 44065319  | 32 | G | A   | 44065311  | 1404    | Major depressive disorder    | 6p21.1   | 44097574  | RPL29P16 - MRPL14        | rs7742824   | itergenic_varia | 9.00E-06 | Smaller         |
| 9  | 21035296  | 28 | G | T   | 21035307  | 2870    | Axial length                 | 9p21.3   | 21035308  | LOC105375989             | rs7867456   | ream_gene_va    | 9.00E-06 | Smaller         |
| 18 | 10382882  | 24 | C | T   | 10382883  | 2353    | erum protein levels (sST2    | 18p11.22 | 10382886  | LOC105371989             | rs206548    | stream_gene_v   | 9.00E+07 | Near_to_perfect |
| 19 | 45411944  | 8  | T | C   | 45411941  | 754     | Brain imaging                | 19q13.32 | 44908684  | APOE                     | rs429358    | iissense_varia  |          | Perfect_to_near |
| 1  | 63586972  | 8  | G | T   | 63586973  | 1040    | Brain imaging                | 1p31.3   | 63121302  | LOC105378769 - LINC00461 | rs7526034   | itergenic_varia |          | Near_to_perfect |
| 3  | 69623185  | 18 | G | A,T | 69623188  | 442,562 | Brain imaging                | 3p14.1   | 69574037  | FRMD4B - MITF            | rs7647307   | ream_gene_varia |          | Near_to_perfect |
