# Supplementary material for: A reference catalog of DNA palindromes in the human genome and their variations in 1000 Genomes
Source: PubMed Central journal article supplement (PMC7680136; doi:10.1038/s41439-020-00127-5), 2020-11-20
Supplement: 41439_2020_127_MOESM6_ESM.pdf [file 41439_2020_127_MOESM6_ESM.pdf]

| <b>Disease</b>                                                                        | <b>No.of SNPs associated with Palindromes</b> | <b>Percent of SNPs associated with Palindromes</b> |
|---------------------------------------------------------------------------------------|-----------------------------------------------|----------------------------------------------------|
| Obesity-related traits                                                                | 62                                            | 7.42                                               |
| Height                                                                                | 57                                            | 8.68                                               |
| IgG glycosylation                                                                     | 43                                            | 10.89                                              |
| Body mass index                                                                       | 36                                            | 8.55                                               |
| Crohn's disease                                                                       | 30                                            | 15.46                                              |
| Intelligence                                                                          | 28                                            | 50.91                                              |
| Schizophrenia                                                                         | 21                                            | 8.97                                               |
| F-cell distribution                                                                   | 20                                            | 64.52                                              |
| Type 2 diabetes                                                                       | 20                                            | 8.77                                               |
| Breast cancer                                                                         | 19                                            | 12.58                                              |
| Rheumatoid arthritis                                                                  | 17                                            | 9.29                                               |
| Blood metabolite levels                                                               | 17                                            | 9.14                                               |
| Prostate cancer                                                                       | 15                                            | 10.64                                              |
| Bipolar disorder and schizophrenia                                                    | 14                                            | 11.57                                              |
| Bipolar disorder                                                                      | 14                                            | 11.02                                              |
| PR interval in <i>Trypanosoma cruzi</i> seropositivity                                | 13                                            | 12.75                                              |
| Amyotrophic lateral sclerosis (sporadic)                                              | 13                                            | 7.26                                               |
| Response to amphetamines                                                              | 12                                            | 13.48                                              |
| Diisocyanate-induced asthma                                                           | 12                                            | 6.67                                               |
| Trans fatty acid levels                                                               | 11                                            | 8.40                                               |
| Motion sickness                                                                       | 10                                            | 28.57                                              |
| Bilirubin levels                                                                      | 10                                            | 26.32                                              |
| HDL cholesterol                                                                       | 10                                            | 6.54                                               |
| Hemostatic factors and hematological phenotypes                                       | 9                                             | 31.03                                              |
| Bone mineral density                                                                  | 9                                             | 7.96                                               |
| QT interval                                                                           | 9                                             | 6.21                                               |
| Multiple sclerosis                                                                    | 9                                             | 5.56                                               |
| Attention deficit-hyperactivity disorder, bipolar disorder, major depressive disorder | 8                                             | 10.81                                              |
| Colorectal cancer                                                                     | 8                                             | 9.76                                               |
| Metabolite levels                                                                     | 8                                             | 8.16                                               |
| Coronary heart disease                                                                | 8                                             | 8.00                                               |
| Inflammatory bowel disease                                                            | 8                                             | 6.96                                               |
| Total bilirubin levels in HIV-1 infection                                             | 7                                             | 63.64                                              |
| Alzheimer's disease (cognitive decline)                                               | 7                                             | 15.91                                              |
| Pulmonary function (interaction)                                                      | 7                                             | 15.91                                              |
| Educational attainment                                                                | 7                                             | 9.46                                               |
| Obesity                                                                               | 7                                             | 8.97                                               |
| Cognitive performance                                                                 | 7                                             | 5.93                                               |
| Ulcerative colitis                                                                    | 7                                             | 5.56                                               |
| Fasting glucose-related traits (interaction with BMI)                                 | 6                                             | 19.35                                              |
| IgA nephropathy                                                                       | 6                                             | 18.18                                              |
| Pulmonary function decline                                                            | 6                                             | 15.38                                              |
| Orofacial clefts                                                                      | 6                                             | 13.33                                              |
| Metabolic syndrome                                                                    | 6                                             | 12.77                                              |
| Thiazide-induced adverse metabolic effects in hypertensive patients                   | 6                                             | 10.17                                              |
| Amyotrophic lateral sclerosis                                                         | 6                                             | 10.17                                              |
| Cognitive function                                                                    | 6                                             | 9.84                                               |
| Glucose homeostasis traits                                                            | 6                                             | 8.57                                               |
| Waist-to-hip ratio adjusted for body mass index                                       | 6                                             | 8.45                                               |
| Inflammatory skin disease                                                             | 6                                             | 6.82                                               |
| Blood pressure                                                                        | 6                                             | 6.67                                               |
| Menarche (age at onset)                                                               | 6                                             | 3.49                                               |
| Nodular sclerosing Hodgkin lymphoma                                                   | 5                                             | 100.00                                             |
| Metabolite levels (Dihydroxy docosatrienoic acid)                                     | 5                                             | 25.00                                              |
| Information processing speed                                                          | 5                                             | 17.24                                              |
| Response to tocilizumab in rheumatoid arthritis                                       | 5                                             | 16.13                                              |

|                                                                    |   |        |
|--------------------------------------------------------------------|---|--------|
| Migraine - clinic-based                                            | 5 | 13.51  |
| QRS duration in <i>Tripanosoma cruzi</i> seropositivity            | 5 | 13.16  |
| Tuberculosis                                                       | 5 | 12.50  |
| Sitting height ratio                                               | 5 | 11.36  |
| Polychlorinated biphenyl levels                                    | 5 | 10.87  |
| Coronary artery calcification                                      | 5 | 8.93   |
| Response to antipsychotic treatment                                | 5 | 8.77   |
| Phospholipid levels (plasma)                                       | 5 | 8.06   |
| Urate levels                                                       | 5 | 7.35   |
| Migraine                                                           | 5 | 7.14   |
| Age-related macular degeneration                                   | 5 | 7.14   |
| Attention deficit hyperactivity disorder                           | 5 | 6.67   |
| Major depressive disorder                                          | 5 | 6.49   |
| Psoriasis                                                          | 5 | 5.62   |
| QT interval in <i>Tripanosoma cruzi</i> seropositivity             | 4 | 28.57  |
| Word reading                                                       | 4 | 26.67  |
| Sphingolipid levels                                                | 4 | 25.00  |
| Interstitial lung disease                                          | 4 | 22.22  |
| Glycerophospholipid levels                                         | 4 | 21.05  |
| Lewy body disease                                                  | 4 | 20.00  |
| Metabolite levels (MHPG)                                           | 4 | 20.00  |
| Neurofibrillary tangles                                            | 4 | 19.05  |
| Personality dimensions                                             | 4 | 19.05  |
| Response to anti-depressant treatment in major depressive disorder | 4 | 18.18  |
| Metabolite levels (Pyroglutamine)                                  | 4 | 17.39  |
| Metabolite levels (HVA/MHPG ratio)                                 | 4 | 16.00  |
| Liver enzyme levels (gamma-glutamyl transferase)                   | 4 | 15.38  |
| Alcohol dependence (age at onset)                                  | 4 | 15.38  |
| Hippocampal volume                                                 | 4 | 14.81  |
| Bone mineral density (spine)                                       | 4 | 14.81  |
| Leprosy                                                            | 4 | 12.90  |
| C-reactive protein                                                 | 4 | 12.50  |
| HIV-1 viral setpoint                                               | 4 | 12.12  |
| Heschl's gyrus morphology                                          | 4 | 12.12  |
| Iron status biomarkers                                             | 4 | 11.76  |
| Menopause (age at onset)                                           | 4 | 11.11  |
| Periodontitis (Mean PAL)                                           | 4 | 11.11  |
| Primary biliary cirrhosis                                          | 4 | 11.11  |
| Disc degeneration (lumbar)                                         | 4 | 11.11  |
| Heart rate                                                         | 4 | 10.81  |
| Visceral fat                                                       | 4 | 10.26  |
| Visceral adipose tissue/subcutaneous adipose tissue ratio          | 4 | 10.00  |
| Lipid metabolism phenotypes                                        | 4 | 9.76   |
| HIV-1 control                                                      | 4 | 8.70   |
| Protein quantitative trait loci                                    | 4 | 8.33   |
| Metabolic traits                                                   | 4 | 8.33   |
| Bipolar disorder (body mass index interaction)                     | 4 | 7.84   |
| Blood metabolite ratios                                            | 4 | 7.55   |
| Asthma                                                             | 4 | 7.41   |
| Red blood cell traits                                              | 4 | 6.35   |
| Celiac disease                                                     | 4 | 6.15   |
| Alzheimer's disease (late onset)                                   | 4 | 5.88   |
| Intraocular pressure                                               | 4 | 5.80   |
| Platelet count                                                     | 4 | 5.13   |
| Parkinson's disease                                                | 4 | 4.00   |
| LDL cholesterol                                                    | 4 | 3.39   |
| Response to diuretic therapy                                       | 3 | 100.00 |
| Osteoarthritis (hip)                                               | 3 | 60.00  |
| Type 2 diabetes and other traits                                   | 3 | 50.00  |

|                                                                               |   |       |
|-------------------------------------------------------------------------------|---|-------|
| Vitamin B levels in ischemic stroke                                           | 3 | 37.50 |
| Multiple myeloma and monoclonal gammopathy                                    | 3 | 33.33 |
| Adverse response to chemotherapy (neutropenia/leucopenia) (carboplatin)       | 3 | 33.33 |
| Response to antineoplastic agents                                             | 3 | 33.33 |
| Cannabis dependence                                                           | 3 | 30.00 |
| Blood trace element (Se levels)                                               | 3 | 30.00 |
| Brain imaging                                                                 | 3 | 30.00 |
| Nasopharyngeal carcinoma                                                      | 3 | 27.27 |
| Psychosis and Alzheimer's disease                                             | 3 | 27.27 |
| Electrodermal activity                                                        | 3 | 25.00 |
| Local histogram emphysema pattern                                             | 3 | 25.00 |
| Follicular lymphoma                                                           | 3 | 23.08 |
| Presence of antiphospholipid antibodies                                       | 3 | 23.08 |
| Elevated serum carcinoembryonic antigen levels                                | 3 | 23.08 |
| Immune response to smallpox (secreted IL-1beta)                               | 3 | 23.08 |
| Serum protein levels (sST2)                                                   | 3 | 21.43 |
| D-dimer levels                                                                | 3 | 20.00 |
| Tourette's syndrome or obsessive-compulsive disorder                          | 3 | 20.00 |
| Multiple myeloma                                                              | 3 | 17.65 |
| White blood cell types                                                        | 3 | 15.79 |
| Response to angiotensin II receptor blocker therapy                           | 3 | 15.00 |
| Fasting insulin-related traits (interaction with BMI)                         | 3 | 15.00 |
| Axial length                                                                  | 3 | 14.29 |
| HIV-1 susceptibility                                                          | 3 | 14.29 |
| Serum thyroid-stimulating hormone levels                                      | 3 | 13.64 |
| Bladder cancer                                                                | 3 | 13.64 |
| Attention deficit hyperactivity disorder (inattention symptoms)               | 3 | 13.64 |
| Erectile dysfunction and prostate cancer treatment                            | 3 | 13.04 |
| Graves' disease                                                               | 3 | 13.04 |
| Testicular germ cell tumor                                                    | 3 | 13.04 |
| Alzheimer's disease biomarkers                                                | 3 | 13.04 |
| Parasitemia in <i>Trypanosoma cruzi</i> seropositivity                        | 3 | 12.50 |
| Dementia and core Alzheimer's disease neuropathologic changes                 | 3 | 12.50 |
| Attention deficit hyperactivity disorder (hyperactivity-impulsivity symptoms) | 3 | 12.00 |
| Classic bladder exstrophy                                                     | 3 | 12.00 |
| Periodontitis (CDC/AAP)                                                       | 3 | 11.54 |
| Anorexia nervosa                                                              | 3 | 11.54 |
| Attention deficit hyperactivity disorder and conduct disorder                 | 3 | 11.54 |
| Diabetic retinopathy                                                          | 3 | 10.71 |
| Glycated hemoglobin levels                                                    | 3 | 10.71 |
| Refractive error                                                              | 3 | 10.34 |
| Metabolite levels (X-11787)                                                   | 3 | 10.34 |
| Verbal declarative memory                                                     | 3 | 9.68  |
| Chronic obstructive pulmonary disease-related biomarkers                      | 3 | 8.82  |
| Urate levels in obese individuals                                             | 3 | 8.57  |
| Vitiligo                                                                      | 3 | 8.11  |
| Calcium levels                                                                | 3 | 7.89  |
| Atopic dermatitis                                                             | 3 | 7.69  |
| Chronic lymphocytic leukemia                                                  | 3 | 7.14  |
| Longevity                                                                     | 3 | 6.98  |
| Immune response to smallpox vaccine (IL-6)                                    | 3 | 6.52  |
| Mean platelet volume                                                          | 3 | 5.66  |
| Alzheimer's disease                                                           | 3 | 5.26  |
| Pulmonary function                                                            | 3 | 4.84  |
| Hypertension                                                                  | 3 | 4.84  |
| Type 1 diabetes                                                               | 3 | 3.85  |
| Cholesterol, total                                                            | 3 | 3.30  |
| Triglycerides                                                                 | 3 | 2.91  |
| Systemic lupus erythematosus                                                  | 3 | 2.75  |

|                                                                         |   |        |
|-------------------------------------------------------------------------|---|--------|
| Rotator cuff tears                                                      | 2 | 100.00 |
| Sexual dysfunction (female)                                             | 2 | 66.67  |
| Suicide in bipolar disorder                                             | 2 | 50.00  |
| Mammographic density                                                    | 2 | 40.00  |
| Erythema nodosum in inflammatory bowel disease                          | 2 | 40.00  |
| Periodontitis                                                           | 2 | 33.33  |
| Optic nerve measurement (rim area)                                      | 2 | 33.33  |
| Blood pressure measurement (high sodium and potassium intervention)     | 2 | 33.33  |
| Myocardial infarction                                                   | 2 | 33.33  |
| Protein C levels                                                        | 2 | 28.57  |
| Cerebrospinal AB1-42 levels                                             | 2 | 28.57  |
| Smoking cessation in chronic obstructive pulmonary disease              | 2 | 25.00  |
| Electroencephalographic traits in alcoholism                            | 2 | 25.00  |
| HDL Cholesterol - Triglycerides (HDLC-TG)                               | 2 | 25.00  |
| Adverse response to chemotherapy (neutropenia/leucopenia) (paclitaxel)  | 2 | 25.00  |
| Osteoporosis-related phenotypes                                         | 2 | 25.00  |
| Interferon alpha levels in systemic lupus erythematosus                 | 2 | 25.00  |
| Myasthenia gravis                                                       | 2 | 25.00  |
| Bone mineral accretion in asthma (oral corticosteroid dose interaction) | 2 | 22.22  |
| Lung function (forced expiratory volume in 1 second)                    | 2 | 22.22  |
| Aging                                                                   | 2 | 22.22  |
| Amino acid levels                                                       | 2 | 22.22  |
| &beta;2-Glycoprotein I (&beta;2-GPI) plasma levels                      | 2 | 22.22  |
| Dietary macronutrient intake                                            | 2 | 22.22  |
| Body mass index in non-asthmatics                                       | 2 | 22.22  |
| Chronic obstructive pulmonary disease (moderate to severe)              | 2 | 22.22  |
| Lymphoma                                                                | 2 | 22.22  |
| Complement C3 and C4 levels                                             | 2 | 20.00  |
| Epilepsy (generalized)                                                  | 2 | 20.00  |
| Aging traits                                                            | 2 | 20.00  |
| Multiple sclerosis (OCB status)                                         | 2 | 20.00  |
| Febrile seizures (MMR vaccine-related)                                  | 2 | 20.00  |
| Vascular brain injury                                                   | 2 | 20.00  |
| Self-rated health                                                       | 2 | 20.00  |
| Longevity (90 years and older)                                          | 2 | 20.00  |
| Parkinson disease and lewy body pathology                               | 2 | 20.00  |
| Proinsulin levels                                                       | 2 | 20.00  |
| Eating disorders (purging via substances)                               | 2 | 18.18  |
| Response to antipsychotic treatment in schizophrenia (working memory)   | 2 | 18.18  |
| Male-pattern baldness                                                   | 2 | 18.18  |
| Total ventricular volume (Alzheimer's disease interaction)              | 2 | 18.18  |
| Prion diseases                                                          | 2 | 18.18  |
| Progressive supranuclear palsy                                          | 2 | 18.18  |
| Bone mineral density (paediatric, skull)                                | 2 | 18.18  |
| Subcortical brain region volumes                                        | 2 | 16.67  |
| Immunoglobulin A                                                        | 2 | 16.67  |
| Hyperactive-impulsive symptoms                                          | 2 | 15.38  |
| Colorectal cancer (diet interaction)                                    | 2 | 15.38  |
| Tonometry                                                               | 2 | 15.38  |
| Resting heart rate                                                      | 2 | 15.38  |
| Fat distribution (HIV)                                                  | 2 | 14.29  |
| Renal cell carcinoma                                                    | 2 | 14.29  |
| Vitamin D levels                                                        | 2 | 14.29  |
| Palmitoleic acid (16:1n-7) plasma levels                                | 2 | 13.33  |
| Liver enzyme levels (alanine transaminase)                              | 2 | 13.33  |
| Eating disorders                                                        | 2 | 13.33  |
| Conduct disorder (symptom count)                                        | 2 | 13.33  |
| Cutaneous malignant melanoma                                            | 2 | 12.50  |
| Polycystic ovary syndrome                                               | 2 | 12.50  |

|                                                                                  |   |       |
|----------------------------------------------------------------------------------|---|-------|
| Fractional exhaled nitric oxide (childhood)                                      | 2 | 12.50 |
| to anti-retroviral therapy (ddl/d4T) in HIV-1 infection (Grade 3 peripheral ne   | 2 | 12.50 |
| Periodontitis (PAL4Q3)                                                           | 2 | 12.50 |
| QT interval (interaction)                                                        | 2 | 11.76 |
| Survival in rectal cancer                                                        | 2 | 11.76 |
| Obesity (extreme)                                                                | 2 | 11.76 |
| Heart failure                                                                    | 2 | 11.76 |
| Lupus nephritis in systemic lupus erythematosus                                  | 2 | 11.76 |
| Economic and political preferences (environmentalism)                            | 2 | 11.76 |
| Preeclampsia                                                                     | 2 | 11.11 |
| Chagas cardiomyopathy in Tripanosoma cruzi seropositivity                        | 2 | 11.11 |
| Response to citalopram treatment                                                 | 2 | 11.11 |
| Breast cancer (early onset)                                                      | 2 | 11.11 |
| Cardiac Troponin-T levels                                                        | 2 | 11.11 |
| Homocysteine levels                                                              | 2 | 10.53 |
| Cardiac hypertrophy                                                              | 2 | 10.53 |
| Lipoprotein-associated phospholipase A2 activity and mass                        | 2 | 10.53 |
| Primary tooth development (time to first tooth eruption)                         | 2 | 10.53 |
| Non-alcoholic fatty liver disease histology (other)                              | 2 | 10.00 |
| Behavioural disinhibition (generation interaction)                               | 2 | 10.00 |
| Primary tooth development (number of teeth)                                      | 2 | 10.00 |
| Response to serotonin reuptake inhibitors in major depressive disorder           | 2 | 10.00 |
| RR interval (heart rate)                                                         | 2 | 10.00 |
| Idiopathic membranous nephropathy                                                | 2 | 9.52  |
| Very long-chain saturated fatty acid levels (fatty acid 20:0)                    | 2 | 9.52  |
| Urate levels (BMI interaction)                                                   | 2 | 9.52  |
| Methotrexate pharmacokinetics (acute lymphoblastic leukemia)                     | 2 | 9.52  |
| Type 1 diabetes autoantibodies                                                   | 2 | 8.70  |
| Alcohol consumption                                                              | 2 | 8.70  |
| Eosinophilic esophagitis                                                         | 2 | 8.70  |
| Sex hormone-binding globulin levels                                              | 2 | 8.33  |
| Magnesium levels                                                                 | 2 | 8.33  |
| Fasting plasma glucose                                                           | 2 | 8.00  |
| Waist-hip ratio                                                                  | 2 | 8.00  |
| Ejection fraction in Tripanosoma cruzi seropositivity                            | 2 | 8.00  |
| Venous thromboembolism                                                           | 2 | 7.69  |
| Coronary artery disease                                                          | 2 | 7.69  |
| Electrocardiographic traits                                                      | 2 | 7.41  |
| response to abacavir-containing treatment in HIV-1 infection (virologic failure) | 2 | 7.41  |
| Lipid traits                                                                     | 2 | 7.41  |
| Lung cancer                                                                      | 2 | 7.41  |
| Clozapine-induced agranulocytosis                                                | 2 | 7.14  |
| Blood pressure (smoking interaction)                                             | 2 | 7.14  |
| Cardiovascular disease risk factors                                              | 2 | 7.14  |
| Inflammatory biomarkers                                                          | 2 | 6.90  |
| Alcohol dependence                                                               | 2 | 6.90  |
| Alzheimer's disease in APOE e4- carriers                                         | 2 | 6.90  |
| Airflow obstruction                                                              | 2 | 6.67  |
| Urate levels in lean individuals                                                 | 2 | 6.67  |
| Breast size                                                                      | 2 | 6.45  |
| Migraine without aura                                                            | 2 | 6.25  |
| Immune response to smallpox (secreted IFN-alpha)                                 | 2 | 6.25  |
| Weight                                                                           | 2 | 6.06  |
| PR interval                                                                      | 2 | 5.88  |
| Hippocampal atrophy                                                              | 2 | 5.71  |
| Self-reported allergy                                                            | 2 | 5.71  |
| Subcutaneous adipose tissue                                                      | 2 | 5.41  |
| Mean corpuscular volume                                                          | 2 | 5.26  |
| Urate levels in overweight individuals                                           | 2 | 5.26  |

|                                                                                    |   |        |
|------------------------------------------------------------------------------------|---|--------|
| Uric acid levels                                                                   | 2 | 5.26   |
| Diastolic blood pressure                                                           | 2 | 4.55   |
| Visceral adipose tissue adjusted for BMI                                           | 2 | 4.55   |
| Systolic blood pressure                                                            | 2 | 4.55   |
| Prostate cancer (gene x gene interaction)                                          | 2 | 3.92   |
| Adiponectin levels                                                                 | 2 | 3.85   |
| Dental caries                                                                      | 2 | 3.13   |
| Myopia (pathological)                                                              | 2 | 2.56   |
| Mesial temporal lobe epilepsy with hippocampal sclerosis                           | 1 | 100.00 |
| Cholesterol                                                                        | 1 | 100.00 |
| Cholelithiasis-related traits in sickle cell anemia                                | 1 | 100.00 |
| Recombination rate (females)                                                       | 1 | 100.00 |
| Airway hyperresponsiveness                                                         | 1 | 100.00 |
| YKL-40 levels                                                                      | 1 | 100.00 |
| Odorant perception (isobutyraldehyde)                                              | 1 | 100.00 |
| Enteric fever                                                                      | 1 | 100.00 |
| Crohn's disease (time to surgery)                                                  | 1 | 100.00 |
| Tardive dyskinesia                                                                 | 1 | 100.00 |
| Otosclerosis                                                                       | 1 | 100.00 |
| Arterial stiffness                                                                 | 1 | 100.00 |
| 5-HTT brain serotonin transporter levels                                           | 1 | 100.00 |
| Functional MRI                                                                     | 1 | 50.00  |
| Allergic dermatitis (nickel)                                                       | 1 | 50.00  |
| Cerebrospinal AB1-42 levels in Alzheimer's disease dementia                        | 1 | 50.00  |
| Serum lipase activity                                                              | 1 | 50.00  |
| Orofacial clefts (interaction)                                                     | 1 | 50.00  |
| Angiotensin-converting enzyme activity                                             | 1 | 50.00  |
| Ulcerative colitis or Crohn's disease                                              | 1 | 50.00  |
| Protein biomarker                                                                  | 1 | 50.00  |
| Mixed cryoglobulinemia vasculitis in chronic hepatitis C infection                 | 1 | 50.00  |
| Neutrophil count in HIV-infection                                                  | 1 | 50.00  |
| Helicobacter pylori serologic status                                               | 1 | 50.00  |
| Chronic periodontitis                                                              | 1 | 50.00  |
| Lymphocyte counts                                                                  | 1 | 50.00  |
| Response to inhaled glucocorticoid treatment in asthma (percentage change of FEV1) | 1 | 50.00  |
| Nephrotic syndrome (acquired)                                                      | 1 | 50.00  |
| Urinary albumin excretion                                                          | 1 | 33.33  |
| Anxiety and major depressive disorder                                              | 1 | 33.33  |
| Plasma renin activity levels                                                       | 1 | 33.33  |
| Thrombin generation potential phenotypes                                           | 1 | 33.33  |
| Adverse response to radiation therapy                                              | 1 | 33.33  |
| Adverse response to chemotherapy in breast cancer (alopecia)                       | 1 | 33.33  |
| Adverse response to chemotherapy (neutropenia/leucopenia) (cyclophosphamide)       | 1 | 33.33  |
| Mood disorder in prion disease                                                     | 1 | 33.33  |
| Cortical thickness                                                                 | 1 | 33.33  |
| Natriuretic peptide levels                                                         | 1 | 33.33  |
| Hoarding                                                                           | 1 | 33.33  |
| Testicular cancer                                                                  | 1 | 33.33  |
| Colorectal cancer (calcium intake interaction)                                     | 1 | 33.33  |
| Age-related macular degeneration (smoking status interaction)                      | 1 | 33.33  |
| Suicidal ideation                                                                  | 1 | 33.33  |
| Free thyroxine concentration                                                       | 1 | 33.33  |
| Beta thalassemia/hemoglobin E disease                                              | 1 | 33.33  |
| Breast cancer (male)                                                               | 1 | 33.33  |
| Monocyte early outgrowth colony forming units                                      | 1 | 33.33  |
| Blood pressure measurement (cold pressor test)                                     | 1 | 25.00  |
| Brain structure (hippocampal volume)                                               | 1 | 25.00  |
| HIV-associated dementia                                                            | 1 | 25.00  |
| Serum alkaline phosphatase levels                                                  | 1 | 25.00  |

|                                                                                 |   |       |
|---------------------------------------------------------------------------------|---|-------|
| Sporadic pituitary adenoma                                                      | 1 | 25.00 |
| Insulin-related traits                                                          | 1 | 25.00 |
| Ileal carcinoids                                                                | 1 | 25.00 |
| Non-substance related behavioral disinhibition                                  | 1 | 25.00 |
| Vogt-Koyanagi-Harada syndrome                                                   | 1 | 25.00 |
| Other erythrocyte phenotypes                                                    | 1 | 25.00 |
| Mucinous ovarian carcinoma                                                      | 1 | 25.00 |
| Parent of origin effect on language impairment (paternal)                       | 1 | 25.00 |
| Matrix metalloproteinase levels                                                 | 1 | 25.00 |
| Crohn's disease and psoriasis                                                   | 1 | 25.00 |
| volume in cerebral autosomal-dominant arteriopathy with subcortical infarc      | 1 | 25.00 |
| Response to anti-TNF alpha therapy in inflammatory bowel disease                | 1 | 25.00 |
| Acenocoumarol maintenance dosage                                                | 1 | 25.00 |
| Osteoprotegerin levels                                                          | 1 | 25.00 |
| Longevity (85 years and older)                                                  | 1 | 25.00 |
| Immunoglobulin G index levels in multiple sclerosis                             | 1 | 25.00 |
| inferior lateral ventricle volume (Cerebrospinal fluid biomarker status interac | 1 | 25.00 |
| Type 2 diabetes (dietary heme iron intake interaction)                          | 1 | 25.00 |
| Suicide risk                                                                    | 1 | 25.00 |
| Asperger disorder                                                               | 1 | 20.00 |
| Soluble levels of adhesion molecules                                            | 1 | 20.00 |
| Hearing function                                                                | 1 | 20.00 |
| Non-word repetition                                                             | 1 | 20.00 |
| Sleep time                                                                      | 1 | 20.00 |
| Hyperopia                                                                       | 1 | 20.00 |
| Atrioventricular conduction                                                     | 1 | 20.00 |
| Urinary metabolites                                                             | 1 | 20.00 |
| Parkinson's disease (age of onset)                                              | 1 | 20.00 |
| Retinal vascular caliber                                                        | 1 | 20.00 |
| Male infertility                                                                | 1 | 20.00 |
| Pancreatitis                                                                    | 1 | 20.00 |
| Adverse response to chemotherapy (neutropenia/leucopenia) (gemcitabine)         | 1 | 20.00 |
| Non-obstructive azoospermia                                                     | 1 | 20.00 |
| Schizophrenia, bipolar disorder and depression (combined)                       | 1 | 20.00 |
| Freckles                                                                        | 1 | 20.00 |
| Sleep-related phenotypes                                                        | 1 | 20.00 |
| Hip circumference (psychosocial stress interaction)                             | 1 | 20.00 |
| Breast cancer (prognosis)                                                       | 1 | 20.00 |
| White matter microstructure (global fractional anisotropy)                      | 1 | 20.00 |
| Bladder cancer (smoking interaction)                                            | 1 | 20.00 |
| Cervical artery dissection                                                      | 1 | 20.00 |
| Gambling                                                                        | 1 | 20.00 |
| Plasma homocysteine levels (post-methionine load test)                          | 1 | 20.00 |
| Iris characteristics                                                            | 1 | 20.00 |
| Spontaneous preterm birth (preterm birth)                                       | 1 | 20.00 |
| Osteoarthritis biomarkers                                                       | 1 | 20.00 |
| Resistin levels                                                                 | 1 | 20.00 |
| Adverse response to chemotherapy in breast cancer (alopecia) (paclitaxel)       | 1 | 20.00 |
| Cerebrospinal P-tau181p levels                                                  | 1 | 20.00 |
| Erythrocyte sedimentation rate                                                  | 1 | 20.00 |
| Monocyte chemoattractant protein-1                                              | 1 | 20.00 |
| Partial epilepsies                                                              | 1 | 16.67 |
| Cerebral amyloid angiopathy                                                     | 1 | 16.67 |
| Non-alcoholic fatty liver disease histology (AST)                               | 1 | 16.67 |
| Social autistic-like traits                                                     | 1 | 16.67 |
| Non-small cell lung cancer (survival)                                           | 1 | 16.67 |
| Bone mineral density (paediatric, upper limb)                                   | 1 | 16.67 |
| Hormone measurements                                                            | 1 | 16.67 |
| Platelet thrombus formation                                                     | 1 | 16.67 |

|                                                                                                    |   |       |
|----------------------------------------------------------------------------------------------------|---|-------|
| Menarche and menopause (age at onset)                                                              | 1 | 16.67 |
| Acoustic startle blink response                                                                    | 1 | 16.67 |
| Arthritis (juvenile idiopathic)                                                                    | 1 | 16.67 |
| Nephropathy                                                                                        | 1 | 16.67 |
| Type 2 diabetes nephropathy                                                                        | 1 | 16.67 |
| Testicular germ cell cancer                                                                        | 1 | 16.67 |
| White matter integrity (interaction)                                                               | 1 | 16.67 |
| Nicotine use                                                                                       | 1 | 16.67 |
| Nonsyndromic cleft lip with or without cleft palate                                                | 1 | 16.67 |
| Erectile dysfunction in type 1 diabetes                                                            | 1 | 16.67 |
| Blood pressure measurement (low sodium intervention)                                               | 1 | 16.67 |
| Drug-induced liver injury (flucloxacillin)                                                         | 1 | 16.67 |
| Response to chemotherapy (neutropenia/leucopenia) (all topoisomerase inhibitors)                   | 1 | 16.67 |
| Acute lymphoblastic leukemia (B-cell precursor)                                                    | 1 | 16.67 |
| Birth length                                                                                       | 1 | 16.67 |
| Response to chemotherapy (neutropenia/leucopenia) (all anthracycline-based)                        | 1 | 16.67 |
| Hepatitis C induced liver fibrosis                                                                 | 1 | 16.67 |
| Osteosarcoma                                                                                       | 1 | 16.67 |
| Infantile hypertrophic pyloric stenosis                                                            | 1 | 16.67 |
| Sleep quality                                                                                      | 1 | 14.29 |
| Food antigen IgG levels                                                                            | 1 | 14.29 |
| Eosinophil counts                                                                                  | 1 | 14.29 |
| Exudative age-related macular degeneration                                                         | 1 | 14.29 |
| Forced expiratory volume in 1 second (environmental interaction)                                   | 1 | 14.29 |
| Schizophrenia or bipolar disorder                                                                  | 1 | 14.29 |
| Response to simvastatin treatment (PCSK9 protein level change)                                     | 1 | 14.29 |
| DNA methylation (parent-of-origin)                                                                 | 1 | 14.29 |
| Glycemic traits (pregnancy)                                                                        | 1 | 14.29 |
| Emphysema-related traits                                                                           | 1 | 14.29 |
| Insulin-like growth factors                                                                        | 1 | 14.29 |
| Narcolepsy                                                                                         | 1 | 14.29 |
| Adverse response to chemotherapy (neutropenia/leucopenia) (cisplatin)                              | 1 | 14.29 |
| Carotid atherosclerosis in HIV infection                                                           | 1 | 14.29 |
| Waist Circumference - Triglycerides (WC-TG)                                                        | 1 | 14.29 |
| Response to methylphenidate treatment in attention-deficit/hyperactivity disorder (blood pressure) | 1 | 14.29 |
| Vein graft stenosis in coronary artery bypass grafting                                             | 1 | 14.29 |
| Tourette syndrome                                                                                  | 1 | 14.29 |
| Blood trace element (Cu levels)                                                                    | 1 | 14.29 |
| Immune response to anthrax vaccine                                                                 | 1 | 12.50 |
| Aging (time to event)                                                                              | 1 | 12.50 |
| Number of children                                                                                 | 1 | 12.50 |
| Depression and alcohol dependence                                                                  | 1 | 12.50 |
| Psychosis in Alzheimer's disease                                                                   | 1 | 12.50 |
| Alopecia areata                                                                                    | 1 | 12.50 |
| Plasma amyloid beta peptide concentrations (ABx-42)                                                | 1 | 12.50 |
| Osteoarthritis                                                                                     | 1 | 12.50 |
| Hirschsprung disease                                                                               | 1 | 12.50 |
| Adiposity                                                                                          | 1 | 12.50 |
| Red blood cell count                                                                               | 1 | 12.50 |
| Response to statin therapy (LDL-C)                                                                 | 1 | 12.50 |
| Plasma omega-6 polyunsaturated fatty acid levels (dihomo-gamma-linolenic acid)                     | 1 | 12.50 |
| Seasonality                                                                                        | 1 | 12.50 |
| Renal sinus fat                                                                                    | 1 | 12.50 |
| Anxiety in major depressive disorder                                                               | 1 | 12.50 |
| Thyroid cancer                                                                                     | 1 | 12.50 |
| PR segment                                                                                         | 1 | 12.50 |
| Total ventricular volume                                                                           | 1 | 12.50 |
| Response to TNF antagonist treatment                                                               | 1 | 12.50 |
| Treatment response for severe sepsis                                                               | 1 | 12.50 |



|                                                                                       |   |       |
|---------------------------------------------------------------------------------------|---|-------|
| Estradiol levels                                                                      | 1 | 12.50 |
| Response to mTOR inhibitor (everolimus)                                               | 1 | 12.50 |
| Asparaginase hypersensitivity in acute lymphoblastic leukemia                         | 1 | 11.11 |
| Metabolite levels (HVA/5-HIAA ratio)                                                  | 1 | 11.11 |
| Age-related macular degeneration (GA)                                                 | 1 | 11.11 |
| Coffee consumption                                                                    | 1 | 11.11 |
| White matter integrity                                                                | 1 | 11.11 |
| Serum uric acid levels                                                                | 1 | 11.11 |
| Bone mineral density (paediatric, total body less head)                               | 1 | 11.11 |
| C-reactive protein and white blood cell count                                         | 1 | 11.11 |
| Insomnia (caffeine-induced)                                                           | 1 | 11.11 |
| Body mass index (change over time)                                                    | 1 | 11.11 |
| Oleic acid (18:1n-9) plasma levels                                                    | 1 | 11.11 |
| Renal function-related traits (sCR)                                                   | 1 | 11.11 |
| Response to radiotherapy in cancer (late toxicity)                                    | 1 | 11.11 |
| Type 1 diabetes nephropathy                                                           | 1 | 10.00 |
| Systolic blood pressure in sickle cell anemia                                         | 1 | 10.00 |
| Caffeine consumption                                                                  | 1 | 10.00 |
| Superior frontal gyrus grey matter volume                                             | 1 | 10.00 |
| Hepatocellular carcinoma                                                              | 1 | 10.00 |
| Esophageal squamous cell carcinoma                                                    | 1 | 10.00 |
| Renal function-related traits (eGRFcrea)                                              | 1 | 10.00 |
| Sex hormone levels                                                                    | 1 | 10.00 |
| Illicit drug use                                                                      | 1 | 10.00 |
| Central corneal thickness                                                             | 1 | 10.00 |
| Systolic blood pressure (alcohol consumption interaction)                             | 1 | 10.00 |
| Psychosis (atypical)                                                                  | 1 | 10.00 |
| Plasma amyloid beta peptide concentrations (ABx-40)                                   | 1 | 10.00 |
| Response to antipsychotic treatment in schizophrenia (reasoning)                      | 1 | 10.00 |
| Acylcarnitine levels                                                                  | 1 | 9.09  |
| Type 1 diabetes and autoimmune thyroid diseases                                       | 1 | 9.09  |
| Yu-Zhi constitution type in type 2 diabetes                                           | 1 | 9.09  |
| Cognitive decline (age-related)                                                       | 1 | 9.09  |
| Glaucoma                                                                              | 1 | 9.09  |
| Folate pathway vitamin levels                                                         | 1 | 9.09  |
| vWF and FVIII levels                                                                  | 1 | 9.09  |
| Immune response to measles-mumps-rubella vaccine                                      | 1 | 9.09  |
| Lifetime average cigarettes per day in chronic obstructive pulmonary disease          | 1 | 9.09  |
| Metabolite levels (5-HIAA/ MHPG Ratio)                                                | 1 | 9.09  |
| Attention deficit hyperactivity disorder (time to onset)                              | 1 | 9.09  |
| Blood and toenail selenium levels                                                     | 1 | 8.33  |
| Electrocardiographic conduction measures                                              | 1 | 8.33  |
| Conduct disorder                                                                      | 1 | 8.33  |
| Hematological parameters                                                              | 1 | 8.33  |
| Multiple sclerosis (severity)                                                         | 1 | 8.33  |
| Number of pregnancies                                                                 | 1 | 8.33  |
| Mean corpuscular hemoglobin concentration                                             | 1 | 8.33  |
| Economic and political preferences (feminism/equality)                                | 1 | 8.33  |
| Hypertriglyceridemia                                                                  | 1 | 8.33  |
| Radiation response                                                                    | 1 | 8.33  |
| Body mass index (interaction)                                                         | 1 | 8.33  |
| Palmitic acid (16:0) plasma levels                                                    | 1 | 8.33  |
| Allergic sensitization                                                                | 1 | 8.33  |
| Insulin resistance/response                                                           | 1 | 7.69  |
| Aortic root size                                                                      | 1 | 7.69  |
| Response to chemotherapy in breast cancer hypertensive cases (cumulative dose) (beta) | 1 | 7.69  |
| Non-alcoholic fatty liver disease histology (lobular)                                 | 1 | 7.69  |
| Response to taxane treatment (paclitaxel)                                             | 1 | 7.69  |
| Malaria                                                                               | 1 | 7.69  |

|                                                                       |   |      |
|-----------------------------------------------------------------------|---|------|
| Esophageal cancer                                                     | 1 | 7.69 |
| Metabolite levels (5-HIAA)                                            | 1 | 7.69 |
| Hippocampal sclerosis                                                 | 1 | 7.69 |
| Depression (quantitative trait)                                       | 1 | 7.69 |
| Fasting insulin (interaction)                                         | 1 | 7.14 |
| Multiple myeloma (hyperdiploidy)                                      | 1 | 7.14 |
| Serum metabolite levels                                               | 1 | 7.14 |
| Anger                                                                 | 1 | 7.14 |
| Waist-to-hip circumference ratio (interaction)                        | 1 | 7.14 |
| Liver enzyme levels (alkaline phosphatase)                            | 1 | 7.14 |
| Periodontitis (DPAL)                                                  | 1 | 7.14 |
| Refractive astigmatism                                                | 1 | 6.67 |
| Infant length                                                         | 1 | 6.67 |
| Lipoprotein (a) - cholesterol levels                                  | 1 | 6.67 |
| Ovarian cancer                                                        | 1 | 6.67 |
| Behcet's disease                                                      | 1 | 6.67 |
| Metabolic syndrome (bivariate traits)                                 | 1 | 6.67 |
| Economic and political preferences (immigration/crime)                | 1 | 6.67 |
| Post-traumatic stress disorder (adjusted for relatedness)             | 1 | 6.67 |
| Conduct disorder (interaction)                                        | 1 | 6.67 |
| Lead levels in blood                                                  | 1 | 6.67 |
| Response to hepatitis C treatment                                     | 1 | 6.67 |
| Inattentive symptoms                                                  | 1 | 6.67 |
| Renal function-related traits (BUN)                                   | 1 | 6.67 |
| Chronic hepatitis B infection                                         | 1 | 6.67 |
| Homeostasis model assessment of insulin resistance (interaction)      | 1 | 6.67 |
| IgE levels                                                            | 1 | 6.25 |
| Temperament                                                           | 1 | 6.25 |
| Toenail selenium levels                                               | 1 | 6.25 |
| Clozapine-induced cytotoxicity                                        | 1 | 6.25 |
| Response to taxane treatment (docetaxel)                              | 1 | 6.25 |
| Hip geometry                                                          | 1 | 6.25 |
| Alzheimer's disease in APOE e4+ carriers                              | 1 | 5.88 |
| Economic and political preferences                                    | 1 | 5.88 |
| Panic disorder                                                        | 1 | 5.88 |
| Non-small cell lung cancer                                            | 1 | 5.88 |
| Neuritic plaque                                                       | 1 | 5.88 |
| Acne (severe)                                                         | 1 | 5.88 |
| Fasting glucose-related traits                                        | 1 | 5.88 |
| Corneal curvature                                                     | 1 | 5.56 |
| Optic disc area                                                       | 1 | 5.56 |
| Response to antipsychotic therapy (extrapyramidal side effects)       | 1 | 5.56 |
| Antineutrophil cytoplasmic antibody-associated vasculitis             | 1 | 5.56 |
| Systemic sclerosis                                                    | 1 | 5.56 |
| Political ideology                                                    | 1 | 5.26 |
| DNA methylation (variation)                                           | 1 | 5.26 |
| Perioperative myocardial infarction in coronary artery bypass surgery | 1 | 5.26 |
| Gout                                                                  | 1 | 5.26 |
| Antibody status in <i>Trypanosoma cruzi</i> seropositivity            | 1 | 5.00 |
| Sleep duration                                                        | 1 | 5.00 |
| Cannabis use (initiation)                                             | 1 | 5.00 |
| Frontotemporal dementia                                               | 1 | 5.00 |
| Atrial fibrillation                                                   | 1 | 5.00 |
| Asthma and hay fever                                                  | 1 | 4.76 |
| Airway responsiveness in chronic obstructive pulmonary disease        | 1 | 4.76 |
| Social communication problems                                         | 1 | 4.76 |
| Brain structure                                                       | 1 | 4.76 |
| Attention deficit hyperactivity disorder (combined symptoms)          | 1 | 4.76 |
| Capecitabine sensitivity                                              | 1 | 4.76 |

|                                                                                   |   |      |
|-----------------------------------------------------------------------------------|---|------|
| Urinary metabolites (H-NMR features)                                              | 1 | 4.76 |
| Pit-and-Fissure caries                                                            | 1 | 4.55 |
| Epithelial ovarian cancer                                                         | 1 | 4.55 |
| Multiple myeloma (IgH translocation)                                              | 1 | 4.35 |
| Migraine with aura                                                                | 1 | 4.35 |
| End-stage coagulation                                                             | 1 | 4.35 |
| Serum dimethylarginine levels (asymmetric/symmetric ratio)                        | 1 | 4.17 |
| Pubertal anthropometrics                                                          | 1 | 4.17 |
| C-reactive protein levels                                                         | 1 | 4.00 |
| Ankylosing spondylitis                                                            | 1 | 4.00 |
| Electroencephalogram traits                                                       | 1 | 3.85 |
| Bronchopulmonary dysplasia                                                        | 1 | 3.85 |
| Neutrophil count                                                                  | 1 | 3.85 |
| Hematological and biochemical traits                                              | 1 | 3.85 |
| Thyroid hormone levels                                                            | 1 | 3.85 |
| Endometriosis                                                                     | 1 | 3.70 |
| Smoking initiation                                                                | 1 | 3.70 |
| QRS duration                                                                      | 1 | 3.70 |
| Age-related hearing impairment                                                    | 1 | 3.45 |
| Corneal astigmatism                                                               | 1 | 3.33 |
| Telomere length                                                                   | 1 | 3.33 |
| Asthma (childhood onset)                                                          | 1 | 3.23 |
| Corneal structure                                                                 | 1 | 3.23 |
| Chronic kidney disease                                                            | 1 | 3.23 |
| Allergic rhinitis                                                                 | 1 | 3.23 |
| Response to efavirenz-containing treatment in HIV 1 infection (virologic failure) | 1 | 2.86 |
| Fibrinogen                                                                        | 1 | 2.70 |
| Response to statin therapy                                                        | 1 | 2.63 |
| Smoking behavior                                                                  | 1 | 2.44 |
| Pancreatic cancer                                                                 | 1 | 2.08 |
| Sudden cardiac arrest                                                             | 1 | 2.00 |

| <b>SNP Id</b> | <b>ulomeDBScore</b> |
|---------------|---------------------|
| rs679087      | 0                   |
| rs2262909     | 0                   |
| rs13126513    | 0                   |
| rs472402      | 0                   |
| rs542340      | 0                   |
| rs650258      | 0                   |
| rs7147996     | 0                   |
| rs11590421    | 0                   |
| rs186133190   | 0                   |
| rs1544167     | 0                   |
| rs10508921    | 0                   |
| rs531676      | 0                   |
| rs315135      | 0                   |
| rs4902960     | 0                   |
| rs17439560    | 0                   |
| rs5752223     | 0                   |
| rs4538475     | 0                   |
| rs12527089    | 0                   |
| rs10795917    | 0                   |
| rs10904849    | 0                   |
| rs17774576    | 0                   |
| rs10994336    | 0                   |
| rs113808744   | 0                   |
| rs2071348     | 0                   |
| rs9633835     | 0                   |
| rs17556665    | 0                   |
| rs17439299    | 0                   |
| rs10160456    | 0                   |
| rs1351696     | 0                   |
| rs1391576     | 0                   |
| rs600550      | 0                   |
| rs112295236   | 0                   |
| rs1723838     | 0                   |
| rs1357339     | 0                   |
| rs10501568    | 0                   |
| rs2658782     | 0                   |
| rs2075290     | 0                   |
| rs2075290     | 0                   |
| rs2075290     | 0                   |
| rs55974252    | 0                   |
| rs2900333     | 0                   |
| rs2900333     | 0                   |
| rs148621641   | 0                   |
| rs991427      | 0                   |
| rs10861337    | 0                   |
| rs3782455     | 0                   |
| rs9533090     | 0                   |
| rs9533090     | 0                   |
| rs9533799     | 0                   |
| rs8000124     | 0                   |
| rs186967887   | 0                   |
| rs10492494    | 0                   |
| rs3765535     | 0                   |
| rs12891047    | 0                   |

|             |   |
|-------------|---|
| rs28890483  | 0 |
| rs75598935  | 0 |
| rs1993293   | 0 |
| rs189178161 | 0 |
| rs10521114  | 0 |
| rs8045064   | 0 |
| rs17177078  | 0 |
| rs17281813  | 0 |
| rs16967753  | 0 |
| rs2013441   | 0 |
| rs225190    | 0 |
| rs8074751   | 0 |
| rs11654749  | 0 |
| rs206548    | 0 |
| rs2865126   | 0 |
| rs6508673   | 0 |
| rs1187220   | 0 |
| rs17512836  | 0 |
| rs62096106  | 0 |
| rs62096106  | 0 |
| rs2980976   | 0 |
| rs17073641  | 0 |
| rs17088339  | 0 |
| rs412658    | 0 |
| rs8105815   | 0 |
| rs6857      | 0 |
| rs6857      | 0 |
| rs6857      | 0 |
| rs6857      | 0 |
| rs6857      | 0 |
| rs6857      | 0 |
| rs6857      | 0 |
| rs6857      | 0 |
| rs503279    | 0 |
| rs503279    | 0 |
| rs10903027  | 0 |
| rs7533254   | 0 |
| rs114216682 | 0 |
| rs10159302  | 0 |
| rs1125777   | 0 |
| rs12568010  | 0 |
| rs41453448  | 0 |
| rs1125777   | 0 |
| rs12568010  | 0 |
| rs7526034   | 0 |
| rs12069782  | 0 |
| rs12122440  | 0 |
| rs903263    | 0 |
| rs12058524  | 0 |
| rs6691316   | 0 |
| rs6684514   | 0 |
| rs6684514   | 0 |
| rs6659742   | 0 |
| rs74133262  | 0 |
| rs2793086   | 0 |

|            |   |
|------------|---|
| rs6677208  | 0 |
| rs761998   | 0 |
| rs6043979  | 0 |
| rs6124684  | 0 |
| rs6097169  | 0 |
| rs12530    | 0 |
| rs12611820 | 0 |
| rs13403149 | 0 |
| rs1405262  | 0 |
| rs17043947 | 0 |
| rs13012266 | 0 |
| rs2540917  | 0 |
| rs9309413  | 0 |
| rs6733938  | 0 |
| rs1375144  | 0 |
| rs10496964 | 0 |
| rs958672   | 0 |
| rs2074955  | 0 |
| rs13389219 | 0 |
| rs6432832  | 0 |
| rs7587026  | 0 |
| rs12476289 | 0 |
| rs59979824 | 0 |
| rs7563911  | 0 |
| rs7589014  | 0 |
| rs2348114  | 0 |
| rs4673553  | 0 |
| rs7580717  | 0 |
| rs9287638  | 0 |
| rs17684824 | 0 |
| rs9837561  | 0 |
| rs2569991  | 0 |
| rs4330281  | 0 |
| rs3821396  | 0 |
| rs9985399  | 0 |
| rs75594032 | 0 |
| rs7647307  | 0 |
| rs10511112 | 0 |
| rs13078807 | 0 |
| rs13078807 | 0 |
| rs17023900 | 0 |
| rs2677247  | 0 |
| rs1488193  | 0 |
| rs1386478  | 0 |
| rs7632070  | 0 |
| rs9868873  | 0 |
| rs9856151  | 0 |
| rs11706018 | 0 |
| rs9825379  | 0 |
| rs16851720 | 0 |
| rs11924705 | 0 |
| rs6789378  | 0 |
| rs9878522  | 0 |
| rs11923600 | 0 |
| rs13068101 | 0 |

|             |   |
|-------------|---|
| rs6844339   | 0 |
| rs1533317   | 0 |
| rs222054    | 0 |
| rs17484474  | 0 |
| rs148915469 | 0 |
| rs72927357  | 0 |
| rs1908039   | 0 |
| rs13113376  | 0 |
| rs1908038   | 0 |
| rs1800789   | 0 |
| rs4376189   | 0 |
| rs12109285  | 0 |
| rs16898904  | 0 |
| rs2229882   | 0 |
| rs10940138  | 0 |
| rs12153606  | 0 |
| rs1500251   | 0 |
| rs6887649   | 0 |
| rs193541    | 0 |
| rs17468244  | 0 |
| rs146579248 | 0 |
| rs2457174   | 0 |
| rs6890562   | 0 |
| rs10065813  | 0 |
| rs29784     | 0 |
| rs6459467   | 0 |
| rs2647045   | 0 |
| rs9469300   | 0 |
| rs9381040   | 0 |
| rs734597    | 0 |
| rs2207139   | 0 |
| rs2207139   | 0 |
| rs9395865   | 0 |
| rs7744813   | 0 |
| rs13202860  | 0 |
| rs9320598   | 0 |
| rs17059400  | 0 |
| rs458017    | 0 |
| rs3812111   | 0 |
| rs531930    | 0 |
| rs9375674   | 0 |
| rs679582    | 0 |
| rs9496398   | 0 |
| rs6930576   | 0 |
| rs2063714   | 0 |
| rs4709845   | 0 |
| rs1056053   | 0 |
| rs740083    | 0 |
| rs142857449 | 0 |
| rs10262915  | 0 |
| rs6465411   | 0 |
| rs13221576  | 0 |
| rs4729127   | 0 |
| rs3779483   | 0 |
| rs4730268   | 0 |

|             |   |
|-------------|---|
| rs4730273   | 0 |
| rs9641855   | 0 |
| rs2888674   | 0 |
| rs10480300  | 0 |
| rs10480300  | 0 |
| rs4872511   | 0 |
| rs196889    | 0 |
| rs4732957   | 0 |
| rs7830371   | 0 |
| rs2033732   | 0 |
| rs160451    | 0 |
| rs11558471  | 0 |
| rs11558471  | 0 |
| rs11558471  | 0 |
| rs6986718   | 0 |
| rs16925298  | 0 |
| rs1110183   | 0 |
| rs11138290  | 0 |
| rs1875620   | 0 |
| rs2081670   | 0 |
| rs7045138   | 0 |
| rs7027110   | 0 |
| rs4838255   | 0 |
| rs765132    | 0 |
| rs12243039  | 0 |
| rs501120    | 0 |
| rs501120    | 0 |
| rs2801405   | 0 |
| rs758569    | 0 |
| rs7394570   | 0 |
| rs1167125   | 0 |
| rs7974425   | 0 |
| rs2325244   | 0 |
| rs3742207   | 0 |
| rs12884468  | 0 |
| rs12100561  | 0 |
| rs4349147   | 0 |
| rs12444268  | 0 |
| rs2865531   | 0 |
| rs2865531   | 0 |
| rs10514604  | 0 |
| rs3826782   | 0 |
| rs183353539 | 0 |
| rs1120900   | 0 |
| rs2064689   | 0 |
| rs1004819   | 0 |
| rs2201841   | 0 |
| rs11209026  | 0 |
| rs1343151   | 0 |
| rs10889677  | 0 |
| rs12567232  | 0 |
| rs1932064   | 0 |
| rs11165354  | 0 |
| rs1891498   | 0 |
| rs3093059   | 0 |



|             |   |
|-------------|---|
| rs6056209   | 0 |
| rs816535    | 0 |
| rs541041    | 0 |
| rs4315565   | 0 |
| rs7594321   | 0 |
| rs11890081  | 0 |
| rs6716753   | 0 |
| rs10201872  | 0 |
| rs7423615   | 0 |
| rs17275498  | 0 |
| rs1669070   | 0 |
| rs12475512  | 0 |
| rs3103267   | 0 |
| rs10933436  | 0 |
| rs2241880   | 0 |
| rs3792109   | 0 |
| rs6704644   | 0 |
| rs2602381   | 0 |
| rs11891311  | 0 |
| rs887829    | 0 |
| rs887829    | 0 |
| rs887829    | 0 |
| rs887829    | 0 |
| rs887829    | 0 |
| rs887829    | 0 |
| rs887829    | 0 |
| rs11563251  | 0 |
| rs11563251  | 0 |
| rs10187654  | 0 |
| rs7577262   | 0 |
| rs6741751   | 0 |
| rs6741751   | 0 |
| rs6741751   | 0 |
| rs6741751   | 0 |
| rs11887188  | 0 |
| rs896543    | 0 |
| rs75968099  | 0 |
| rs1511453   | 0 |
| rs13145041  | 0 |
| rs875033    | 0 |
| rs9341808   | 0 |
| rs404256    | 0 |
| rs12195230  | 0 |
| rs271170    | 0 |
| rs7783529   | 0 |
| rs17169634  | 0 |
| rs4947534   | 0 |
| rs4947534   | 0 |
| rs3735025   | 0 |
| rs10234749  | 0 |
| rs2738058   | 0 |
| rs2738058   | 0 |
| rs2738058   | 0 |
| rs181166265 | 0 |
| rs514716    | 0 |

|             |   |
|-------------|---|
| rs294856    | 0 |
| rs5904818   | 0 |
| rs11864909  | 0 |
| rs11864909  | 0 |
| rs470490    | 0 |
| rs2570916   | 0 |
| rs761926    | 0 |
| rs6781149   | 0 |
| rs1165640   | 0 |
| rs7735699   | 0 |
| rs186263310 | 0 |
| rs1357978   | 0 |
| rs12666280  | 0 |
| rs5916687   | 0 |
| rs5943057   | 0 |
| rs2306677   | 0 |
| rs11168351  | 0 |
| rs7310309   | 0 |
| rs10745527  | 0 |
| rs1021188   | 0 |
| rs12429545  | 0 |
| rs78319313  | 0 |
| rs7144649   | 0 |
| rs6573416   | 0 |
| rs17101394  | 0 |
| rs2453533   | 0 |
| rs16951021  | 0 |
| rs34517613  | 0 |
| rs318095    | 0 |
| rs7533254   | 0 |
| rs2064689   | 0 |
| rs1004819   | 0 |
| rs2201841   | 0 |
| rs11209026  | 0 |
| rs1343151   | 0 |
| rs10889677  | 0 |
| rs12567232  | 0 |
| rs1023008   | 0 |
| rs6695572   | 0 |
| rs12044963  | 0 |
| rs8133843   | 0 |
| rs7578465   | 0 |
| rs604381    | 0 |
| rs1206397   | 0 |
| rs11677416  | 0 |
| rs16841200  | 0 |
| rs7576072   | 0 |
| rs3815854   | 0 |
| rs3815854   | 0 |
| rs6795349   | 0 |
| rs6782531   | 0 |
| rs1035275   | 0 |
| rs6439167   | 0 |
| rs6444931   | 0 |
| rs10513686  | 0 |

|             |   |
|-------------|---|
| rs7690543   | 0 |
| rs6828740   | 0 |
| rs2710833   | 0 |
| rs469339    | 0 |
| rs1515641   | 0 |
| rs7765379   | 0 |
| rs7765379   | 0 |
| rs7765379   | 0 |
| rs12204683  | 0 |
| rs6569474   | 0 |
| rs2267739   | 0 |
| rs6959212   | 0 |
| rs6959212   | 0 |
| rs116979167 | 0 |
| rs10242100  | 0 |
| rs73660619  | 0 |
| rs4841132   | 0 |
| rs4841132   | 0 |
| rs4841132   | 0 |
| rs4841132   | 0 |
| rs7017212   | 0 |
| rs12542677  | 0 |
| rs10504390  | 0 |
| rs113889867 | 0 |
| rs343496    | 0 |
| rs1873747   | 0 |
| rs150611042 | 0 |
| rs2519093   | 0 |
| rs5980075   | 0 |
| rs5928363   | 0 |
| rs1334893   | 0 |
| rs61458523  | 0 |
| rs4076555   | 0 |
| rs1573535   | 0 |
| rs2057178   | 0 |
| rs495366    | 0 |
| rs17368659  | 0 |
| rs1816537   | 0 |
| rs2731620   | 0 |
| rs11564258  | 0 |
| rs11564258  | 0 |
| rs11057405  | 0 |
| rs7296418   | 0 |
| rs6563210   | 0 |
| rs4143912   | 0 |
| rs2842346   | 0 |
| rs711355    | 0 |
| rs2306786   | 0 |
| rs3884558   | 0 |
| rs3884558   | 0 |
| rs6496044   | 0 |
| rs1104918   | 0 |
| rs735951    | 0 |
| rs1381102   | 0 |
| rs1991867   | 0 |

|             |   |
|-------------|---|
| rs1991867   | 0 |
| rs7207400   | 0 |
| rs11662763  | 0 |
| rs10502739  | 0 |
| rs17697518  | 0 |
| rs2635047   | 0 |
| rs16949825  | 0 |
| rs12959200  | 0 |
| rs10469074  | 0 |
| rs9961113   | 0 |
| rs147615524 | 0 |
| rs2064689   | 0 |
| rs1004819   | 0 |
| rs2201841   | 0 |
| rs11209026  | 0 |
| rs1343151   | 0 |
| rs10889677  | 0 |
| rs12567232  | 0 |
| rs17121403  | 0 |
| rs602633    | 0 |
| rs2774292   | 0 |
| rs4076764   | 0 |
| rs4611001   | 0 |
| rs7274811   | 0 |
| rs6088735   | 0 |
| rs1371614   | 0 |
| rs6545816   | 0 |
| rs6545817   | 0 |
| rs1896294   | 0 |
| rs11886868  | 0 |
| rs10195871  | 0 |
| rs10172646  | 0 |
| rs11683197  | 0 |
| rs2298948   | 0 |
| rs2100290   | 0 |
| rs13402330  | 0 |
| rs1036736   | 0 |
| rs4848780   | 0 |
| rs13006237  | 0 |
| rs7568498   | 0 |
| rs6753739   | 0 |
| rs2176040   | 0 |
| rs6731443   | 0 |
| rs2953145   | 0 |
| rs2399126   | 0 |
| rs769554    | 0 |
| rs78411303  | 0 |
| rs9826463   | 0 |
| rs6793295   | 0 |
| rs6793295   | 0 |
| rs6819266   | 0 |
| rs115136538 | 0 |
| rs10516809  | 0 |
| rs9991328   | 0 |
| rs1842896   | 0 |

|            |   |
|------------|---|
| rs4253311  | 0 |
| rs4253311  | 0 |
| rs11949289 | 0 |
| rs1823068  | 0 |
| rs2307121  | 0 |
| rs2199161  | 0 |
| rs261967   | 0 |
| rs288232   | 0 |
| rs11168048 | 0 |
| rs11168048 | 0 |
| rs10076782 | 0 |
| rs1895320  | 0 |
| rs2278255  | 0 |
| rs3799296  | 0 |
| rs4715166  | 0 |
| rs1202199  | 0 |
| rs16894878 | 0 |
| rs6917603  | 0 |
| rs1029295  | 0 |
| rs4424056  | 0 |
| rs200810   | 0 |
| rs6938574  | 0 |
| rs9373124  | 0 |
| rs9373124  | 0 |
| rs9389269  | 0 |
| rs10945919 | 0 |
| rs1524058  | 0 |
| rs3757840  | 0 |
| rs10268774 | 0 |
| rs4733271  | 0 |
| rs2722425  | 0 |
| rs7000782  | 0 |
| rs800586   | 0 |
| rs16905439 | 0 |
| rs12001137 | 0 |
| rs10811771 | 0 |
| rs7848024  | 0 |
| rs1536895  | 0 |
| rs2472476  | 0 |
| rs13290997 | 0 |
| rs2807580  | 0 |
| rs56156506 | 0 |
| rs2295912  | 0 |
| rs4387258  | 0 |
| rs1873386  | 0 |
| rs3784609  | 0 |
| rs4669418  | 0 |
| rs6733011  | 0 |
| rs10930597 | 0 |
| rs10930597 | 0 |
| rs6785504  | 0 |
| rs6774494  | 0 |
| rs9714717  | 0 |
| rs301901   | 0 |
| rs11954519 | 0 |

|             |   |
|-------------|---|
| rs634308    | 0 |
| rs7739264   | 0 |
| rs10885531  | 0 |
| rs610932    | 0 |
| rs4408325   | 0 |
| rs2290720   | 0 |
| rs8000245   | 0 |
| rs2803904   | 0 |
| rs12902421  | 0 |
| rs12940887  | 0 |
| rs4824093   | 0 |
| rs7569716   | 0 |
| rs6756629   | 0 |
| rs6756629   | 0 |
| rs1527243   | 0 |
| rs4664774   | 0 |
| rs6732189   | 0 |
| rs10510217  | 0 |
| rs1809529   | 0 |
| rs13063872  | 0 |
| rs1554120   | 0 |
| rs6764050   | 0 |
| rs11726563  | 0 |
| rs1399212   | 0 |
| rs2456203   | 0 |
| rs182503338 | 0 |
| rs182503338 | 0 |
| rs1727638   | 0 |
| rs61613191  | 0 |
| rs6974491   | 0 |
| rs6974491   | 0 |
| rs10448044  | 0 |
| rs7867456   | 0 |
| rs586716    | 0 |
| rs10968576  | 0 |
| rs10968576  | 0 |
| rs12345625  | 0 |
| rs7929679   | 4 |
| rs4666360   | 4 |
| rs7094310   | 4 |
| rs11254363  | 4 |
| rs1329650   | 4 |
| rs11190179  | 4 |
| rs2241941   | 4 |
| rs3781663   | 4 |
| rs12824981  | 4 |
| rs11621145  | 4 |
| rs11858577  | 4 |
| rs9941219   | 4 |
| rs312457    | 4 |
| rs621636    | 4 |
| rs4368253   | 4 |
| rs72974768  | 4 |
| rs1077667   | 4 |
| rs2569507   | 4 |

|             |   |
|-------------|---|
| rs737337    | 4 |
| rs17131547  | 4 |
| rs2274432   | 4 |
| rs4815868   | 4 |
| rs12480534  | 4 |
| rs140522    | 4 |
| rs140522    | 4 |
| rs77569859  | 4 |
| rs2540051   | 4 |
| rs10937275  | 4 |
| rs34311866  | 4 |
| rs4689388   | 4 |
| rs7720838   | 4 |
| rs2073643   | 4 |
| rs10037670  | 4 |
| rs9393903   | 4 |
| rs6899976   | 4 |
| rs6967385   | 4 |
| rs1534696   | 4 |
| rs4948102   | 4 |
| rs115744676 | 4 |
| rs73229090  | 4 |
| rs13266634  | 4 |
| rs13266634  | 4 |
| rs13266634  | 4 |
| rs7919006   | 4 |
| rs17152411  | 4 |
| rs742071    | 4 |
| rs642961    | 4 |
| rs7352944   | 4 |
| rs6436839   | 4 |
| rs11677466  | 4 |
| rs17863787  | 4 |
| rs4663476   | 4 |
| rs2842895   | 4 |
| rs11043007  | 4 |
| rs11577628  | 4 |
| rs711830    | 4 |
| rs17030434  | 4 |
| rs1245541   | 4 |
| rs12099085  | 4 |
| rs678069    | 4 |
| rs1532624   | 4 |
| rs1532624   | 4 |
| rs1532624   | 4 |
| rs11209003  | 4 |
| rs12753569  | 4 |
| rs6693017   | 4 |
| rs913678    | 4 |
| rs2592394   | 4 |
| rs2072590   | 4 |
| rs2072590   | 4 |
| rs1540771   | 4 |
| rs806276    | 4 |
| rs2380220   | 4 |

|            |   |
|------------|---|
| rs4735738  | 4 |
| rs3123078  | 4 |
| rs7090445  | 4 |
| rs10458771 | 4 |
| rs2237886  | 4 |
| rs478607   | 4 |
| rs3217901  | 4 |
| rs10841496 | 4 |
| rs2188380  | 4 |
| rs10132579 | 4 |
| rs1258767  | 4 |
| rs7179432  | 4 |
| rs6598541  | 4 |
| rs8049607  | 4 |
| rs7404928  | 4 |
| rs11868441 | 4 |
| rs820218   | 4 |
| rs7250872  | 4 |
| rs3093030  | 4 |
| rs2292342  | 4 |
| rs2287921  | 4 |
| rs2287921  | 4 |
| rs2287921  | 4 |
| rs2287921  | 4 |
| rs1976403  | 4 |
| rs3827730  | 4 |
| rs11209003 | 4 |
| rs11590090 | 4 |
| rs7606173  | 4 |
| rs4849121  | 4 |
| rs3733418  | 4 |
| rs9328448  | 4 |
| rs4959053  | 4 |
| rs1371737  | 4 |
| rs17151904 | 4 |
| rs11769293 | 4 |
| rs7779014  | 4 |
| rs10776934 | 4 |
| rs4458264  | 4 |
| rs4458264  | 4 |
| rs12479254 | 4 |
| rs1893767  | 4 |
| rs17797882 | 4 |
| rs743777   | 4 |
| rs743777   | 4 |
| rs1550623  | 4 |
| rs4850410  | 4 |
| rs11958779 | 5 |
| rs73912949 | 5 |
| rs11006263 | 5 |
| rs2007044  | 5 |
| rs317689   | 5 |
| rs11247009 | 5 |
| rs2880058  | 5 |
| rs2424635  | 5 |



|            |   |
|------------|---|
| rs3891585  | 5 |
| rs9841144  | 5 |
| rs10906142 | 5 |
| rs1801239  | 5 |
| rs266095   | 5 |
| rs2291429  | 5 |
| rs10857636 | 5 |
| rs2263638  | 5 |
| rs1111875  | 5 |
| rs7903146  | 5 |
| rs7903146  | 5 |
| rs7903146  | 5 |
| rs7903146  | 5 |
| rs7903146  | 5 |
| rs7903146  | 5 |
| rs7903146  | 5 |
| rs7903146  | 5 |
| rs7903146  | 5 |
| rs2981579  | 5 |
| rs1078806  | 5 |
| rs10857712 | 5 |
| rs2237895  | 5 |
| rs3858526  | 5 |
| rs7940423  | 5 |
| rs1007392  | 5 |
| rs508970   | 5 |
| rs2851682  | 5 |
| rs606452   | 5 |
| rs12576775 | 5 |
| rs12576775 | 5 |
| rs4938534  | 5 |
| rs10892761 | 5 |
| rs75059851 | 5 |
| rs2272046  | 5 |
| rs995030   | 5 |
| rs77956314 | 5 |
| rs11061269 | 5 |
| rs954108   | 5 |
| rs1886512  | 5 |
| rs2526932  | 5 |
| rs7158300  | 5 |
| rs4905226  | 5 |
| rs7173964  | 5 |
| rs12719740 | 5 |
| rs2573625  | 5 |
| rs2573652  | 5 |
| rs6498068  | 5 |
| rs17831015 | 5 |
| rs305061   | 5 |
| rs1859962  | 5 |
| rs7219585  | 5 |
| rs898534   | 5 |
| rs1316453  | 5 |
| rs8089099  | 5 |
| rs3745571  | 5 |
| rs78015699 | 5 |

|             |   |
|-------------|---|
| rs7248888   | 5 |
| rs2289731   | 5 |
| rs12711517  | 5 |
| rs2305016   | 5 |
| rs7535752   | 5 |
| rs7535752   | 5 |
| rs12568771  | 5 |
| rs16835742  | 5 |
| rs638065    | 5 |
| rs12035879  | 5 |
| rs3736757   | 5 |
| rs11584383  | 5 |
| rs11584383  | 5 |
| rs7523273   | 5 |
| rs1690789   | 5 |
| rs6108011   | 5 |
| rs932541    | 5 |
| rs6044003   | 5 |
| rs6127471   | 5 |
| rs2023454   | 5 |
| rs127430    | 5 |
| rs2427308   | 5 |
| rs2839627   | 5 |
| rs229527    | 5 |
| rs229527    | 5 |
| rs17000918  | 5 |
| rs5771069   | 5 |
| rs6413458   | 5 |
| rs17511102  | 5 |
| rs6741892   | 5 |
| rs7579899   | 5 |
| rs115522963 | 5 |
| rs3771381   | 5 |
| rs4252023   | 5 |
| rs4321325   | 5 |
| rs72899866  | 5 |
| rs2551802   | 5 |
| rs2058710   | 5 |
| rs11680012  | 5 |
| rs3739070   | 5 |
| rs3749171   | 5 |
| rs7620363   | 5 |
| rs7650267   | 5 |
| rs2742417   | 5 |
| rs35593266  | 5 |
| rs1847202   | 5 |
| rs9810857   | 5 |
| rs6788895   | 5 |
| rs9841616   | 5 |
| rs4234853   | 5 |
| rs10489087  | 5 |
| rs4615179   | 5 |
| rs1902859   | 5 |
| rs1902859   | 5 |
| rs1902859   | 5 |

|            |   |
|------------|---|
| rs3853444  | 5 |
| rs13144478 | 5 |
| rs2090104  | 5 |
| rs17031671 | 5 |
| rs1963569  | 5 |
| rs402710   | 5 |
| rs17716202 | 5 |
| rs6893807  | 5 |
| rs31198    | 5 |
| rs9393366  | 5 |
| rs16889440 | 5 |
| rs7759742  | 5 |
| rs972275   | 5 |
| rs7772697  | 5 |
| rs184074   | 5 |
| rs926849   | 5 |
| rs9364813  | 5 |
| rs6968865  | 5 |
| rs73302615 | 5 |
| rs38313    | 5 |
| rs314370   | 5 |
| rs2687481  | 5 |
| rs791595   | 5 |
| rs2854536  | 5 |
| rs11771145 | 5 |
| rs1005390  | 5 |
| rs1005390  | 5 |
| rs2360806  | 5 |
| rs10089517 | 5 |
| rs10089517 | 5 |
| rs40457    | 5 |
| rs6993449  | 5 |
| rs1036821  | 5 |
| rs7465272  | 5 |
| rs35419961 | 5 |
| rs4745062  | 5 |
| rs2006996  | 5 |
| rs10988428 | 5 |
| rs495828   | 5 |
| rs495828   | 5 |
| rs495828   | 5 |
| rs495828   | 5 |
| rs495828   | 5 |
| rs4491175  | 5 |
| rs478881   | 5 |
| rs7979473  | 5 |
| rs10773046 | 5 |
| rs223116   | 5 |
| rs129963   | 5 |
| rs9924951  | 5 |
| rs712046   | 5 |
| rs8102754  | 5 |
| rs11465802 | 5 |
| rs9988642  | 5 |
| rs6669582  | 5 |

|            |   |
|------------|---|
| rs10789230 | 5 |
| rs905938   | 5 |
| rs905938   | 5 |
| rs12039519 | 5 |
| rs11086243 | 5 |
| rs4925325  | 5 |
| rs2075876  | 5 |
| rs8127571  | 5 |
| rs10166311 | 5 |
| rs745962   | 5 |
| rs1656404  | 5 |
| rs1881492  | 5 |
| rs10210302 | 5 |
| rs12994997 | 5 |
| rs10173355 | 5 |
| rs3755319  | 5 |
| rs1991705  | 5 |
| rs13401104 | 5 |
| rs7607316  | 5 |
| rs7599706  | 5 |
| rs7642243  | 5 |
| rs12198220 | 5 |
| rs9314614  | 5 |
| rs2980879  | 5 |
| rs1782032  | 5 |
| rs4132699  | 5 |
| rs7916441  | 5 |
| rs7916441  | 5 |
| rs12772169 | 5 |
| rs10838532 | 5 |
| rs3889237  | 5 |
| rs11675119 | 5 |
| rs11713158 | 5 |
| rs17584516 | 5 |
| rs4629318  | 5 |
| rs11713158 | 5 |
| rs1173766  | 5 |
| rs2392510  | 5 |
| rs9406636  | 5 |
| rs8176741  | 5 |
| rs2393967  | 5 |
| rs11024598 | 5 |
| rs11263654 | 5 |
| rs4938642  | 5 |
| rs1464500  | 5 |
| rs2731006  | 5 |
| rs12868495 | 5 |
| rs8008758  | 5 |
| rs11864146 | 5 |
| rs12447690 | 5 |
| rs11880333 | 5 |
| rs2230245  | 5 |
| rs1172822  | 5 |
| rs1172822  | 5 |
| rs4648845  | 5 |

|            |   |
|------------|---|
| rs3920498  | 5 |
| rs16835742 | 5 |
| rs11465802 | 5 |
| rs9988642  | 5 |
| rs6669582  | 5 |
| rs10789230 | 5 |
| rs10918270 | 5 |
| rs11809180 | 5 |
| rs12134279 | 5 |
| rs1739654  | 5 |
| rs6124878  | 5 |
| rs11703808 | 5 |
| rs761746   | 5 |
| rs9621305  | 5 |
| rs1058065  | 5 |
| rs10194115 | 5 |
| rs4972806  | 5 |
| rs3849570  | 5 |
| rs13136331 | 5 |
| rs898518   | 5 |
| rs11741861 | 5 |
| rs5985     | 5 |
| rs2457335  | 5 |
| rs6922893  | 5 |
| rs9918668  | 5 |
| rs4731742  | 5 |
| rs10488172 | 5 |
| rs7814749  | 5 |
| rs6992848  | 5 |
| rs2999399  | 5 |
| rs71508903 | 5 |
| rs685782   | 5 |
| rs7112383  | 5 |
| rs508487   | 5 |
| rs4937362  | 5 |
| rs4937362  | 5 |
| rs12422552 | 5 |
| rs1520832  | 5 |
| rs80130819 | 5 |
| rs10875943 | 5 |
| rs17178006 | 5 |
| rs17178006 | 5 |
| rs9318086  | 5 |
| rs9525638  | 5 |
| rs9525638  | 5 |
| rs2770228  | 5 |
| rs4907479  | 5 |
| rs4280164  | 5 |
| rs8019546  | 5 |
| rs7157785  | 5 |
| rs7157785  | 5 |
| rs7157785  | 5 |
| rs7157785  | 5 |
| rs1077989  | 5 |
| rs1077989  | 5 |

|             |   |
|-------------|---|
| rs737387    | 5 |
| rs2842347   | 5 |
| rs722599    | 5 |
| rs10150332  | 5 |
| rs1129038   | 5 |
| rs936229    | 5 |
| rs7181753   | 5 |
| rs2018860   | 5 |
| rs12446940  | 5 |
| rs2221433   | 5 |
| rs7197653   | 5 |
| rs270421    | 5 |
| rs30388     | 5 |
| rs12446319  | 5 |
| rs3844412   | 5 |
| rs11648716  | 5 |
| rs242557    | 5 |
| rs11651708  | 5 |
| rs71380849  | 5 |
| rs357894    | 5 |
| rs3745567   | 5 |
| rs1051738   | 5 |
| rs8099939   | 5 |
| rs10119     | 5 |
| rs429358    | 5 |
| rs429358    | 5 |
| rs429358    | 5 |
| rs429358    | 5 |
| rs61776290  | 5 |
| rs3790645   | 5 |
| rs11465802  | 5 |
| rs9988642   | 5 |
| rs6669582   | 5 |
| rs10789230  | 5 |
| rs115699453 | 5 |
| rs6060278   | 5 |
| rs2238732   | 5 |
| rs9608102   | 5 |
| rs137699    | 5 |
| rs4038131   | 5 |
| rs404005    | 5 |
| rs10189857  | 5 |
| rs1427407   | 5 |
| rs7599488   | 5 |
| rs766432    | 5 |
| rs4671393   | 5 |
| rs7584113   | 5 |
| rs7557939   | 5 |
| rs6706648   | 5 |
| rs6738440   | 5 |
| rs6729815   | 5 |
| rs1896295   | 5 |
| rs1896296   | 5 |
| rs17636747  | 5 |
| rs13419716  | 5 |

|            |   |
|------------|---|
| rs2114646  | 5 |
| rs231770   | 5 |
| rs972540   | 5 |
| rs12151790 | 5 |
| rs11679072 | 5 |
| rs4675874  | 5 |
| rs1372072  | 5 |
| rs10865924 | 5 |
| rs6784615  | 5 |
| rs13072512 | 5 |
| rs2135319  | 5 |
| rs1801725  | 5 |
| rs7694661  | 5 |
| rs62277617 | 5 |
| rs3114018  | 5 |
| rs3114018  | 5 |
| rs12500579 | 5 |
| rs17049741 | 5 |
| rs2726807  | 5 |
| rs1912826  | 5 |
| rs7725218  | 5 |
| rs11743355 | 5 |
| rs2052550  | 5 |
| rs7700895  | 5 |
| rs17763373 | 5 |
| rs4713103  | 5 |
| rs9383153  | 5 |
| rs7756992  | 5 |
| rs1799945  | 5 |
| rs1799945  | 5 |
| rs1799945  | 5 |
| rs1799945  | 5 |
| rs4418214  | 5 |
| rs4418214  | 5 |
| rs3094604  | 5 |
| rs28421666 | 5 |
| rs17299841 | 5 |
| rs10259085 | 5 |
| rs1014137  | 5 |
| rs10237067 | 5 |
| rs500454   | 5 |
| rs6466479  | 5 |
| rs7784447  | 5 |
| rs7782376  | 5 |
| rs12541335 | 5 |
| rs28834970 | 5 |
| rs11991744 | 5 |
| rs4360309  | 5 |
| rs61271866 | 5 |
| rs3747547  | 5 |
| rs7855088  | 5 |
| rs10121150 | 5 |
| rs7021663  | 5 |
| rs34971035 | 5 |
| rs34971035 | 5 |

|            |   |
|------------|---|
| rs17582416 | 5 |
| rs11018023 | 5 |
| rs1014922  | 5 |
| rs5757949  | 5 |
| rs1550546  | 5 |
| rs9301951  | 5 |
| rs17832777 | 5 |
| rs6540223  | 5 |
| rs2059397  | 5 |
| rs4239702  | 5 |
| rs597800   | 5 |
| rs4618210  | 5 |
| rs10510837 | 5 |
| rs2670321  | 5 |
| rs13068298 | 5 |
| rs6869841  | 5 |
| rs7448069  | 5 |
| rs2621416  | 5 |
| rs6901250  | 5 |
| rs42648    | 5 |
| rs10822136 | 6 |
| rs10750173 | 6 |
| rs10790382 | 6 |
| rs78153629 | 6 |
| rs6977820  | 6 |
| rs644234   | 6 |
| rs9615264  | 6 |
| rs202072   | 6 |
| rs7775861  | 6 |
| rs7791362  | 6 |
| rs11049611 | 6 |
| rs7297610  | 6 |
| rs11104877 | 6 |
| rs11071200 | 6 |
| rs8023580  | 6 |
| rs9956738  | 6 |
| rs17011455 | 6 |
| rs13028485 | 6 |
| rs1429411  | 6 |
| rs62287976 | 6 |
| rs1501357  | 6 |
| rs1247318  | 6 |
| rs17513961 | 6 |
| rs13226763 | 6 |
| rs11777116 | 6 |
| rs10817758 | 6 |
| rs11594111 | 6 |
| rs7076247  | 6 |
| rs7922491  | 6 |
| rs56322409 | 6 |
| rs927821   | 6 |
| rs61862032 | 6 |
| rs12788102 | 6 |
| rs11041530 | 6 |
| rs607987   | 6 |



|            |   |
|------------|---|
| rs9300039  | 6 |
| rs174555   | 6 |
| rs174555   | 6 |
| rs174555   | 6 |
| rs10792830 | 6 |
| rs10831284 | 6 |
| rs1793257  | 6 |
| rs1457614  | 6 |
| rs4363657  | 6 |
| rs4363657  | 6 |
| rs1606355  | 6 |
| rs7980799  | 6 |
| rs11172134 | 6 |
| rs2303970  | 6 |
| rs4964469  | 6 |
| rs1896312  | 6 |
| rs7978454  | 6 |
| rs2798269  | 6 |
| rs11571833 | 6 |
| rs11571833 | 6 |
| rs573666   | 6 |
| rs1340319  | 6 |
| rs9599848  | 6 |
| rs11838918 | 6 |
| rs11838918 | 6 |
| rs7328464  | 6 |
| rs1529276  | 6 |
| rs1956388  | 6 |
| rs8004664  | 6 |
| rs1258763  | 6 |
| rs16964211 | 6 |
| rs1528473  | 6 |
| rs937254   | 6 |
| rs1077835  | 6 |
| rs3743266  | 6 |
| rs12591650 | 6 |
| rs12050794 | 6 |
| rs2764743  | 6 |
| rs274068   | 6 |
| rs12599426 | 6 |
| rs2080454  | 6 |
| rs7195303  | 6 |
| rs2074409  | 6 |
| rs7216389  | 6 |
| rs11079757 | 6 |
| rs7237848  | 6 |
| rs10775480 | 6 |
| rs1970671  | 6 |
| rs10469266 | 6 |
| rs73963343 | 6 |
| rs10514168 | 6 |
| rs632111   | 6 |
| rs3826656  | 6 |
| rs9628987  | 6 |
| rs9628987  | 6 |

|             |   |
|-------------|---|
| rs74225573  | 6 |
| rs4654925   | 6 |
| rs72647484  | 6 |
| rs528059    | 6 |
| rs544991    | 6 |
| rs6686842   | 6 |
| rs657452    | 6 |
| rs117633859 | 6 |
| rs4650608   | 6 |
| rs4650608   | 6 |
| rs4650608   | 6 |
| rs11162963  | 6 |
| rs1770678   | 6 |
| rs1146509   | 6 |
| rs857684    | 6 |
| rs12406092  | 6 |
| rs2488389   | 6 |
| rs12130212  | 6 |
| rs12757165  | 6 |
| rs6687758   | 6 |
| rs6687758   | 6 |
| rs7529251   | 6 |
| rs6045676   | 6 |
| rs4815879   | 6 |
| rs6085820   | 6 |
| rs6040399   | 6 |
| rs680379    | 6 |
| rs680379    | 6 |
| rs680379    | 6 |
| rs2208059   | 6 |
| rs6044001   | 6 |
| rs6047116   | 6 |
| rs1160312   | 6 |
| rs2281558   | 6 |
| rs2832270   | 6 |
| rs4911642   | 6 |
| rs2330809   | 6 |
| rs1001021   | 6 |
| rs9607782   | 6 |
| rs6741148   | 6 |
| rs12373805  | 6 |
| rs4852324   | 6 |
| rs1470506   | 6 |
| rs13021885  | 6 |
| rs34311235  | 6 |
| rs3820706   | 6 |
| rs16836124  | 6 |
| rs12693043  | 6 |
| rs13424612  | 6 |
| rs1669338   | 6 |
| rs1124480   | 6 |
| rs76942353  | 6 |
| rs1490157   | 6 |
| rs13072940  | 6 |
| rs538867    | 6 |

|             |   |
|-------------|---|
| rs13064588  | 6 |
| rs10514718  | 6 |
| rs1521418   | 6 |
| rs1830084   | 6 |
| rs6794092   | 6 |
| rs78647349  | 6 |
| rs11725593  | 6 |
| rs1906528   | 6 |
| rs6832769   | 6 |
| rs7685921   | 6 |
| rs340630    | 6 |
| rs2725236   | 6 |
| rs6855885   | 6 |
| rs2452591   | 6 |
| rs2087160   | 6 |
| rs7655841   | 6 |
| rs114646238 | 6 |
| rs11099040  | 6 |
| rs1492820   | 6 |
| rs1378552   | 6 |
| rs11748327  | 6 |
| rs4701523   | 6 |
| rs6888304   | 6 |
| rs71627250  | 6 |
| rs921943    | 6 |
| rs921943    | 6 |
| rs1829883   | 6 |
| rs11241936  | 6 |
| rs12661281  | 6 |
| rs204999    | 6 |
| rs9268542   | 6 |
| rs6903608   | 6 |
| rs10484561  | 6 |
| rs7767572   | 6 |
| rs9447700   | 6 |
| rs12198063  | 6 |
| rs10155981  | 6 |
| rs10238623  | 6 |
| rs12532960  | 6 |
| rs62459614  | 6 |
| rs7786765   | 6 |
| rs12533251  | 6 |
| rs4646450   | 6 |
| rs17477177  | 6 |
| rs5009270   | 6 |
| rs2538958   | 6 |
| rs114252942 | 6 |
| rs6601327   | 6 |
| rs6989010   | 6 |
| rs1594829   | 6 |
| rs10958369  | 6 |
| rs7815788   | 6 |
| rs12541902  | 6 |
| rs2403083   | 6 |
| rs921231    | 6 |

|             |   |
|-------------|---|
| rs7014900   | 6 |
| rs11988997  | 6 |
| rs16906293  | 6 |
| rs10973956  | 6 |
| rs11143230  | 6 |
| rs1888221   | 6 |
| rs7036846   | 6 |
| rs10429475  | 6 |
| rs11796357  | 6 |
| rs11796357  | 6 |
| rs5907577   | 6 |
| rs10508503  | 6 |
| rs11245052  | 6 |
| rs2509843   | 6 |
| rs17124610  | 6 |
| rs6563569   | 6 |
| rs4886238   | 6 |
| rs2282032   | 6 |
| rs2854437   | 6 |
| rs11634397  | 6 |
| rs7477      | 6 |
| rs116908816 | 6 |
| rs12140275  | 6 |
| rs6663731   | 6 |
| rs11209002  | 6 |
| rs2902440   | 6 |
| rs11465804  | 6 |
| rs10889676  | 6 |
| rs6689305   | 6 |
| rs7523050   | 6 |
| rs7550169   | 6 |
| rs17791782  | 6 |
| rs13046373  | 6 |
| rs12986445  | 6 |
| rs12986445  | 6 |
| rs1465618   | 6 |
| rs6733160   | 6 |
| rs6712333   | 6 |
| rs6750795   | 6 |
| rs6728302   | 6 |
| rs1656402   | 6 |
| rs2741012   | 6 |
| rs1875263   | 6 |
| rs929596    | 6 |
| rs10166942  | 6 |
| rs13025591  | 6 |
| rs11687170  | 6 |
| rs358806    | 6 |
| rs6448771   | 6 |
| rs546829    | 6 |
| rs11951515  | 6 |
| rs647161    | 6 |
| rs12663356  | 6 |
| rs9267911   | 6 |
| rs12196860  | 6 |

|            |   |
|------------|---|
| rs10455590 | 6 |
| rs7806994  | 6 |
| rs2840445  | 6 |
| rs12716641 | 6 |
| rs73201717 | 6 |
| rs10098647 | 6 |
| rs10812610 | 6 |
| rs10969853 | 6 |
| rs8015016  | 6 |
| rs17301853 | 6 |
| rs17301853 | 6 |
| rs13428823 | 6 |
| rs7597593  | 6 |
| rs1864982  | 6 |
| rs788076   | 6 |
| rs10763170 | 6 |
| rs2017305  | 6 |
| rs7923837  | 6 |
| rs7108470  | 6 |
| rs4474514  | 6 |
| rs1464108  | 6 |
| rs3736995  | 6 |
| rs17111394 | 6 |
| rs151222   | 6 |
| rs7206971  | 6 |
| rs7206971  | 6 |
| rs1380836  | 6 |
| rs1787200  | 6 |
| rs7244261  | 6 |
| rs6686929  | 6 |
| rs3091242  | 6 |
| rs528059   | 6 |
| rs544991   | 6 |
| rs11206801 | 6 |
| rs10889569 | 6 |
| rs11209002 | 6 |
| rs2902440  | 6 |
| rs11465804 | 6 |
| rs10889676 | 6 |
| rs4656784  | 6 |
| rs11265260 | 6 |
| rs6077251  | 6 |
| rs151361   | 6 |
| rs1006899  | 6 |
| rs9609565  | 6 |
| rs13021737 | 6 |
| rs11677203 | 6 |
| rs13396424 | 6 |
| rs12328675 | 6 |
| rs824931   | 6 |
| rs9815195  | 6 |
| rs11129078 | 6 |
| rs3773643  | 6 |
| rs7629490  | 6 |
| rs16850864 | 6 |

|            |   |
|------------|---|
| rs7689350  | 6 |
| rs10519410 | 6 |
| rs73132886 | 6 |
| rs4869419  | 6 |
| rs4713039  | 6 |
| rs9468811  | 6 |
| rs3130284  | 6 |
| rs2390593  | 6 |
| rs6601299  | 6 |
| rs1208     | 6 |
| rs13702    | 6 |
| rs17786744 | 6 |
| rs2444896  | 6 |
| rs4256922  | 6 |
| rs4363506  | 6 |
| rs1353649  | 6 |
| rs652722   | 6 |
| rs7951105  | 6 |
| rs2176598  | 6 |
| rs4293143  | 6 |
| rs74380195 | 6 |
| rs4936518  | 6 |
| rs12832485 | 6 |
| rs7137869  | 6 |
| rs830124   | 6 |
| rs9542236  | 6 |
| rs571411   | 6 |
| rs17536328 | 6 |
| rs9567307  | 6 |
| rs7325564  | 6 |
| rs9600079  | 6 |
| rs10132280 | 6 |
| rs7494275  | 6 |
| rs765899   | 6 |
| rs999737   | 6 |
| rs7141420  | 6 |
| rs7141420  | 6 |
| rs10220309 | 6 |
| rs10131728 | 6 |
| rs2093746  | 6 |
| rs8042543  | 6 |
| rs4620914  | 6 |
| rs1533665  | 6 |
| rs2307449  | 6 |
| rs11648796 | 6 |
| rs5743289  | 6 |
| rs5743289  | 6 |
| rs4784223  | 6 |
| rs9932186  | 6 |
| rs1728785  | 6 |
| rs12942547 | 6 |
| rs1431318  | 6 |
| rs1019238  | 6 |
| rs8079702  | 6 |
| rs8079702  | 6 |

|             |   |
|-------------|---|
| rs10502575  | 6 |
| rs12967135  | 6 |
| rs11661646  | 6 |
| rs11663206  | 6 |
| rs2163813   | 6 |
| rs8102476   | 6 |
| rs2746347   | 6 |
| rs12402265  | 6 |
| rs11209002  | 6 |
| rs2902440   | 6 |
| rs11465804  | 6 |
| rs10889676  | 6 |
| rs10443196  | 6 |
| rs17450029  | 6 |
| rs11205006  | 6 |
| rs3761959   | 6 |
| rs3761959   | 6 |
| rs4233356   | 6 |
| rs9427573   | 6 |
| rs2786111   | 6 |
| rs11118993  | 6 |
| rs6044112   | 6 |
| rs6132333   | 6 |
| rs4810479   | 6 |
| rs6094710   | 6 |
| rs11089937  | 6 |
| rs6733301   | 6 |
| rs6753473   | 6 |
| rs1526687   | 6 |
| rs7565301   | 6 |
| rs6545883   | 6 |
| rs6738962   | 6 |
| rs12999542  | 6 |
| rs7567288   | 6 |
| rs11890028  | 6 |
| rs13010713  | 6 |
| rs11691711  | 6 |
| rs62184315  | 6 |
| rs1024161   | 6 |
| rs1024161   | 6 |
| rs12470505  | 6 |
| rs12472274  | 6 |
| rs6799705   | 6 |
| rs73071352  | 6 |
| rs73071352  | 6 |
| rs6782264   | 6 |
| rs1670533   | 6 |
| rs2292298   | 6 |
| rs4389526   | 6 |
| rs788867    | 6 |
| rs994014    | 6 |
| rs1463104   | 6 |
| rs2609255   | 6 |
| rs114452217 | 6 |
| rs1443170   | 6 |

|            |   |
|------------|---|
| rs4547811  | 6 |
| rs1633735  | 6 |
| rs795544   | 6 |
| rs73069924 | 6 |
| rs6452790  | 6 |
| rs2115172  | 6 |
| rs10077875 | 6 |
| rs2405522  | 6 |
| rs11740474 | 6 |
| rs58873874 | 6 |
| rs10040979 | 6 |
| rs12212674 | 6 |
| rs2894207  | 6 |
| rs3134792  | 6 |
| rs3134792  | 6 |
| rs6910071  | 6 |
| rs9268402  | 6 |
| rs6457620  | 6 |
| rs6457620  | 6 |
| rs9276606  | 6 |
| rs3747767  | 6 |
| rs2530544  | 6 |
| rs6961611  | 6 |
| rs73215715 | 6 |
| rs17153527 | 6 |
| rs4730250  | 6 |
| rs634010   | 6 |
| rs4609139  | 6 |
| rs722782   | 6 |
| rs75609241 | 6 |
| rs7815909  | 6 |
| rs3110127  | 6 |
| rs10957961 | 6 |
| rs7004633  | 6 |
| rs7004633  | 6 |
| rs17359493 | 6 |
| rs6469804  | 6 |
| rs7837688  | 6 |
| rs1478110  | 6 |
| rs7045640  | 6 |
| rs2479106  | 6 |
| rs569434   | 6 |
| rs12772243 | 6 |
| rs10901513 | 6 |
| rs11820589 | 6 |
| rs11863065 | 6 |
| rs10494270 | 6 |
| rs3914132  | 6 |
| rs13240464 | 6 |
| rs1149933  | 6 |
| rs12265836 | 6 |
| rs1200821  | 6 |
| rs703970   | 6 |
| rs77216358 | 6 |
| rs11065706 | 6 |



|             |    |
|-------------|----|
| rs4942242   | 6  |
| rs8002779   | 6  |
| rs9788721   | 6  |
| rs12596210  | 6  |
| rs4839516   | 6  |
| rs4382726   | 6  |
| rs60490158  | 6  |
| rs62174474  | 6  |
| rs13023239  | 6  |
| rs3770549   | 6  |
| rs7607369   | 6  |
| rs16864755  | 6  |
| rs1516459   | 6  |
| rs7612581   | 6  |
| rs9810233   | 6  |
| rs13074924  | 6  |
| rs7656730   | 6  |
| rs13135284  | 6  |
| rs253959    | 6  |
| rs1150561   | 6  |
| rs9357155   | 6  |
| rs7742824   | 6  |
| rs1449672   | 6  |
| rs10259199  | 6  |
| rs114945094 | 6  |
| rs6559140   | 6  |
| rs1331623   | 6  |
| rs4821544   | 1a |
| rs3218255   | 1b |
| rs2121875   | 1b |
| rs2535629   | 1b |
| rs2370759   | 1f |
| rs16928809  | 1f |
| rs1692120   | 1f |
| rs3825932   | 1f |
| rs12915845  | 1f |
| rs11649653  | 1f |
| rs3785574   | 1f |
| rs6997      | 1f |
| rs10004195  | 1f |
| rs2269426   | 1f |
| rs9268528   | 1f |
| rs2858870   | 1f |
| rs798497    | 1f |
| rs471364    | 1f |
| rs11789898  | 1f |
| rs4950928   | 1f |
| rs11167260  | 1f |
| rs1883832   | 1f |
| rs2318131   | 1f |
| rs6489785   | 1f |
| rs154657    | 1f |
| rs6088792   | 1f |
| rs12627933  | 1f |
| rs6863411   | 1f |

|            |    |
|------------|----|
| rs6457327  | 1f |
| rs3130618  | 1f |
| rs3130618  | 1f |
| rs3129882  | 1f |
| rs3129882  | 1f |
| rs7748270  | 1f |
| rs7117404  | 1f |
| rs2074518  | 1f |
| rs3894194  | 1f |
| rs3894194  | 1f |
| rs867186   | 1f |
| rs12489828 | 1f |
| rs7192     | 1f |
| rs660895   | 1f |
| rs660895   | 1f |
| rs7386474  | 1f |
| rs7025162  | 1f |
| rs3731714  | 1f |
| rs971768   | 1f |
| rs58370486 | 2a |
| rs1256531  | 2a |
| rs10849441 | 2b |
| rs1227756  | 2b |
| rs963167   | 2b |
| rs3922435  | 2b |
| rs835367   | 2b |
| rs12032643 | 2b |
| rs79384503 | 2b |
| rs10938494 | 2b |
| rs7770731  | 2b |
| rs7341237  | 2b |
| rs4410871  | 2b |
| rs4410871  | 2b |
| rs2302729  | 2b |
| rs11150589 | 2b |
| rs2476601  | 2b |
| rs2476601  | 2b |
| rs2476601  | 2b |
| rs2476601  | 2b |
| rs2476601  | 2b |
| rs2476601  | 2b |
| rs2476601  | 2b |
| rs2476601  | 2b |
| rs2073398  | 2b |
| rs7571816  | 2b |
| rs422421   | 2b |
| rs3824999  | 2b |
| rs4846922  | 2b |
| rs319598   | 2b |
| rs3805663  | 2b |
| rs4711279  | 2b |
| rs10456100 | 2b |
| rs2796441  | 2b |
| rs290475   | 2b |
| rs600231   | 2b |
| rs1144713  | 2b |

|             |    |
|-------------|----|
| rs17356907  | 2b |
| rs17356907  | 2b |
| rs9525916   | 2b |
| rs9525916   | 2b |
| rs704       | 2b |
| rs2287838   | 2b |
| rs8109578   | 2b |
| rs1342038   | 2b |
| rs17310467  | 2b |
| rs11684202  | 2b |
| rs2302612   | 2b |
| rs2667011   | 2b |
| rs169082    | 2b |
| rs67250450  | 2b |
| rs10781380  | 2b |
| rs11539570  | 2b |
| rs11264330  | 2b |
| rs643381    | 2b |
| rs55874825  | 2c |
| rs74346392  | 2c |
| rs9295474   | 2c |
| rs409974    | 3a |
| rs11605083  | 3a |
| rs116909374 | 3a |
| rs7229639   | 3a |
| rs307896    | 3a |
| rs10797919  | 3a |
| rs669408    | 3a |
| rs11919041  | 3a |
| rs789852    | 3a |
| rs9461776   | 3a |
| rs16872971  | 3a |
| rs16872971  | 3a |
| rs1889321   | 3a |
| rs946053    | 3a |
| rs1800775   | 3a |
| rs1800775   | 3a |
| rs1800775   | 3a |
| rs1800775   | 3a |
| rs1800775   | 3a |
| rs9896933   | 3a |
| rs13394720  | 3a |
| rs11892031  | 3a |
| rs7164883   | 3a |
| rs4670766   | 3a |
| rs13358864  | 3a |
| rs757369    | 3a |
| rs1873147   | 3a |
| rs11205303  | 3a |
| rs11205303  | 3a |
| rs13045180  | 3a |
| rs496300    | 3a |
| rs1982346   | 3a |
| rs17026425  | 3a |
| rs149709    | 3a |

|            |    |
|------------|----|
| rs1342371  | 3a |
| rs10808265 | 3a |
| rs483610   | 3a |
| rs75825892 | 3a |
