# Supplementary material for: A reference catalog of DNA palindromes in the human genome and their variations in 1000 Genomes
Source: Springer Nature journal article supplement (doi:10.1038/s41439-020-00127-5), 2020-11-20
Supplement: MOESM10 [file 41439_2020_127_MOESM10_ESM.xlsx]

## Sheet: Sheet1
PALINDROME						GWAS				eQTL						REGULOME	GEO
Chr	Ref_mid	Ref_len	Ref	Alt	Palindrome change	Disease/trait	Gene	SNPs	Context	Variant ID	P-value	P-value threshold	Normalized effect size	T-statistic	Tissue	Protein binding (for high Regulome score)	Disease-specific gene expression
2	233998475	0	C	A	New	Coronary heart disease	INPP5D	rs10933436	intron_variant	2_233998481_C_A_b37	0.00027	3.7e-05	0.091	3.7	Whole Blood	n/a	n/a
3	150467810	14	G	T	Near_to_perfect	Breast cancer	SIAH2	rs6788895	intron_variant	3_150467808_G_T_b37	0.0013	4e-05	0.2	3.3	Whole Blood	n/a	n/a
6	32680921	22	T	G	Non_identical	Rheumatoid arthritis	HLA-DQB1	rs7765379	intron_variant	6_32680928_T_G_b37	4.8e-05	5.6e-05	-0.33	-4.1	Whole Blood	n/a	n/a
6	32577380	18	A	G	Perfect_to_near	Rheumatoid arthritis	HLA-DQA1	rs660895	intron_variant	6_32577380_A_G_b37	1.3e-06	6.4e-05	-0.18	-4.9	Whole Blood	BCLAF1, POLR2A	Monocytes from peripheral blood of rheumatoid arthritis patients _vs_ healthy donors_GPL96, -1.77 (0.0224)
6	32663999	18	G	C	Perfect_to_near	Rheumatoid arthritis	HLA-DQB1	rs6457620	intron_variant	6_32663999_G_C_b37	5.7e-08	5.6e-05	-0.26	-5.6	Whole Blood		n/a
6	32577380	18	A	G	Perfect_to_near	Rheumatoid arthritis	HLA-DRB1	rs660895	intron_variant	6_32577380_A_G_b37	5.3e-14	7e-05	-0.21	-7.9	Whole Blood	BCLAF1, POLR2A	n/a
7	110898918	10	T	C	Smaller	Schizophrenia	IMMP2L	rs13240464	intron_variant	7_110898915_T_C_b37	6.7e-06	5.6e-05	0.22	4.6	Whole Blood	n/a	n/a
8	27195120	14	T	C	Perfect_to_near	Alzheimer's disease (late onset)	PTK2B	rs28834970	intron_variant	8_27195121_T_C_b37	1.6e-08	3.8e-05	0.13	5.8	Whole Blood	n/a	n/a
11	133822566	8	A	G	Near_to_perfect	Schizophrenia	IGSF9B	rs75059851	intron_variant	11_133822569_A_G_b37	6.3e-06	1.9e-05	0.24	4.6	Whole Blood	n/a	n/a
11	59939301	24	T	G	Smaller	Alzheimer's disease	MS4A6A	rs610932	downstream_gene_variant	11_59939307_T_G_b37	5.2e-09	6.2e-05	0.11	6	Whole Blood	n/a	PBMCs from patients with Alzheimers disease _vs_ mild cognitive impairment 1.28 (0.0427)
12	29917261	26	C	A	Absent	Schizophrenia	TMTC1	rs679087	intron_variant	12_29917265_C_A_b37	6.3e-18	4.5e-05	-0.56	-9.2	Whole Blood	n/a	n/a
15	79235445	14	T	C	Near_to_perfect	Type 1 diabetes	CTSH	rs3825932	intron_variant	15_79235446_T_C_b37	2e-13	3.5e-05	0.28	7.7	Whole Blood	YY1, NFKB1	PBMCs from BABYDIET cohort children with type 1 diabetes mellitus predisposition _vs_ normal adults, -1.75 (2.6E-41); PBMCs from long standing type 1 diabetes mellitus patients _vs_ normal adults, -1.35 (4.20E-12); PBMCs from newly diagnosed type 1 diabetes mellitus patients _vs_ normal adults, -1.4 (5.4E-12); PBMCs from type 1 diabetes mellitus patients _vs_ normal adults, -1.49 (2E-23)
15	45357404	0	T	G	New	Alzheimer's disease in APOE e4+ carriers	SORD	rs2854437	intron_variant	15_45357410_T_G_b37	0.00026	1.8e-05	0.45	3.8	Brain - Hippocampus	n/a	Cortical lesions of Alzheimers disease patients _vs_ cortex of healthy controls, 1.35 (0.0153); CA1 hippocampal gray matter from patients with severe Alzheimer's Disease _vs_ healthy control, 1.36 (2.22E-02); CA1 hippocampal gray matter from patients with moderate Alzheimer's Disease _vs_ healthy control, -1.26 (0.0486)
16	20674486	20	G	C	Non_identical	Schizophrenia	ACSM1	rs151222	intron_variant	16_20674492_G_C_b37	8.4e-06	4.2e-05	0.48	4.5	Whole Blood	n/a	n/a
16	52575907	10	A	G	Perfect_to_near	Breast cancer (early onset)	TOX3	rs4784223	intron_variant	16_52575907_A_G_b37	0.00062	1.6e-05	-0.18	-3.5	Breast - Mammary Tissue	n/a	Breast cancers, basal like (BLC) _vs_ normal breast, -3.08 (0.0012); Breast cancers, non-basal like (non-BLC) _vs_ normal breast, 2.04 (0.0305); Breast cancer-Basal-like (BLC) tumors _vs_ normal tissue, -3.2 (0.0014); Breast cancer-non-Basal (non-BLC) tumors _vs_ normal tissue, 1.99 (0.0347); Human breast carcinoma tumoral sample _vs_ normal breast, 3.45 (0.0075); Invasive ductal carcinoma tumors…
20	44749239	26	T	C	Smaller	Rheumatoid arthritis	CD40	rs4239702	intron_variant	20_44749251_T_C_b37	1e-10	3.6e-05	0.25	6.7	Whole Blood	n/a	B cells from rheumatoid arthritis patient _vs_ healthy individual, 1.35 (0.0044)
