# Supplementary figures and images for: A reference catalog of DNA palindromes in the human genome and their variations in 1000 Genomes
Source: Springer Nature journal article supplement (doi:10.1038/s41439-020-00127-5), 2020-11-20

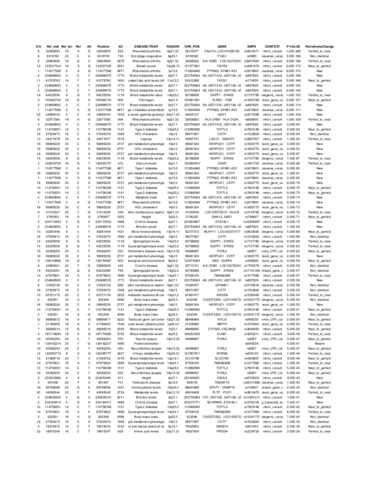

Supplement: MOESM5 [file 41439_2020_127_MOESM5_ESM.pdf]
